# Supplementary material
Source: PubMed Central journal article supplement (PMC6629090)
Supplement: jciinsight-4-128577-s035.pdf [file jciinsight-4-128577-s035.pdf]

## **Biomarkers of Cavernous Angioma with Symptomatic Hemorrhage**

**Authors:** Seán Lyne<sup>1†</sup>; Romuald Girard<sup>1†</sup>; Janne Koskimäki<sup>1</sup>; Hussein A. Zeineddine<sup>1</sup>; Dongdong Zhang<sup>1</sup>; Ying Cao<sup>1</sup>; Yan Li<sup>2</sup>; Agnieszka Stadnik<sup>1</sup>; Thomas Moore<sup>1</sup>; Rhonda Lightle<sup>1</sup>; Changbin Shi<sup>1</sup>; Robert Shenkar<sup>1</sup>; Julián Carrión-Penagos<sup>1</sup>; Sean P. Polster<sup>1</sup>; Sharbel Romanos<sup>1</sup>; Amy Akers<sup>3</sup>; Miguel Lopez-Ramirez<sup>4</sup>; Kevin J. Whitehead<sup>5</sup>; Mark L. Kahn<sup>6</sup>; Mark H. Ginsberg<sup>4</sup>; Douglas A. Marchuk<sup>7</sup>; Issam A. Awad<sup>1\*</sup>

### **Affiliations:**

<sup>1</sup> Section of Neurosurgery, The University of Chicago Medicine and Biological Sciences, 5841 S Maryland Chicago, IL, USA (SL, RG, JK, HAZ, DZ, YC, AS, TM, RL, CS, RS, JCP, SP, SR, and IAA);

<sup>2</sup> Center for Research Informatics, The University of Chicago, 900 E. 57th St, Chicago, IL, USA (Y.L.);

<sup>3</sup> From Angioma Alliance Norfolk, VA, USA (AA);

<sup>4</sup> Department of Medicine, University of California San Diego, La Jolla, CA, USA (MLR, MG);

<sup>5</sup> From Division of Cardiology, and Department of Medicine, University of Utah School of Medicine, 50 North Medical Drive Salt Lake City, UT, USA (KJW, DYL);

<sup>6</sup> Department of Medicine and Cardiovascular Institute, University of Pennsylvania, Philadelphia, PA, USA

<sup>7</sup> The Molecular Genetics and Microbiology Department, Duke University Medical Center, Durham, NC, USA

\* To whom correspondence should be addressed: Issam A. Awad, Section of Neurosurgery,  
University of Chicago, 5841 S. Maryland, Chicago, IL 60637 E-mail: [iawad@uchicago.edu](mailto:iawad@uchicago.edu)

† Contributed equally to this work

## Supplemental Figures

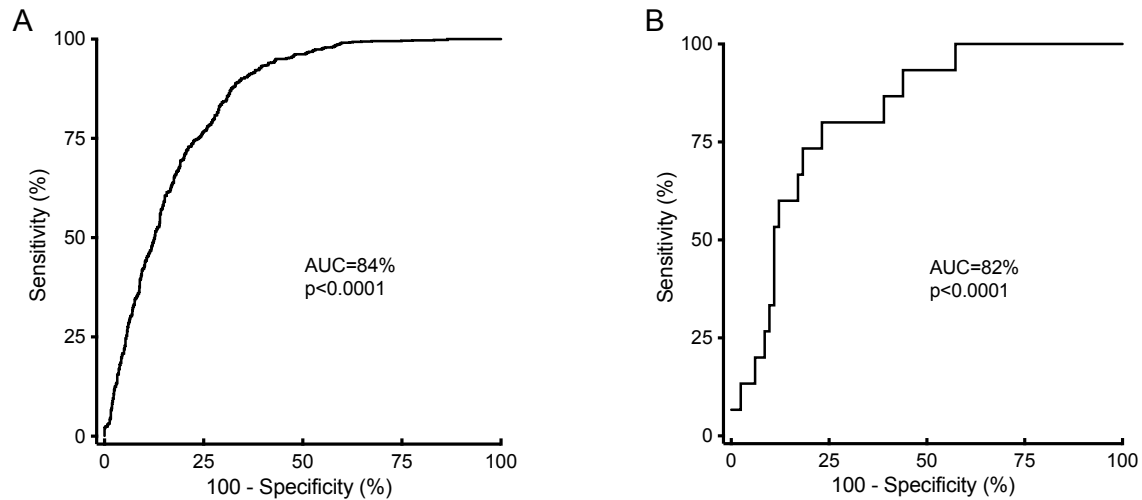

**Supplemental Figure 1** *Statistical validation of diagnostic cavernous angioma with symptomatic hemorrhage (CASH) biomarker* (A) The receiver operating characteristic (ROC) analysis of the simulated cohort generated using Monte-Carlo approach showed 89% sensitivity and 67% specificity (AUC=84%,  $p<0.0001$ ) to differentiate CASH patients. (B) The same ROC analysis of the simulated cohort generated with a repetitive random-sampling validation demonstrated 80% sensitivity and 77% specificity (AUC=82%,  $p<0.0001$ ).

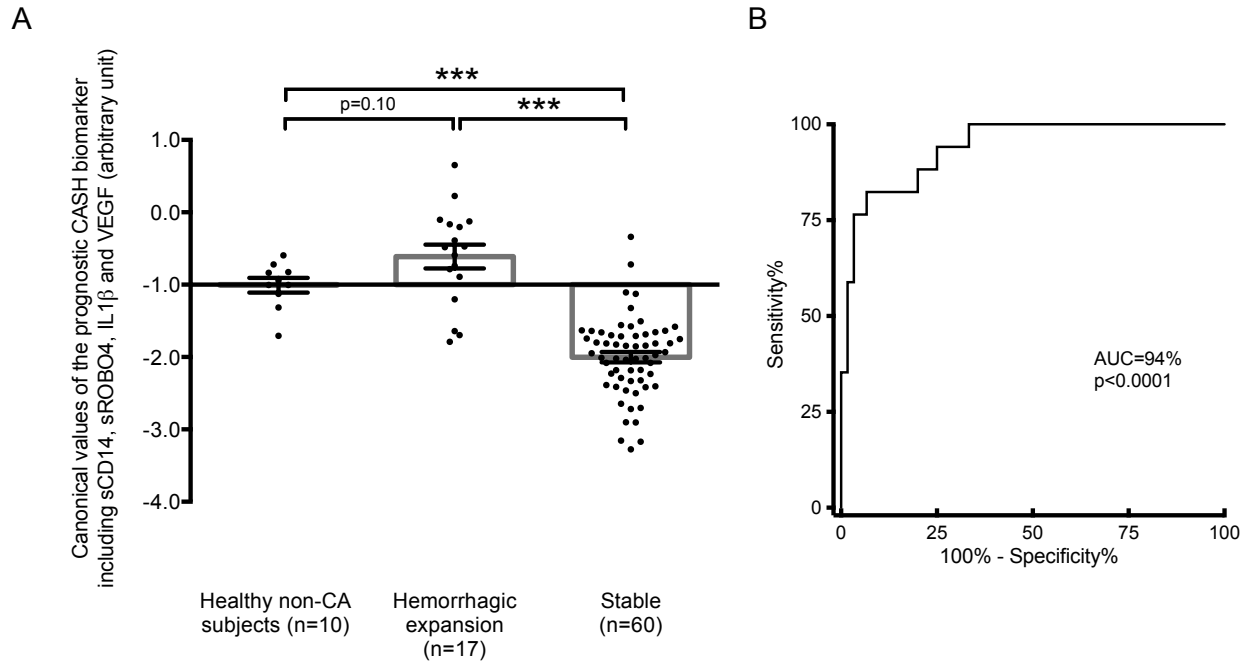

**Supplemental Figure 2** *Validation of the prognostic biomarker in an extended cohort of 77 cavernous angioma patients* (A) A 2 tailed two-sample t-test showed that patients that experienced a hemorrhagic expansion within a year ( $\pm 30$  days) after blood collection (mean estimated value $\pm$ SD= $-0.61\pm 0.68$ ) had higher canonical values than patients that did not experience a subsequent cavernous angioma with symptomatic hemorrhage (CASH) (mean canonical value $\pm$ SD= $-2.00\pm 0.55$ ,  $p<0.0001$ ). In addition, a trend toward lower canonical values ( $p=0.10$ ) was observed in healthy subjects (mean canonical values= $-1.01\pm 0.32$ ) compared to patients that experienced a hemorrhagic expansion within a year ( $\pm 30$  days). Finally, patients that did not experience a subsequent CASH (mean canonical value= $-2.00\pm 0.07$ ) had a lower mean canonical value in comparison to healthy subjects (mean canonical values= $-1.00\pm 0.32$   $p<0.0001$ ). (B) The ROC curve analysis showed 83% sensitivity and 93% specificity (AUC=94%,  $p<0.0001$ ) to predict subsequent hemorrhagic expansion within the year following blood collection ( $\pm 30$  days). \*\*\* $p<0.001$ . Data represent mean $\pm$ SEM.

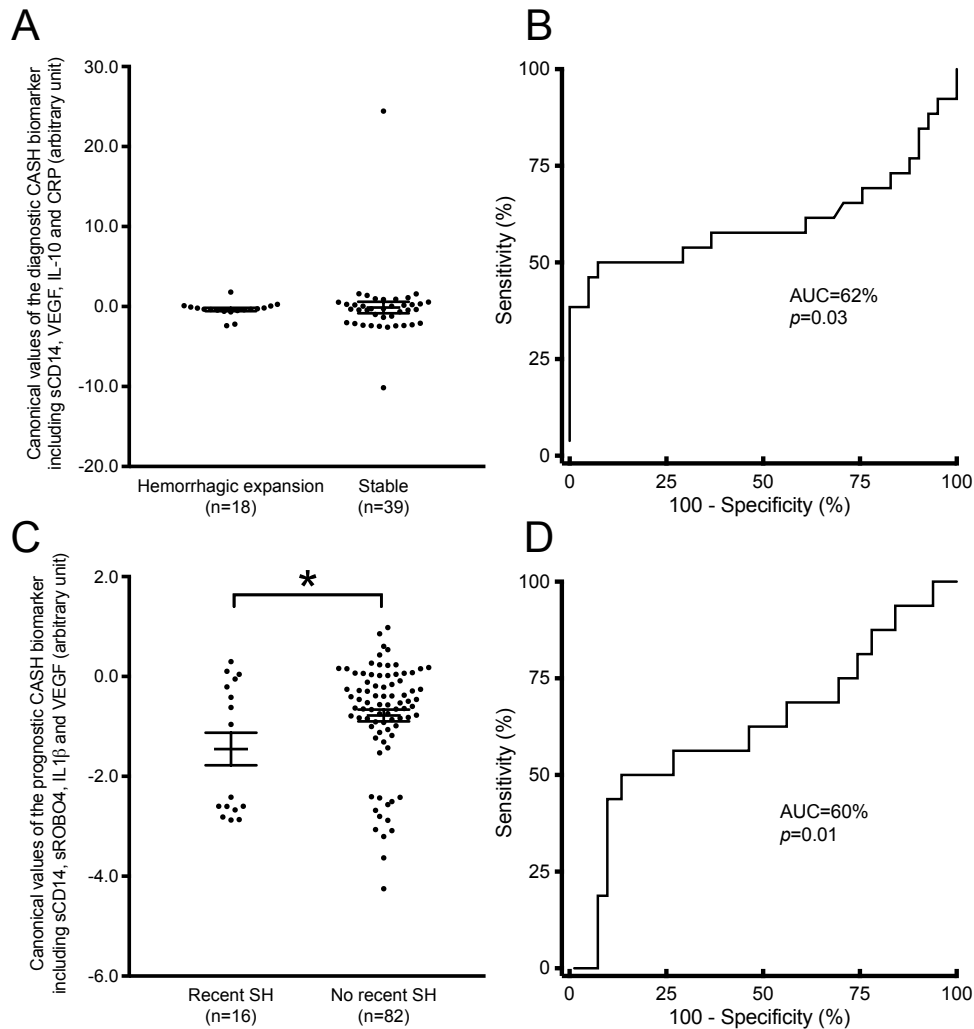

**Supplemental Figure 3** *Cross-comparison of diagnostic and prognostic cavernous angioma*

*with symptomatic hemorrhage (CASH) biomarkers (A)* The canonical values estimated with the prognostic biomarker were not significantly different in CASH patients (n=18; mean estimated value $\pm$ SD=-0.38 $\pm$ 0.89) and those who were not (n=39; mean estimated value=-0.13 $\pm$ 4.5). **(B)**

The receiver operating characteristic (ROC) analysis was not able to differentiate patients who experienced CASH (50% sensitivity, 86% specificity, AUC=62%, p=0.03). **(C)** The estimated canonical values calculated using the CASH biomarker (n=16; mean estimated value $\pm$ SD=-

1.45 $\pm$ 1.3) were higher (p=0.03) in patients that experienced a subsequent hemorrhagic expansion

1.45 $\pm$ 1.3) were higher (p=0.03) in patients that experienced a subsequent hemorrhagic expansion

in the year ( $\pm 30$  days) following the blood collection. **(D)** However, the ROC analysis was not able to differentiate patients well with future hemorrhagic expansion (50% sensitivity, 93% specificity, AUC=60%,  $p=0.01$ ). The difference between canonical values estimated with the prognostic and diagnostic biomarkers were assessed using a two-sample t-test showed. Data represent mean $\pm$ SEM. \* $p<0.05$

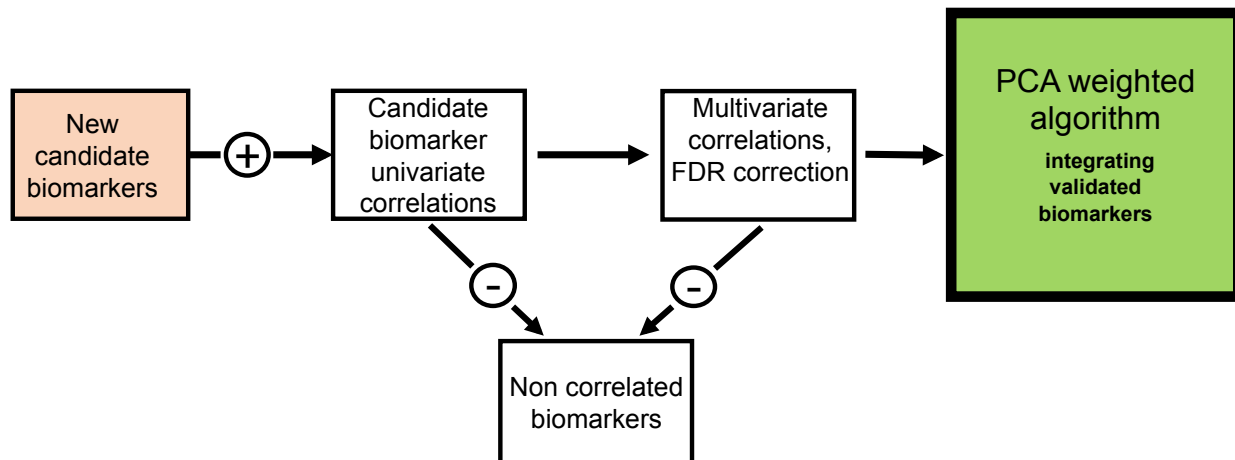

**Supplemental Figure 4** *Bayesian approach to study candidate molecules* Mechanistic targets and differential transcriptomic studies suggest candidate molecules. These candidate molecules are then analyzed for both diagnostic and prognostic clinical behavior in relation to cavernous angioma (CA) disease. The candidate molecules showing clinical associations with CA disease are then integrated in a weighted clustering degree algorithm to test if they improve the biomarkers. The candidate molecule showing no association with CA disease clinical features are discarded. PCA, principal component analysis.

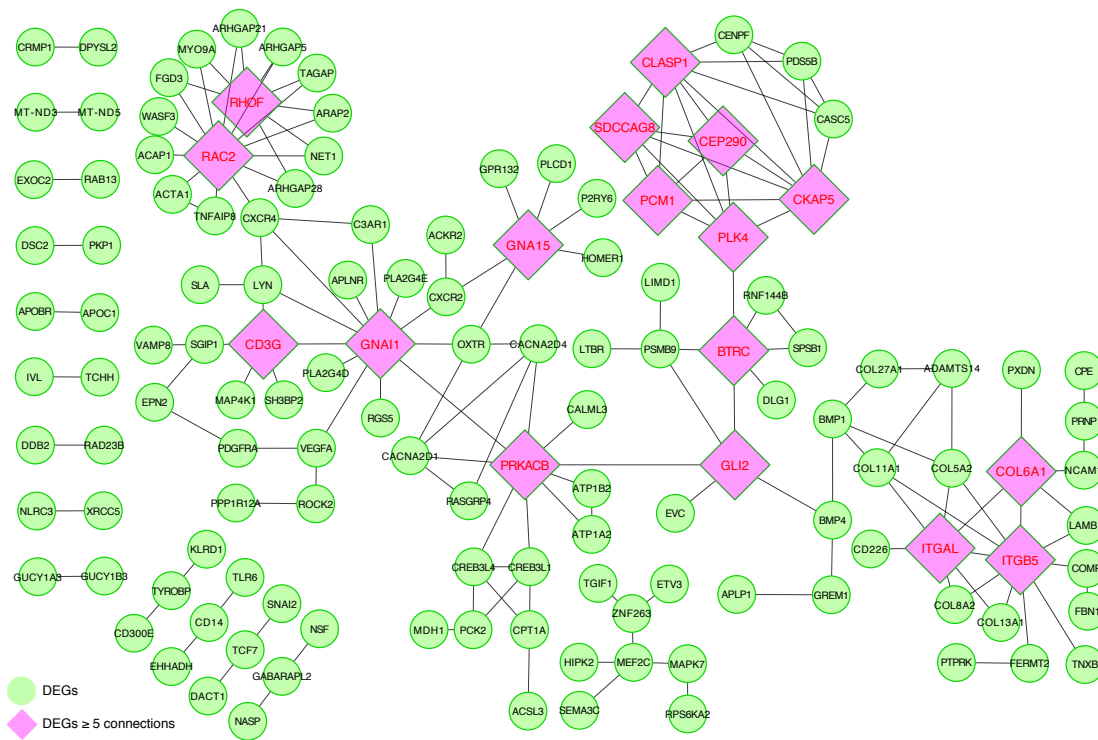

**Supplemental Figure 5** Network analysis of the 398 DEGs only identified in the cavernous angioma with symptomatic hemorrhage (CASH) transcriptome. Among the 398 differentially expressed genes ( $p < 0.05$  FDR corrected) 17 were highly interconnected (five or more connections) including *BTRC*, *COL6A1* and *ITGB5*. Previously documented roles of some of these molecules include TLR4 signaling, apoptosis, and membrane stability. These transcriptomic analyses allow for future studies on highly interconnected genes by analyzing their function specifically in CASH pathogenesis, possible role as a biomarker, or therapeutic targeting following future study.



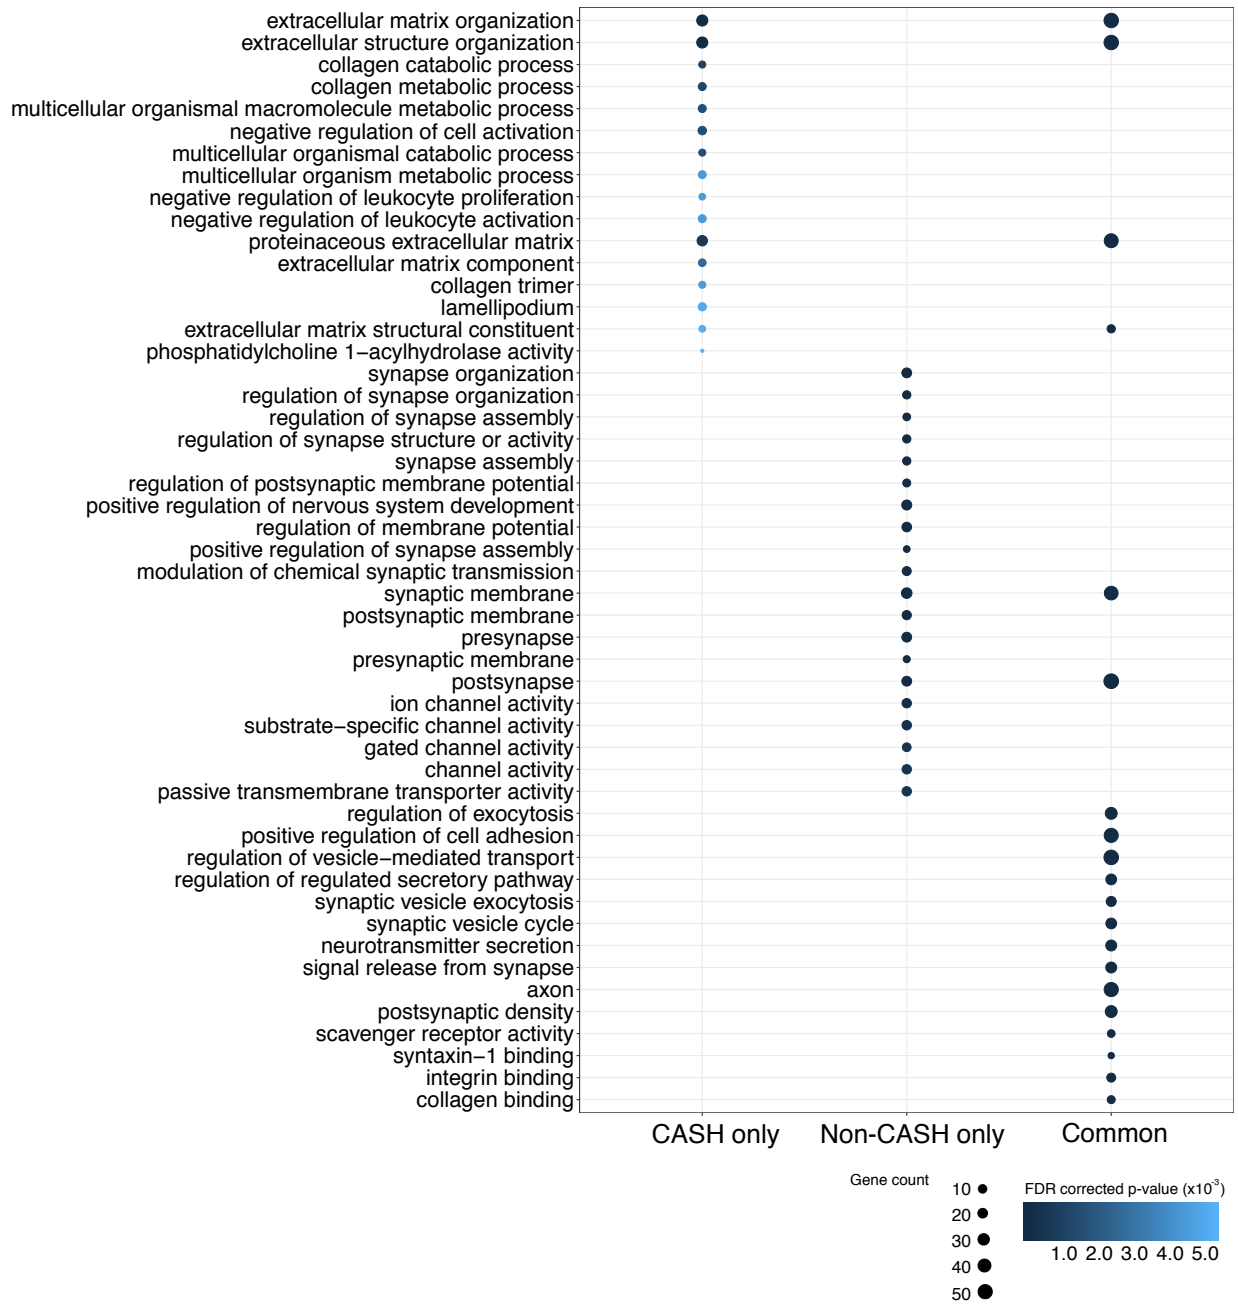

**Supplemental Figure 6** *Top enriched gene ontology (GO) analysis* The GO analysis identified 28 enriched GO terms from the 398 DEGs only found in the CASH transcriptome, 44 enriched GO terms from the 237 differentially expressed genes (DEGs) only found in the non-CASH transcriptome, and 460 enriched GO terms from the common 629 DEGs found in the CASH and non-CASH transcriptome. Demonstrated in the above figure are the top enriched GO terms by p-

value, with a representation of the top ten GO terms for biological processes, top five for molecular function, and top three for cellular component for each group of DEGs ( $p < 0.01$ , FDR corrected).

## Supplemental Tables

**Supplemental Table 1** *Features and demographics of patients with and without plasma follow-up sample*

| Patient characteristics                 | Patients with | Patients without |
|-----------------------------------------|---------------|------------------|
|                                         | Follow-up     | Follow-up        |
| <b>Sample Size</b>                      | 37            | 154              |
| <b>Mean age (years)±SD</b>              | 39.02±18.37   | 38.12±16.50      |
| Range (years)                           | 4.62-76.02    | 3.77-74.95       |
| <b>Sex</b>                              |               |                  |
| Male (%)                                | 12 (32.4)     | 49 (31.8)        |
| Female (%)                              | 25 (67.6)     | 105 (68.2)       |
| <b>Genotype</b>                         |               |                  |
| Familial/Multifocal (%)                 | 14 (37.8)     | 68 (44.1)        |
| CCM1 (%)                                | 8 (57.2)      | 19 (27.9)        |
| CCM2 (%)                                | 1 (7.1)       | 9 (13.2)         |
| CCM3 (%)                                | 2 (14.3)      | 18 (26.5)        |
| Multifocal unknown genotype (%)         | 3 (21.4)      | 22 (32.4)        |
| Sporadic/Solitary (%)                   | 23 (62.2)     | 86 (55.9)        |
| <b>Lesion characteristics</b>           |               |                  |
| Mean number of SWI lesions±SD           | 12.03±18.4    | 12.1±24.5        |
| Mean number of T2 lesions±SD            | 2.89±4.58     | 4.6±10.8         |
| Patients with T2 brainstem lesions (%)* | 18 (48.6)     | 32 (20.8)        |
| Mean number of total hemorrhages±SD     | 1.29±0.69     | 1.78±1.15        |
| <b>Ethnicity</b>                        |               |                  |
| White/Caucasian (%)                     | 29 (78.4)     | 131 (85.1)       |
| African American (%)                    | 2 (5.4)       | 12 (7.8)         |
| Hispanic (%)                            | 3 (8.1)       | 7 (4.5)          |
| Asian (%)                               | 3 (8.1)       | 4 (2.6)          |

\*Denotes significant difference

**Supplemental Table 2** *Correlations of the 18 plasma molecules with cavernous angioma-related clinical parameters*

|                               | Age at inclusion | Sex  | Ethnicity | Phenotype (sporadic/solitary or familial/multifocal) | Brainstem Lesion | SWI Lesions>25 | T2 Lesions>5 | Age at Symptom Onset <18 | Total number of prior hemorrhages |
|-------------------------------|------------------|------|-----------|------------------------------------------------------|------------------|----------------|--------------|--------------------------|-----------------------------------|
| <b>CCL2/MCP1</b>              | 0.02*            | 0.31 | 0.99      | 0.94                                                 | 0.99             | 0.46           | 0.39         | 0.55                     | 0.61                              |
| <b>sCD14</b>                  | 0.34             | 0.69 | 0.16      | 0.58                                                 | 0.99             | 0.79           | 0.13         | 0.21                     | 0.15                              |
| <b>CRP</b>                    | 0.99             | 0.69 | 0.41      | 0.16                                                 | 0.71             | 0.79           | 0.49         | 0.21                     | 0.34                              |
| <b>CXL8/IL-8</b>              | 0.53             | 0.98 | 0.16      | 0.84                                                 | 0.16             | 0.46           | 0.13         | 0.18                     | 0.11                              |
| <b>IL-1<math>\beta</math></b> | 0.93             | 0.98 | 0.16      | 0.83                                                 | 0.99             | 0.84           | 0.57         | 0.47                     | 0.11                              |
| <b>IL-2</b>                   | 0.93             | 0.86 | 0.96      | 0.84                                                 | 0.99             | 0.46           | 0.48         | 0.21                     | 0.10                              |
| <b>IL-6</b>                   | 0.93             | 0.98 | 0.16      | 0.79                                                 | 0.99             | 0.80           | 0.48         | 0.65                     | 0.18                              |
| <b>IL-10</b>                  | 0.52             | 0.31 | 0.80      | 0.55                                                 | 0.99             | 0.80           | 0.48         | 0.54                     | 0.43                              |
| <b>MMP2</b>                   | 0.36             | 0.98 | 0.78      | 0.57                                                 | 0.16             | 0.46           | 0.48         | 0.18                     | 0.67                              |
| <b>MMP9</b>                   | 0.34             | 0.86 | 0.61      | 0.94                                                 | 0.98             | 0.64           | 0.48         | 0.72                     | 0.43                              |
| <b>TNF<math>\alpha</math></b> | 0.93             | 0.98 | 0.16      | 0.79                                                 | 0.99             | 0.46           | 0.48         | 0.18                     | 0.11                              |
| <b>TNFRI</b>                  | 0.01*            | 0.98 | 0.19      | 0.79                                                 | 0.70             | 0.46           | 0.48         | 0.19                     | 0.96                              |
| <b>VEGF</b>                   | 0.11             | 0.98 | 0.78      | 0.94                                                 | 0.99             | 0.46           | 0.48         | 0.27                     | 0.34                              |
| <b>VCAM1</b>                  | 0.93             | 0.32 | 0.99      | 0.16                                                 | 0.99             | 0.64           | 0.94         | 0.65                     | 0.98                              |
| <b>sROBO4</b>                 | 0.78             | 0.98 | 0.99      | 0.79                                                 | 0.99             | 0.90           | 0.84         | 0.67                     | 0.34                              |
| <b>ICAM1</b>                  | 0.93             | 0.69 | 0.61      | 0.94                                                 | 0.99             | 0.64           | 0.48         | 0.80                     | 0.43                              |
| <b>IFN<math>\gamma</math></b> | 0.52             | 0.98 | 0.47      | 0.16                                                 | 0.99             | 0.64           | 0.50         | 0.55                     | 0.98                              |
| <b>Endoglin</b>               | 0.52             | 0.98 | 0.96      | 0.91                                                 | 0.16             | 0.46           | 0.50         | 0.65                     | 0.98                              |

\*p<0.05 denotes statistical significance after FDR correction

**Supplemental Table 3** *Co-correlation between the 9-plasma biomarkers showing an association in CASH patients*

|                               | sCD14   | CRP   | CXCL8/IL-8 | IL-1 $\beta$ | IL-6    | IL-10 | TNF $\alpha$ | TNFRI | VEGF |
|-------------------------------|---------|-------|------------|--------------|---------|-------|--------------|-------|------|
| <b>sCD14</b>                  | 1.00    |       |            |              |         |       |              |       |      |
| <b>CRP</b>                    | -0.09   | 1.00  |            |              |         |       |              |       |      |
| <b>CXCL8/IL-8</b>             | 0.77*** | -0.07 | 1.00       |              |         |       |              |       |      |
| <b>IL-1<math>\beta</math></b> | 0.76*** | -0.12 | 0.80***    | 1.00         |         |       |              |       |      |
| <b>IL-6</b>                   | 0.70*** | -0.05 | 0.72***    | 0.93***      | 1.00    |       |              |       |      |
| <b>IL-10</b>                  | 0.21    | -0.09 | 0.21       | 0.23         | 0.25    | 1.00  |              |       |      |
| <b>TNF<math>\alpha</math></b> | 0.66*** | -0.05 | 0.85***    | 0.74***      | 0.70*** | 0.21  | 1.00         |       |      |
| <b>TNFRI</b>                  | 0.46    | -0.16 | 0.39       | 0.43         | 0.41    | 0.16  | 0.29         | 1.00  |      |
| <b>VEGF</b>                   | 0.33    | 0.03  | 0.26       | 0.30         | 0.29    | 0.12  | 0.23         | 0.21  | 1.00 |

\*\*\*Denotes statistical significance  $p < 0.001$  and  $0.5 < r < 1.0$

**Supplemental Table 4** *Baseline features of resected cavernous angioma patients whose resected lesions were used in transcriptome studies*

|                  | Age | Sex    | Phenotype           | CASH vs. Non-CASH |
|------------------|-----|--------|---------------------|-------------------|
| <b>Lesion 1</b>  | 34  | Female | Sporadic/Solitary   | Non-CASH          |
| <b>Lesion 2</b>  | 40  | Female | Sporadic/Solitary   | Non-CASH          |
| <b>Lesion 3</b>  | 31  | Male   | Sporadic/Solitary   | Non-CASH          |
| <b>Lesion 4</b>  | 51  | Female | Sporadic/Solitary   | Non-CASH          |
| <b>Lesion 5</b>  | 8   | Male   | Familial/Multifocal | Non-CASH          |
| <b>Lesion 6</b>  | 13  | Female | Sporadic/Solitary   | CASH              |
| <b>Lesion 7</b>  | 4   | Female | Familial/Multifocal | CASH              |
| <b>Lesion 8</b>  | 44  | Female | Familial/Multifocal | CASH              |
| <b>Lesion 9</b>  | 52  | Female | Familial/Multifocal | CASH              |
| <b>Lesion 10</b> | 16  | Female | Sporadic/Solitary   | CASH              |

**Supplemental Table 5** 398 differentially expressed genes in the CASH transcriptome

|                 | Mean    | Log2<br>(Fold Change) | LfcSE | Stat  | p-value | p-value<br>(FDR corrected) |
|-----------------|---------|-----------------------|-------|-------|---------|----------------------------|
| <i>SLC43A3</i>  | 78.98   | 3.26                  | 0.70  | 4.66  | 0.000   | 0.000                      |
| <i>GUCY1B3</i>  | 140.43  | -2.79                 | 0.60  | -4.63 | 0.000   | 0.000                      |
| <i>LAMP3</i>    | 64.78   | 4.34                  | 0.96  | 4.54  | 0.000   | 0.001                      |
| <i>GREM1</i>    | 148.60  | 3.58                  | 0.81  | 4.43  | 0.000   | 0.001                      |
| <i>NSF</i>      | 78.41   | -3.31                 | 0.76  | -4.33 | 0.000   | 0.001                      |
| <i>AIM1</i>     | 223.26  | 2.82                  | 0.65  | 4.32  | 0.000   | 0.001                      |
| <i>ABCC1</i>    | 277.47  | 2.11                  | 0.49  | 4.30  | 0.000   | 0.001                      |
| <i>IDS</i>      | 319.76  | -3.17                 | 0.74  | -4.28 | 0.000   | 0.001                      |
| <i>ARHGAP28</i> | 93.98   | 5.35                  | 1.25  | 4.27  | 0.000   | 0.001                      |
| <i>RASGEF1C</i> | 354.58  | 4.33                  | 1.02  | 4.26  | 0.000   | 0.001                      |
| <i>CKAP5</i>    | 237.57  | -1.74                 | 0.41  | -4.22 | 0.000   | 0.002                      |
| <i>GPR174</i>   | 43.84   | 5.11                  | 1.21  | 4.21  | 0.000   | 0.002                      |
| <i>ARL11</i>    | 46.53   | 3.45                  | 0.83  | 4.15  | 0.000   | 0.002                      |
| <i>RUNX2</i>    | 157.52  | 3.30                  | 0.80  | 4.14  | 0.000   | 0.002                      |
| <i>SLC24A1</i>  | 201.70  | 2.34                  | 0.57  | 4.12  | 0.000   | 0.002                      |
| <i>ADAM28</i>   | 159.68  | 2.49                  | 0.60  | 4.11  | 0.000   | 0.002                      |
| <i>GATB</i>     | 141.53  | 2.49                  | 0.61  | 4.11  | 0.000   | 0.002                      |
| <i>CARD16</i>   | 45.03   | 3.91                  | 0.96  | 4.09  | 0.000   | 0.002                      |
| <i>CPE</i>      | 711.07  | -1.52                 | 0.37  | -4.09 | 0.000   | 0.002                      |
| <i>PTPRK</i>    | 302.76  | -1.92                 | 0.47  | -4.08 | 0.000   | 0.002                      |
| <i>LYN</i>      | 191.97  | 1.96                  | 0.48  | 4.07  | 0.000   | 0.002                      |
| <i>EMP3</i>     | 125.51  | 2.88                  | 0.71  | 4.05  | 0.000   | 0.002                      |
| <i>KCP</i>      | 76.38   | 4.93                  | 1.23  | 4.02  | 0.000   | 0.003                      |
| <i>ATPIA2</i>   | 1389.35 | -2.38                 | 0.60  | -3.99 | 0.000   | 0.003                      |
| <i>HEXA</i>     | 194.02  | 1.50                  | 0.38  | 3.98  | 0.000   | 0.003                      |
| <i>MCOLN2</i>   | 27.67   | 4.96                  | 1.25  | 3.96  | 0.000   | 0.003                      |
| <i>PEBP1</i>    | 208.54  | -2.44                 | 0.62  | -3.96 | 0.000   | 0.003                      |
| <i>ATP9A</i>    | 466.23  | -2.39                 | 0.61  | -3.95 | 0.000   | 0.004                      |
| <i>RASGRP4</i>  | 101.81  | 3.45                  | 0.88  | 3.93  | 0.000   | 0.004                      |
| <i>AOC2</i>     | 36.87   | 3.05                  | 0.78  | 3.92  | 0.000   | 0.004                      |
| <i>CDCP1</i>    | 53.72   | 4.09                  | 1.05  | 3.90  | 0.000   | 0.004                      |

|                  |         |       |      |       |       |       |
|------------------|---------|-------|------|-------|-------|-------|
| <i>FAM186B</i>   | 39.73   | 3.40  | 0.88 | 3.88  | 0.000 | 0.004 |
| <i>SERINC1</i>   | 395.57  | -2.30 | 0.59 | -3.88 | 0.000 | 0.004 |
| <i>SORT1</i>     | 613.69  | -2.07 | 0.54 | -3.87 | 0.000 | 0.004 |
| <i>P2RY6</i>     | 54.49   | 4.52  | 1.17 | 3.86  | 0.000 | 0.004 |
| <i>TGIF1</i>     | 175.67  | 2.84  | 0.74 | 3.86  | 0.000 | 0.004 |
| <i>SDS</i>       | 76.72   | 3.38  | 0.88 | 3.85  | 0.000 | 0.005 |
| <i>IL21R</i>     | 79.51   | 3.00  | 0.78 | 3.83  | 0.000 | 0.005 |
| <i>COL11A1</i>   | 677.09  | 3.16  | 0.82 | 3.83  | 0.000 | 0.005 |
| <i>PPP1R12A</i>  | 494.84  | -1.79 | 0.47 | -3.83 | 0.000 | 0.005 |
| <i>UBASH3B</i>   | 121.72  | 2.35  | 0.61 | 3.83  | 0.000 | 0.005 |
| <i>APOBR</i>     | 140.96  | 2.73  | 0.72 | 3.81  | 0.000 | 0.005 |
| <i>SHTN1</i>     | 315.60  | -2.09 | 0.55 | -3.81 | 0.000 | 0.005 |
| <i>KIDINS220</i> | 530.15  | -1.48 | 0.39 | -3.81 | 0.000 | 0.005 |
| <i>IGF2BP1</i>   | 51.19   | 5.57  | 1.46 | 3.80  | 0.000 | 0.005 |
| <i>RG55</i>      | 906.17  | -2.43 | 0.64 | -3.80 | 0.000 | 0.005 |
| <i>SGIP1</i>     | 187.23  | -2.09 | 0.55 | -3.78 | 0.000 | 0.006 |
| <i>CTHRC1</i>    | 86.48   | 3.66  | 0.97 | 3.78  | 0.000 | 0.006 |
| <i>URB2</i>      | 57.38   | 2.31  | 0.61 | 3.78  | 0.000 | 0.006 |
| <i>SPN</i>       | 87.89   | 2.37  | 0.63 | 3.77  | 0.000 | 0.006 |
| <i>ABCG2</i>     | 326.61  | -3.78 | 1.00 | -3.77 | 0.000 | 0.006 |
| <i>UCK2</i>      | 113.41  | 2.30  | 0.61 | 3.77  | 0.000 | 0.006 |
| <i>LAX1</i>      | 51.17   | 4.32  | 1.15 | 3.75  | 0.000 | 0.006 |
| <i>NLRC3</i>     | 77.68   | 2.83  | 0.75 | 3.75  | 0.000 | 0.006 |
| <i>PTGS1</i>     | 117.43  | 2.89  | 0.77 | 3.75  | 0.000 | 0.006 |
| <i>FCMR</i>      | 48.82   | 3.57  | 0.95 | 3.74  | 0.000 | 0.006 |
| <i>AEBPI</i>     | 2341.50 | 2.80  | 0.75 | 3.73  | 0.000 | 0.006 |
| <i>SYNE3</i>     | 271.53  | 1.70  | 0.46 | 3.73  | 0.000 | 0.006 |
| <i>MXII</i>      | 166.40  | -2.18 | 0.59 | -3.72 | 0.000 | 0.007 |
| <i>AKAP11</i>    | 414.17  | -2.39 | 0.64 | -3.71 | 0.000 | 0.007 |
| <i>RHOF</i>      | 103.91  | 3.36  | 0.91 | 3.71  | 0.000 | 0.007 |
| <i>SLC16A3</i>   | 239.83  | 2.44  | 0.66 | 3.70  | 0.000 | 0.007 |
| <i>CPT1A</i>     | 237.66  | -1.58 | 0.43 | -3.69 | 0.000 | 0.007 |
| <i>CALML3</i>    | 31.11   | 5.80  | 1.58 | 3.68  | 0.000 | 0.007 |
| <i>KRT8</i>      | 72.36   | 3.61  | 0.98 | 3.68  | 0.000 | 0.007 |
| <i>BMPI</i>      | 199.46  | 2.04  | 0.55 | 3.68  | 0.000 | 0.007 |



|                 |         |       |      |       |       |       |
|-----------------|---------|-------|------|-------|-------|-------|
| <i>CACNA2D1</i> | 98.83   | -2.38 | 0.65 | -3.67 | 0.000 | 0.007 |
| <i>ATP1B2</i>   | 241.69  | -2.48 | 0.68 | -3.67 | 0.000 | 0.007 |
| <i>LOXL2</i>    | 327.16  | 2.90  | 0.79 | 3.66  | 0.000 | 0.008 |
| <i>FGD3</i>     | 136.04  | 2.83  | 0.78 | 3.65  | 0.000 | 0.008 |
| <i>EMILIN1</i>  | 293.54  | 2.25  | 0.62 | 3.64  | 0.000 | 0.008 |
| <i>KLK6</i>     | 68.11   | 3.16  | 0.87 | 3.65  | 0.000 | 0.008 |
| <i>SLCO2A1</i>  | 225.13  | 3.19  | 0.87 | 3.64  | 0.000 | 0.008 |
| <i>CCSAP</i>    | 137.37  | -2.32 | 0.64 | -3.62 | 0.000 | 0.009 |
| <i>ZNF707</i>   | 88.71   | 3.11  | 0.86 | 3.62  | 0.000 | 0.009 |
| <i>VEGFA</i>    | 560.52  | 2.30  | 0.64 | 3.61  | 0.000 | 0.009 |
| <i>PJA2</i>     | 438.40  | -2.13 | 0.59 | -3.61 | 0.000 | 0.009 |
| <i>TJPI</i>     | 1162.90 | -1.89 | 0.52 | -3.60 | 0.000 | 0.009 |
| <i>WASF3</i>    | 123.06  | -2.87 | 0.80 | -3.60 | 0.000 | 0.009 |
| <i>VDR</i>      | 69.31   | 3.47  | 0.96 | 3.60  | 0.000 | 0.009 |
| <i>ATG9B</i>    | 92.90   | 4.52  | 1.26 | 3.60  | 0.000 | 0.009 |
| <i>FAH</i>      | 59.73   | 2.60  | 0.72 | 3.59  | 0.000 | 0.009 |
| <i>SLC38A7</i>  | 165.36  | 2.59  | 0.72 | 3.57  | 0.000 | 0.010 |
| <i>PDS5B</i>    | 258.48  | -2.16 | 0.61 | -3.56 | 0.000 | 0.010 |
| <i>MFSD6</i>    | 173.75  | -1.80 | 0.51 | -3.56 | 0.000 | 0.010 |
| <i>PDLIM2</i>   | 117.82  | 2.55  | 0.72 | 3.55  | 0.000 | 0.010 |
| <i>PFN2</i>     | 86.35   | -2.93 | 0.82 | -3.55 | 0.000 | 0.010 |
| <i>AOAH</i>     | 79.00   | 1.95  | 0.55 | 3.55  | 0.000 | 0.010 |
| <i>HOMER1</i>   | 91.60   | -2.06 | 0.58 | -3.54 | 0.000 | 0.010 |
| <i>NASP</i>     | 289.64  | -1.62 | 0.46 | -3.54 | 0.000 | 0.011 |
| <i>PATL2</i>    | 52.69   | 3.20  | 0.91 | 3.54  | 0.000 | 0.011 |
| <i>ZNF263</i>   | 143.89  | 1.68  | 0.47 | 3.53  | 0.000 | 0.011 |
| <i>ARHGAP21</i> | 526.03  | -1.82 | 0.52 | -3.53 | 0.000 | 0.011 |
| <i>NTRK2</i>    | 608.35  | -2.27 | 0.64 | -3.52 | 0.000 | 0.011 |
| <i>CILP2</i>    | 49.12   | 3.79  | 1.08 | 3.52  | 0.000 | 0.011 |
| <i>GPR157</i>   | 138.17  | 3.87  | 1.10 | 3.52  | 0.000 | 0.011 |
| <i>MAP4K1</i>   | 77.46   | 2.63  | 0.75 | 3.52  | 0.000 | 0.011 |
| <i>SH3RF3</i>   | 216.42  | 1.32  | 0.38 | 3.51  | 0.000 | 0.012 |
| <i>ZDHHC24</i>  | 76.37   | 1.96  | 0.56 | 3.50  | 0.000 | 0.012 |
| <i>PDE2A</i>    | 148.73  | -2.47 | 0.71 | -3.49 | 0.000 | 0.012 |
| <i>TMEM201</i>  | 108.44  | 1.72  | 0.49 | 3.49  | 0.000 | 0.012 |

|                 |         |       |      |       |       |       |
|-----------------|---------|-------|------|-------|-------|-------|
| <i>TYROBP</i>   | 219.27  | 2.76  | 0.79 | 3.49  | 0.000 | 0.012 |
| <i>HCN2</i>     | 66.84   | -3.23 | 0.92 | -3.49 | 0.000 | 0.012 |
| <i>MSANTD1</i>  | 65.40   | 2.67  | 0.77 | 3.49  | 0.000 | 0.012 |
| <i>SCML1</i>    | 320.70  | 3.58  | 1.03 | 3.48  | 0.000 | 0.012 |
| <i>PLA2G4D</i>  | 40.30   | 5.49  | 1.58 | 3.48  | 0.001 | 0.013 |
| <i>PIGB</i>     | 47.40   | 2.85  | 0.82 | 3.47  | 0.001 | 0.013 |
| <i>TLR6</i>     | 50.18   | 2.60  | 0.75 | 3.46  | 0.001 | 0.013 |
| <i>MDGA1</i>    | 187.94  | 2.23  | 0.65 | 3.45  | 0.001 | 0.013 |
| <i>SOX4</i>     | 146.41  | 2.30  | 0.67 | 3.45  | 0.001 | 0.013 |
| <i>VAMP8</i>    | 61.94   | 3.13  | 0.91 | 3.45  | 0.001 | 0.014 |
| <i>AOX1</i>     | 45.66   | 3.87  | 1.12 | 3.45  | 0.001 | 0.014 |
| <i>MMP11</i>    | 72.93   | 3.65  | 1.06 | 3.45  | 0.001 | 0.014 |
| <i>CREB3L1</i>  | 81.95   | 3.07  | 0.89 | 3.44  | 0.001 | 0.014 |
| <i>VWA8</i>     | 128.03  | -1.60 | 0.46 | -3.44 | 0.001 | 0.014 |
| <i>CIDEB</i>    | 65.06   | 2.44  | 0.71 | 3.43  | 0.001 | 0.014 |
| <i>CCDC85C</i>  | 135.34  | 1.90  | 0.56 | 3.42  | 0.001 | 0.015 |
| <i>KIAA1683</i> | 131.39  | 2.68  | 0.78 | 3.42  | 0.001 | 0.015 |
| <i>ITGAL</i>    | 181.43  | 1.97  | 0.58 | 3.42  | 0.001 | 0.015 |
| <i>TCHH</i>     | 1120.34 | 4.62  | 1.35 | 3.41  | 0.001 | 0.015 |
| <i>VENTX</i>    | 29.85   | 3.23  | 0.95 | 3.41  | 0.001 | 0.015 |
| <i>MT-ATP6</i>  | 5999.28 | 2.17  | 0.64 | 3.41  | 0.001 | 0.015 |
| <i>COL6A1</i>   | 2251.87 | 2.70  | 0.79 | 3.41  | 0.001 | 0.015 |
| <i>TMEM200A</i> | 68.11   | 2.96  | 0.87 | 3.41  | 0.001 | 0.015 |
| <i>MYO9A</i>    | 390.07  | -1.40 | 0.41 | -3.40 | 0.001 | 0.015 |
| <i>PDPN</i>     | 71.60   | 2.76  | 0.81 | 3.40  | 0.001 | 0.015 |
| <i>KIF5B</i>    | 867.47  | -1.63 | 0.48 | -3.40 | 0.001 | 0.015 |
| <i>BMP4</i>     | 42.38   | 3.03  | 0.89 | 3.40  | 0.001 | 0.015 |
| <i>SYNE2</i>    | 1150.77 | -1.67 | 0.49 | -3.39 | 0.001 | 0.016 |
| <i>CLASPI</i>   | 332.31  | -1.28 | 0.38 | -3.39 | 0.001 | 0.016 |
| <i>SPOCD1</i>   | 64.58   | 4.59  | 1.35 | 3.39  | 0.001 | 0.016 |
| <i>SLC9A8</i>   | 146.57  | 1.61  | 0.47 | 3.39  | 0.001 | 0.016 |
| <i>CENPF</i>    | 119.40  | 2.40  | 0.71 | 3.39  | 0.001 | 0.016 |
| <i>SGTB</i>     | 79.88   | -2.59 | 0.76 | -3.38 | 0.001 | 0.016 |
| <i>IFNLRI</i>   | 61.56   | 3.10  | 0.92 | 3.38  | 0.001 | 0.016 |
| <i>DLG1</i>     | 348.57  | -1.41 | 0.42 | -3.37 | 0.001 | 0.016 |

|                 |         |       |      |       |       |       |
|-----------------|---------|-------|------|-------|-------|-------|
| <i>DPYSL2</i>   | 1047.13 | -1.85 | 0.55 | -3.37 | 0.001 | 0.016 |
| <i>NUP210L</i>  | 39.95   | 4.03  | 1.20 | 3.37  | 0.001 | 0.017 |
| <i>MUC2</i>     | 97.51   | 4.10  | 1.22 | 3.36  | 0.001 | 0.017 |
| <i>PTGFRN</i>   | 147.22  | 2.00  | 0.60 | 3.35  | 0.001 | 0.017 |
| <i>SLC12A9</i>  | 132.55  | 1.96  | 0.58 | 3.35  | 0.001 | 0.017 |
| <i>CIQTNF6</i>  | 69.82   | 2.88  | 0.86 | 3.35  | 0.001 | 0.017 |
| <i>LCP1</i>     | 399.99  | 1.98  | 0.59 | 3.35  | 0.001 | 0.017 |
| <i>MUC1</i>     | 46.86   | 3.19  | 0.95 | 3.35  | 0.001 | 0.017 |
| <i>NLRCS</i>    | 341.09  | 1.74  | 0.52 | 3.35  | 0.001 | 0.017 |
| <i>PKP1</i>     | 70.15   | 4.27  | 1.27 | 3.35  | 0.001 | 0.018 |
| <i>ACKR2</i>    | 42.35   | 2.90  | 0.87 | 3.34  | 0.001 | 0.018 |
| <i>SDCCAG8</i>  | 192.13  | -1.74 | 0.52 | -3.34 | 0.001 | 0.018 |
| <i>DOCK9</i>    | 864.31  | -2.27 | 0.68 | -3.34 | 0.001 | 0.018 |
| <i>IGSF22</i>   | 58.51   | 4.56  | 1.37 | 3.34  | 0.001 | 0.018 |
| <i>GDF15</i>    | 41.64   | 3.11  | 0.93 | 3.33  | 0.001 | 0.018 |
| <i>UTP15</i>    | 101.02  | 2.85  | 0.86 | 3.33  | 0.001 | 0.018 |
| <i>COL13A1</i>  | 116.10  | 2.60  | 0.78 | 3.33  | 0.001 | 0.018 |
| <i>BTRC</i>     | 137.02  | -1.54 | 0.46 | -3.32 | 0.001 | 0.019 |
| <i>CAPG</i>     | 136.88  | 2.45  | 0.74 | 3.32  | 0.001 | 0.019 |
| <i>HES4</i>     | 51.57   | -2.71 | 0.82 | -3.32 | 0.001 | 0.019 |
| <i>P2RX1</i>    | 39.30   | 3.07  | 0.92 | 3.32  | 0.001 | 0.019 |
| <i>FHDC1</i>    | 59.92   | 2.35  | 0.71 | 3.31  | 0.001 | 0.019 |
| <i>PRG4</i>     | 44.63   | 4.75  | 1.44 | 3.31  | 0.001 | 0.019 |
| <i>RNF144B</i>  | 178.82  | -1.64 | 0.50 | -3.31 | 0.001 | 0.019 |
| <i>HERC1</i>    | 715.94  | -1.42 | 0.43 | -3.30 | 0.001 | 0.019 |
| <i>SEMA4A</i>   | 163.41  | 2.69  | 0.82 | 3.30  | 0.001 | 0.019 |
| <i>CTSK</i>     | 65.12   | 3.19  | 0.97 | 3.30  | 0.001 | 0.019 |
| <i>SLC39A11</i> | 105.05  | 2.03  | 0.62 | 3.30  | 0.001 | 0.019 |
| <i>CRMP1</i>    | 81.73   | -2.37 | 0.72 | -3.29 | 0.001 | 0.020 |
| <i>INSRR</i>    | 57.86   | 3.42  | 1.04 | 3.29  | 0.001 | 0.020 |
| <i>MICU3</i>    | 44.29   | -2.70 | 0.82 | -3.29 | 0.001 | 0.020 |
| <i>PLCD1</i>    | 181.41  | 2.95  | 0.90 | 3.29  | 0.001 | 0.020 |
| <i>MTCH1</i>    | 213.45  | -1.80 | 0.55 | -3.29 | 0.001 | 0.020 |
| <i>EPN2</i>     | 175.53  | -1.34 | 0.41 | -3.29 | 0.001 | 0.020 |
| <i>HOXB3</i>    | 45.93   | 3.81  | 1.16 | 3.29  | 0.001 | 0.020 |

|                     |         |       |      |       |       |       |
|---------------------|---------|-------|------|-------|-------|-------|
| <i>ACTA1</i>        | 40.08   | 4.00  | 1.22 | 3.28  | 0.001 | 0.020 |
| <i>CTD-3088G3.8</i> | 97.00   | 2.54  | 0.77 | 3.28  | 0.001 | 0.020 |
| <i>UBASH3A</i>      | 53.87   | 4.77  | 1.46 | 3.28  | 0.001 | 0.020 |
| <i>ATP12A</i>       | 101.53  | 5.73  | 1.75 | 3.28  | 0.001 | 0.021 |
| <i>RAC2</i>         | 91.04   | 2.69  | 0.82 | 3.27  | 0.001 | 0.021 |
| <i>IL4I1</i>        | 66.62   | 3.53  | 1.08 | 3.27  | 0.001 | 0.021 |
| <i>APOC1</i>        | 41.91   | 3.08  | 0.94 | 3.27  | 0.001 | 0.021 |
| <i>MPRIP</i>        | 1174.39 | -1.37 | 0.42 | -3.27 | 0.001 | 0.021 |
| <i>SLC17A9</i>      | 38.72   | 2.66  | 0.82 | 3.26  | 0.001 | 0.022 |
| <i>RAD23B</i>       | 261.28  | -1.64 | 0.51 | -3.25 | 0.001 | 0.022 |
| <i>GLMP</i>         | 74.31   | 2.36  | 0.72 | 3.25  | 0.001 | 0.022 |
| <i>PRF1</i>         | 36.83   | 3.35  | 1.03 | 3.25  | 0.001 | 0.022 |
| <i>KLHL2</i>        | 84.24   | -1.91 | 0.59 | -3.25 | 0.001 | 0.022 |
| <i>TRIAP1</i>       | 41.49   | 2.97  | 0.92 | 3.25  | 0.001 | 0.022 |
| <i>C19orf68</i>     | 135.11  | 2.35  | 0.72 | 3.25  | 0.001 | 0.022 |
| <i>CACNA2D4</i>     | 76.44   | 2.91  | 0.90 | 3.24  | 0.001 | 0.022 |
| <i>NAPIL4</i>       | 263.28  | -1.31 | 0.40 | -3.24 | 0.001 | 0.023 |
| <i>DNAAF5</i>       | 88.07   | 1.99  | 0.62 | 3.23  | 0.001 | 0.023 |
| <i>GABARAPL2</i>    | 151.65  | -1.67 | 0.52 | -3.23 | 0.001 | 0.023 |
| <i>MGEA5</i>        | 588.97  | -1.40 | 0.44 | -3.22 | 0.001 | 0.024 |
| <i>LAG3</i>         | 32.50   | 3.43  | 1.07 | 3.22  | 0.001 | 0.024 |
| <i>FMNL2</i>        | 449.94  | -1.53 | 0.47 | -3.22 | 0.001 | 0.024 |
| <i>MT-ND3</i>       | 1880.85 | 2.11  | 0.65 | 3.22  | 0.001 | 0.024 |
| <i>LAMB1</i>        | 576.48  | 2.05  | 0.64 | 3.21  | 0.001 | 0.024 |
| <i>RCN3</i>         | 172.62  | 2.45  | 0.76 | 3.21  | 0.001 | 0.024 |
| <i>MARK1</i>        | 64.81   | -2.65 | 0.83 | -3.21 | 0.001 | 0.024 |
| <i>MDH1</i>         | 109.78  | -1.95 | 0.61 | -3.21 | 0.001 | 0.024 |
| <i>RAB13</i>        | 207.49  | 1.73  | 0.54 | 3.21  | 0.001 | 0.024 |
| <i>RUFY3</i>        | 322.91  | -1.43 | 0.44 | -3.21 | 0.001 | 0.024 |
| <i>SLA</i>          | 187.98  | 2.16  | 0.67 | 3.21  | 0.001 | 0.024 |
| <i>SLC8B1</i>       | 145.34  | 1.38  | 0.43 | 3.21  | 0.001 | 0.024 |
| <i>CD37</i>         | 135.81  | 2.03  | 0.63 | 3.20  | 0.001 | 0.024 |
| <i>MEF2C</i>        | 433.36  | -1.75 | 0.55 | -3.20 | 0.001 | 0.025 |
| <i>PLK4</i>         | 34.22   | 3.09  | 0.97 | 3.20  | 0.001 | 0.025 |
| <i>CD14</i>         | 194.83  | 2.14  | 0.67 | 3.20  | 0.001 | 0.025 |

|                 |         |       |      |       |       |       |
|-----------------|---------|-------|------|-------|-------|-------|
| <i>CD3G</i>     | 20.26   | 3.54  | 1.11 | 3.19  | 0.001 | 0.025 |
| <i>CXCR4</i>    | 89.97   | 2.63  | 0.83 | 3.19  | 0.001 | 0.025 |
| <i>PCDH12</i>   | 135.48  | 2.18  | 0.68 | 3.19  | 0.001 | 0.025 |
| <i>SLC39A10</i> | 193.78  | -2.11 | 0.66 | -3.19 | 0.001 | 0.025 |
| <i>CXCR2</i>    | 56.98   | 4.39  | 1.38 | 3.19  | 0.001 | 0.025 |
| <i>TBC1D10C</i> | 54.46   | 2.79  | 0.87 | 3.19  | 0.001 | 0.025 |
| <i>GUCY1A3</i>  | 216.00  | -1.73 | 0.54 | -3.19 | 0.001 | 0.025 |
| <i>ZMYND15</i>  | 69.60   | 2.50  | 0.78 | 3.19  | 0.001 | 0.025 |
| <i>TBL2</i>     | 96.34   | 1.75  | 0.55 | 3.19  | 0.001 | 0.025 |
| <i>NAP1L3</i>   | 57.28   | -2.94 | 0.92 | -3.18 | 0.001 | 0.025 |
| <i>CCDC102B</i> | 199.30  | 2.10  | 0.66 | 3.18  | 0.001 | 0.025 |
| <i>UBR3</i>     | 242.11  | -1.50 | 0.47 | -3.18 | 0.001 | 0.026 |
| <i>PLA2G4E</i>  | 56.81   | 6.39  | 2.01 | 3.18  | 0.001 | 0.026 |
| <i>PSMB9</i>    | 52.58   | 2.96  | 0.93 | 3.17  | 0.002 | 0.027 |
| <i>GDAP1</i>    | 64.33   | -3.02 | 0.96 | -3.16 | 0.002 | 0.027 |
| <i>CASC4</i>    | 252.04  | -1.48 | 0.47 | -3.16 | 0.002 | 0.027 |
| <i>RREB1</i>    | 488.78  | 1.40  | 0.44 | 3.16  | 0.002 | 0.027 |
| <i>FBN1</i>     | 763.24  | 2.00  | 0.63 | 3.16  | 0.002 | 0.027 |
| <i>KLRD1</i>    | 58.04   | 2.52  | 0.80 | 3.16  | 0.002 | 0.027 |
| <i>FCHSD1</i>   | 371.36  | 2.31  | 0.73 | 3.16  | 0.002 | 0.027 |
| <i>MBNL2</i>    | 214.99  | -2.54 | 0.80 | -3.16 | 0.002 | 0.027 |
| <i>CASC5</i>    | 62.65   | 2.98  | 0.95 | 3.16  | 0.002 | 0.027 |
| <i>SEPT7</i>    | 442.86  | -1.76 | 0.56 | -3.15 | 0.002 | 0.028 |
| <i>BEX2</i>     | 33.77   | -4.00 | 1.27 | -3.15 | 0.002 | 0.028 |
| <i>C5orf63</i>  | 53.07   | 3.18  | 1.01 | 3.14  | 0.002 | 0.028 |
| <i>GAS1</i>     | 57.39   | 2.95  | 0.94 | 3.14  | 0.002 | 0.028 |
| <i>KIAA1109</i> | 869.68  | -1.75 | 0.56 | -3.14 | 0.002 | 0.028 |
| <i>SCAPER</i>   | 227.13  | -1.84 | 0.58 | -3.14 | 0.002 | 0.028 |
| <i>FERMT2</i>   | 203.61  | -1.54 | 0.49 | -3.14 | 0.002 | 0.028 |
| <i>SPSB1</i>    | 94.54   | 2.47  | 0.79 | 3.14  | 0.002 | 0.028 |
| <i>LIMD1</i>    | 143.24  | 1.50  | 0.48 | 3.14  | 0.002 | 0.028 |
| <i>TOM1L2</i>   | 217.55  | -1.62 | 0.52 | -3.14 | 0.002 | 0.028 |
| <i>SLC25A45</i> | 74.16   | 2.61  | 0.83 | 3.13  | 0.002 | 0.029 |
| <i>HIPK2</i>    | 1319.57 | -1.66 | 0.53 | -3.13 | 0.002 | 0.029 |
| <i>SHOC2</i>    | 142.25  | -2.06 | 0.66 | -3.13 | 0.002 | 0.029 |

|                  |         |       |      |       |       |       |
|------------------|---------|-------|------|-------|-------|-------|
| <i>ACAP1</i>     | 95.44   | 2.46  | 0.79 | 3.12  | 0.002 | 0.029 |
| <i>DSTN</i>      | 324.55  | -1.90 | 0.61 | -3.12 | 0.002 | 0.029 |
| <i>PLCXD2</i>    | 102.80  | 2.14  | 0.69 | 3.12  | 0.002 | 0.030 |
| <i>ALDH1A3</i>   | 74.59   | 1.94  | 0.62 | 3.12  | 0.002 | 0.030 |
| <i>ALDH1B1</i>   | 44.07   | 3.17  | 1.02 | 3.11  | 0.002 | 0.030 |
| <i>CYP4F22</i>   | 29.81   | 5.68  | 1.82 | 3.11  | 0.002 | 0.030 |
| <i>HINT1</i>     | 68.94   | -2.65 | 0.85 | -3.11 | 0.002 | 0.030 |
| <i>MED29</i>     | 111.67  | -1.53 | 0.49 | -3.11 | 0.002 | 0.030 |
| <i>CCDC33</i>    | 93.04   | 6.40  | 2.06 | 3.11  | 0.002 | 0.030 |
| <i>SLC13A4</i>   | 72.18   | 3.91  | 1.26 | 3.11  | 0.002 | 0.030 |
| <i>MORC3</i>     | 159.02  | -1.43 | 0.46 | -3.11 | 0.002 | 0.030 |
| <i>PCMI</i>      | 818.26  | -1.58 | 0.51 | -3.11 | 0.002 | 0.030 |
| <i>CNTN1</i>     | 167.13  | -2.20 | 0.71 | -3.11 | 0.002 | 0.030 |
| <i>AHNAK2</i>    | 747.38  | 1.62  | 0.52 | 3.10  | 0.002 | 0.031 |
| <i>MYRIP</i>     | 153.83  | -1.92 | 0.62 | -3.10 | 0.002 | 0.031 |
| <i>PRKACB</i>    | 225.61  | -2.66 | 0.86 | -3.10 | 0.002 | 0.031 |
| <i>IGSF6</i>     | 50.17   | 3.02  | 0.97 | 3.10  | 0.002 | 0.031 |
| <i>PLA2G16</i>   | 101.03  | -1.78 | 0.57 | -3.10 | 0.002 | 0.031 |
| <i>UBXN11</i>    | 118.48  | 1.51  | 0.49 | 3.10  | 0.002 | 0.031 |
| <i>COL5A2</i>    | 676.81  | 2.80  | 0.90 | 3.10  | 0.002 | 0.031 |
| <i>TTN</i>       | 1562.28 | 2.10  | 0.68 | 3.10  | 0.002 | 0.031 |
| <i>ORAI2</i>     | 169.28  | 1.95  | 0.63 | 3.09  | 0.002 | 0.031 |
| <i>OXTR</i>      | 46.96   | 2.84  | 0.92 | 3.09  | 0.002 | 0.031 |
| <i>GNAI1</i>     | 56.72   | -2.57 | 0.83 | -3.09 | 0.002 | 0.031 |
| <i>SEMA3C</i>    | 150.81  | 2.45  | 0.80 | 3.09  | 0.002 | 0.032 |
| <i>SECISBP2L</i> | 341.06  | -1.76 | 0.57 | -3.08 | 0.002 | 0.032 |
| <i>RAB11FIP4</i> | 207.44  | -2.18 | 0.71 | -3.08 | 0.002 | 0.032 |
| <i>ETV3</i>      | 203.75  | 1.29  | 0.42 | 3.08  | 0.002 | 0.032 |
| <i>FLG2</i>      | 241.72  | 5.68  | 1.85 | 3.07  | 0.002 | 0.033 |
| <i>SH3BP2</i>    | 513.18  | 1.34  | 0.44 | 3.07  | 0.002 | 0.033 |
| <i>CASKINI</i>   | 93.61   | -2.96 | 0.96 | -3.07 | 0.002 | 0.033 |
| <i>MDN1</i>      | 580.32  | -1.14 | 0.37 | -3.07 | 0.002 | 0.033 |
| <i>CD226</i>     | 80.24   | 2.56  | 0.83 | 3.07  | 0.002 | 0.033 |
| <i>NET1</i>      | 235.70  | -2.18 | 0.71 | -3.07 | 0.002 | 0.033 |
| <i>TNFAIP8</i>   | 96.23   | 2.30  | 0.75 | 3.06  | 0.002 | 0.034 |

|                 |         |       |      |       |       |       |
|-----------------|---------|-------|------|-------|-------|-------|
| <i>TNXB</i>     | 1129.91 | 1.62  | 0.53 | 3.06  | 0.002 | 0.034 |
| <i>LST1</i>     | 86.53   | 2.53  | 0.83 | 3.06  | 0.002 | 0.034 |
| <i>BEX4</i>     | 84.15   | -2.35 | 0.77 | -3.05 | 0.002 | 0.034 |
| <i>PDE7A</i>    | 116.34  | 2.12  | 0.69 | 3.05  | 0.002 | 0.034 |
| <i>ADAMTS15</i> | 62.98   | 2.46  | 0.81 | 3.05  | 0.002 | 0.035 |
| <i>DNMIL</i>    | 156.01  | -1.42 | 0.47 | -3.05 | 0.002 | 0.035 |
| <i>POSTN</i>    | 441.41  | 4.59  | 1.50 | 3.05  | 0.002 | 0.035 |
| <i>GPRC5B</i>   | 394.78  | -1.81 | 0.60 | -3.04 | 0.002 | 0.035 |
| <i>ZIC4</i>     | 80.63   | 2.34  | 0.77 | 3.04  | 0.002 | 0.035 |
| <i>ANKRD26</i>  | 154.52  | -2.01 | 0.66 | -3.03 | 0.002 | 0.036 |
| <i>ARGLU1</i>   | 599.44  | -1.59 | 0.53 | -3.03 | 0.002 | 0.036 |
| <i>BTBD10</i>   | 70.50   | -2.08 | 0.69 | -3.03 | 0.002 | 0.036 |
| <i>RPS6KA2</i>  | 338.96  | -1.34 | 0.44 | -3.03 | 0.002 | 0.036 |
| <i>ZNF831</i>   | 133.82  | 2.33  | 0.77 | 3.03  | 0.002 | 0.036 |
| <i>ADAMTS14</i> | 49.90   | 2.56  | 0.85 | 3.03  | 0.002 | 0.036 |
| <i>APLP1</i>    | 238.07  | -2.34 | 0.77 | -3.03 | 0.002 | 0.036 |
| <i>MUC16</i>    | 428.98  | 7.12  | 2.35 | 3.03  | 0.002 | 0.036 |
| <i>NDFIPI</i>   | 242.25  | -1.81 | 0.60 | -3.03 | 0.002 | 0.037 |
| <i>ACSL3</i>    | 172.37  | -1.63 | 0.54 | -3.02 | 0.002 | 0.037 |
| <i>SOBP</i>     | 125.07  | -1.78 | 0.59 | -3.02 | 0.003 | 0.037 |
| <i>ARAP2</i>    | 244.94  | -2.23 | 0.74 | -3.02 | 0.003 | 0.037 |
| <i>DACT1</i>    | 72.73   | 1.92  | 0.64 | 3.02  | 0.003 | 0.037 |
| <i>BEND3</i>    | 51.57   | 2.46  | 0.81 | 3.02  | 0.003 | 0.037 |
| <i>CNP</i>      | 475.35  | -2.04 | 0.68 | -3.02 | 0.003 | 0.037 |
| <i>GFOD1</i>    | 305.78  | -1.52 | 0.50 | -3.02 | 0.003 | 0.037 |
| <i>LYNX1</i>    | 122.50  | -2.27 | 0.75 | -3.02 | 0.003 | 0.037 |
| <i>SLC38A10</i> | 352.94  | 1.76  | 0.58 | 3.02  | 0.003 | 0.037 |
| <i>CWF19L2</i>  | 143.38  | -1.55 | 0.51 | -3.01 | 0.003 | 0.037 |
| <i>PCK2</i>     | 67.65   | 2.44  | 0.81 | 3.01  | 0.003 | 0.037 |
| <i>EPM2A</i>    | 108.98  | 1.72  | 0.57 | 3.01  | 0.003 | 0.037 |
| <i>ITGB5</i>    | 317.03  | 1.71  | 0.57 | 3.01  | 0.003 | 0.038 |
| <i>PAIP2B</i>   | 110.40  | -2.07 | 0.69 | -3.01 | 0.003 | 0.038 |
| <i>NAGK</i>     | 278.08  | 1.54  | 0.51 | 3.01  | 0.003 | 0.038 |
| <i>CD300LF</i>  | 36.60   | 2.80  | 0.93 | 3.01  | 0.003 | 0.038 |
| <i>GSTM5</i>    | 56.98   | 2.72  | 0.91 | 3.00  | 0.003 | 0.039 |

|                 |          |       |      |       |       |       |
|-----------------|----------|-------|------|-------|-------|-------|
| <i>DENND5B</i>  | 120.01   | -1.60 | 0.53 | -3.00 | 0.003 | 0.039 |
| <i>MT-CYB</i>   | 14513.25 | 1.82  | 0.61 | 3.00  | 0.003 | 0.039 |
| <i>SLAMF6</i>   | 32.83    | 3.17  | 1.06 | 2.99  | 0.003 | 0.039 |
| <i>GMFG</i>     | 42.70    | 2.44  | 0.82 | 2.99  | 0.003 | 0.039 |
| <i>IVL</i>      | 135.85   | 5.84  | 1.95 | 2.99  | 0.003 | 0.040 |
| <i>GPR132</i>   | 74.83    | 2.49  | 0.83 | 2.98  | 0.003 | 0.040 |
| <i>LTBR</i>     | 216.19   | 1.42  | 0.48 | 2.98  | 0.003 | 0.040 |
| <i>COX5B</i>    | 112.51   | -1.68 | 0.56 | -2.98 | 0.003 | 0.040 |
| <i>PLB1</i>     | 92.06    | 2.46  | 0.83 | 2.98  | 0.003 | 0.041 |
| <i>MT-ND5</i>   | 33285.12 | 1.91  | 0.64 | 2.97  | 0.003 | 0.041 |
| <i>SGCD</i>     | 81.33    | 1.93  | 0.65 | 2.97  | 0.003 | 0.042 |
| <i>CD300A</i>   | 58.91    | 2.05  | 0.69 | 2.97  | 0.003 | 0.042 |
| <i>ZBTB18</i>   | 115.09   | -1.53 | 0.51 | -2.97 | 0.003 | 0.042 |
| <i>ARHGAP5</i>  | 334.32   | -1.50 | 0.50 | -2.97 | 0.003 | 0.042 |
| <i>CTSL</i>     | 283.09   | 1.89  | 0.64 | 2.96  | 0.003 | 0.042 |
| <i>LMO2</i>     | 139.94   | -1.96 | 0.66 | -2.96 | 0.003 | 0.042 |
| <i>SMG5</i>     | 229.33   | -1.25 | 0.42 | -2.96 | 0.003 | 0.043 |
| <i>NCAMI</i>    | 471.68   | -2.15 | 0.73 | -2.96 | 0.003 | 0.043 |
| <i>TCF7</i>     | 141.24   | 2.16  | 0.73 | 2.96  | 0.003 | 0.043 |
| <i>EFHD1</i>    | 134.67   | -2.34 | 0.79 | -2.95 | 0.003 | 0.043 |
| <i>PLEKHA7</i>  | 182.14   | 1.89  | 0.64 | 2.95  | 0.003 | 0.043 |
| <i>RNASEH2B</i> | 190.62   | 1.60  | 0.54 | 2.95  | 0.003 | 0.043 |
| <i>ACP6</i>     | 88.42    | 1.97  | 0.67 | 2.95  | 0.003 | 0.044 |
| <i>MOBP</i>     | 390.90   | -2.35 | 0.80 | -2.95 | 0.003 | 0.044 |
| <i>PRNP</i>     | 381.47   | -2.12 | 0.72 | -2.95 | 0.003 | 0.044 |
| <i>CHIT1</i>    | 75.95    | 2.97  | 1.01 | 2.95  | 0.003 | 0.044 |
| <i>PMM2</i>     | 106.86   | 1.72  | 0.58 | 2.94  | 0.003 | 0.044 |
| <i>PSD4</i>     | 208.17   | 1.85  | 0.63 | 2.94  | 0.003 | 0.044 |
| <i>ZFR</i>      | 286.00   | -1.83 | 0.62 | -2.94 | 0.003 | 0.044 |
| <i>ZNF16</i>    | 34.80    | 2.21  | 0.75 | 2.94  | 0.003 | 0.044 |
| <i>ELF4</i>     | 77.42    | 1.85  | 0.63 | 2.94  | 0.003 | 0.044 |
| <i>LOXL3</i>    | 89.13    | 1.94  | 0.66 | 2.94  | 0.003 | 0.044 |
| <i>COMP</i>     | 115.43   | 5.47  | 1.86 | 2.94  | 0.003 | 0.044 |
| <i>DSE</i>      | 233.56   | 1.48  | 0.50 | 2.94  | 0.003 | 0.044 |
| <i>ANKRD40</i>  | 246.03   | -1.53 | 0.52 | -2.94 | 0.003 | 0.044 |



|                |         |       |      |       |       |       |
|----------------|---------|-------|------|-------|-------|-------|
| <i>ADAM8</i>   | 87.82   | 2.47  | 0.84 | 2.94  | 0.003 | 0.045 |
| <i>DSC2</i>    | 62.91   | 2.32  | 0.79 | 2.94  | 0.003 | 0.045 |
| <i>MOAPI</i>   | 92.36   | -2.07 | 0.70 | -2.94 | 0.003 | 0.045 |
| <i>MAP1B</i>   | 3867.44 | -1.56 | 0.53 | -2.93 | 0.003 | 0.045 |
| <i>CCDC88A</i> | 565.82  | -1.28 | 0.44 | -2.93 | 0.003 | 0.045 |
| <i>CHST11</i>  | 167.62  | 1.33  | 0.45 | 2.93  | 0.003 | 0.045 |
| <i>SMARCA1</i> | 160.77  | -1.55 | 0.53 | -2.93 | 0.003 | 0.045 |
| <i>TMEM40</i>  | 32.93   | 4.02  | 1.38 | 2.93  | 0.003 | 0.046 |
| <i>DDB2</i>    | 95.97   | 1.79  | 0.61 | 2.92  | 0.003 | 0.046 |
| <i>GLI2</i>    | 76.40   | 2.79  | 0.95 | 2.92  | 0.003 | 0.046 |
| <i>NKG7</i>    | 25.80   | 2.82  | 0.97 | 2.92  | 0.003 | 0.046 |
| <i>SNAI2</i>   | 53.39   | 2.70  | 0.92 | 2.92  | 0.003 | 0.046 |
| <i>TAGAP</i>   | 61.20   | 2.41  | 0.82 | 2.92  | 0.003 | 0.046 |
| <i>CSF3R</i>   | 377.95  | 2.24  | 0.77 | 2.92  | 0.004 | 0.046 |
| <i>ISG20</i>   | 138.23  | 1.62  | 0.55 | 2.92  | 0.004 | 0.046 |
| <i>AMZI</i>    | 51.43   | 2.58  | 0.88 | 2.91  | 0.004 | 0.047 |
| <i>DTX2</i>    | 41.55   | 2.05  | 0.70 | 2.91  | 0.004 | 0.047 |
| <i>TPRGIL</i>  | 72.47   | -2.10 | 0.72 | -2.91 | 0.004 | 0.047 |
| <i>BTBD3</i>   | 119.45  | -1.80 | 0.62 | -2.91 | 0.004 | 0.047 |
| <i>PDGFRA</i>  | 145.70  | 2.01  | 0.69 | 2.91  | 0.004 | 0.047 |
| <i>EXOC2</i>   | 104.67  | -1.52 | 0.52 | -2.91 | 0.004 | 0.047 |
| <i>MAP7</i>    | 233.83  | -2.39 | 0.82 | -2.91 | 0.004 | 0.047 |
| <i>EVC</i>     | 223.96  | 1.77  | 0.61 | 2.91  | 0.004 | 0.047 |
| <i>ROCK2</i>   | 361.23  | -1.37 | 0.47 | -2.91 | 0.004 | 0.047 |
| <i>METTL22</i> | 122.64  | 1.47  | 0.50 | 2.91  | 0.004 | 0.047 |
| <i>CEP290</i>  | 184.94  | -1.37 | 0.47 | -2.90 | 0.004 | 0.048 |
| <i>GNAI5</i>   | 48.27   | 2.64  | 0.91 | 2.90  | 0.004 | 0.048 |
| <i>ROR1</i>    | 84.72   | 2.71  | 0.93 | 2.90  | 0.004 | 0.048 |
| <i>AIF1</i>    | 110.81  | 1.74  | 0.60 | 2.90  | 0.004 | 0.048 |
| <i>IL1R2</i>   | 112.32  | 3.28  | 1.13 | 2.90  | 0.004 | 0.048 |
| <i>CD300E</i>  | 142.94  | 2.58  | 0.89 | 2.90  | 0.004 | 0.048 |
| <i>CLN6</i>    | 60.25   | 1.80  | 0.62 | 2.90  | 0.004 | 0.048 |
| <i>MKL2</i>    | 732.03  | -1.86 | 0.64 | -2.90 | 0.004 | 0.048 |
| <i>C3AR1</i>   | 49.49   | 2.18  | 0.75 | 2.90  | 0.004 | 0.048 |
| <i>PLA1A</i>   | 138.06  | -1.73 | 0.60 | -2.90 | 0.004 | 0.048 |

|                |        |       |      |       |       |       |
|----------------|--------|-------|------|-------|-------|-------|
| <i>SCIMP</i>   | 52.42  | 2.34  | 0.81 | 2.89  | 0.004 | 0.048 |
| <i>APLNR</i>   | 156.72 | 1.85  | 0.64 | 2.89  | 0.004 | 0.048 |
| <i>IQSEC1</i>  | 624.87 | -1.07 | 0.37 | -2.89 | 0.004 | 0.049 |
| <i>LYZ</i>     | 193.48 | 2.54  | 0.88 | 2.89  | 0.004 | 0.049 |
| <i>ZNF845</i>  | 53.72  | 1.97  | 0.68 | 2.89  | 0.004 | 0.049 |
| <i>ZSCAN18</i> | 199.71 | -1.49 | 0.51 | -2.89 | 0.004 | 0.049 |
| <i>MAPK7</i>   | 121.20 | 1.56  | 0.54 | 2.89  | 0.004 | 0.049 |
| <i>XRCC5</i>   | 346.87 | -1.33 | 0.46 | -2.89 | 0.004 | 0.049 |
| <i>COL27A1</i> | 267.74 | 1.62  | 0.56 | 2.89  | 0.004 | 0.049 |
| <i>FAM217B</i> | 68.34  | -1.98 | 0.69 | -2.88 | 0.004 | 0.049 |
| <i>LOXHD1</i>  | 165.90 | 5.53  | 1.92 | 2.88  | 0.004 | 0.049 |
| <i>DHX58</i>   | 82.41  | 1.92  | 0.67 | 2.88  | 0.004 | 0.049 |
| <i>COL8A2</i>  | 71.35  | 2.85  | 0.99 | 2.88  | 0.004 | 0.049 |
| <i>PXDN</i>    | 295.13 | 2.15  | 0.75 | 2.88  | 0.004 | 0.050 |
| <i>EHHADH</i>  | 70.06  | 2.84  | 0.99 | 2.88  | 0.004 | 0.050 |
| <i>MYCL</i>    | 40.12  | 2.79  | 0.97 | 2.88  | 0.004 | 0.050 |
| <i>CREB3L4</i> | 51.24  | 2.83  | 0.98 | 2.88  | 0.004 | 0.050 |

---

**Supplemental Table 6** 237 DEGs identified in the non-CASH transcriptome

|                  | Mean   | Log2<br>(Fold Change) | LfcSE | Stat  | p-value | p-value<br>(FDR corrected) |
|------------------|--------|-----------------------|-------|-------|---------|----------------------------|
| <i>CXCL9</i>     | 49.84  | 6.42                  | 1.32  | 4.88  | 0.000   | 0.000                      |
| <i>ANXA1</i>     | 409.21 | 2.21                  | 0.49  | 4.53  | 0.000   | 0.001                      |
| <i>KIAA1549L</i> | 271.75 | -3.79                 | 0.89  | -4.24 | 0.000   | 0.002                      |
| <i>FMOD</i>      | 151.48 | 2.68                  | 0.65  | 4.11  | 0.000   | 0.002                      |
| <i>DHRS9</i>     | 21.61  | 4.04                  | 0.99  | 4.10  | 0.000   | 0.002                      |
| <i>SEMA3G</i>    | 152.89 | -4.15                 | 1.04  | -3.99 | 0.000   | 0.003                      |
| <i>UNC13A</i>    | 300.37 | -3.23                 | 0.83  | -3.87 | 0.000   | 0.005                      |
| <i>RGS4</i>      | 108.46 | -3.81                 | 0.99  | -3.87 | 0.000   | 0.005                      |
| <i>NRXN1</i>     | 283.18 | -3.72                 | 0.97  | -3.83 | 0.000   | 0.005                      |
| <i>HLA-DOA</i>   | 52.96  | 3.14                  | 0.83  | 3.78  | 0.000   | 0.006                      |
| <i>CELF4</i>     | 132.38 | -3.91                 | 1.04  | -3.77 | 0.000   | 0.006                      |
| <i>PTGIS</i>     | 124.81 | 2.25                  | 0.60  | 3.77  | 0.000   | 0.006                      |
| <i>GABRA2</i>    | 91.79  | -4.51                 | 1.21  | -3.74 | 0.000   | 0.007                      |
| <i>LRRC4B</i>    | 84.85  | -3.56                 | 0.95  | -3.74 | 0.000   | 0.007                      |
| <i>BRSK2</i>     | 126.66 | -2.89                 | 0.78  | -3.73 | 0.000   | 0.007                      |
| <i>ABR</i>       | 636.80 | -1.56                 | 0.42  | -3.72 | 0.000   | 0.007                      |
| <i>BASPI</i>     | 246.19 | -2.63                 | 0.71  | -3.69 | 0.000   | 0.008                      |
| <i>KCNS2</i>     | 48.06  | -4.87                 | 1.32  | -3.69 | 0.000   | 0.008                      |
| <i>TSPYL1</i>    | 292.40 | -2.01                 | 0.54  | -3.69 | 0.000   | 0.008                      |
| <i>GITI</i>      | 273.74 | -1.55                 | 0.42  | -3.68 | 0.000   | 0.008                      |
| <i>CLEC7A</i>    | 69.34  | 2.68                  | 0.73  | 3.67  | 0.000   | 0.008                      |
| <i>DLG4</i>      | 257.03 | -2.05                 | 0.56  | -3.67 | 0.000   | 0.008                      |
| <i>ALOX15B</i>   | 52.31  | 4.58                  | 1.25  | 3.67  | 0.000   | 0.008                      |
| <i>FPGT-</i>     |        |                       |       |       |         |                            |
| <i>TNNI3K</i>    | 41.49  | 3.65                  | 1.00  | 3.66  | 0.000   | 0.008                      |
| <i>EEF1A2</i>    | 293.70 | -3.21                 | 0.88  | -3.65 | 0.000   | 0.009                      |
| <i>TECTA</i>     | 55.75  | 2.94                  | 0.81  | 3.64  | 0.000   | 0.009                      |
| <i>CDKN2A</i>    | 36.41  | 3.68                  | 1.02  | 3.63  | 0.000   | 0.009                      |
| <i>GOLGA8A</i>   | 83.81  | -2.44                 | 0.67  | -3.62 | 0.000   | 0.010                      |
| <i>GALNT9</i>    | 88.96  | -6.61                 | 1.82  | -3.62 | 0.000   | 0.010                      |
| <i>MAST1</i>     | 125.07 | -3.89                 | 1.08  | -3.62 | 0.000   | 0.010                      |

|                 |        |       |      |       |       |       |
|-----------------|--------|-------|------|-------|-------|-------|
| <i>SLC1A7</i>   | 48.78  | -5.21 | 1.44 | -3.62 | 0.000 | 0.010 |
| <i>CHRNA2</i>   | 62.47  | -4.85 | 1.34 | -3.61 | 0.000 | 0.010 |
| <i>CELF5</i>    | 80.85  | -4.25 | 1.18 | -3.61 | 0.000 | 0.010 |
| <i>SEZ6</i>     | 54.91  | -5.00 | 1.39 | -3.59 | 0.000 | 0.010 |
| <i>CBLN2</i>    | 46.06  | -4.88 | 1.36 | -3.58 | 0.000 | 0.011 |
| <i>IL33</i>     | 36.36  | 2.84  | 0.80 | 3.56  | 0.000 | 0.011 |
| <i>SP7</i>      | 25.27  | 4.58  | 1.29 | 3.55  | 0.000 | 0.012 |
| <i>MDGA2</i>    | 60.09  | -4.74 | 1.33 | -3.55 | 0.000 | 0.012 |
| <i>CSAR2</i>    | 50.34  | 3.25  | 0.92 | 3.55  | 0.000 | 0.012 |
| <i>GRM7</i>     | 60.59  | -4.25 | 1.20 | -3.54 | 0.000 | 0.012 |
| <i>HIST1H1C</i> | 105.21 | -2.01 | 0.57 | -3.54 | 0.000 | 0.012 |
| <i>GLIPR1</i>   | 105.35 | 2.39  | 0.67 | 3.54  | 0.000 | 0.012 |
| <i>HIP1R</i>    | 274.16 | -2.23 | 0.63 | -3.53 | 0.000 | 0.012 |
| <i>SCN3A</i>    | 80.85  | -4.18 | 1.19 | -3.53 | 0.000 | 0.012 |
| <i>PRMT8</i>    | 59.27  | -4.81 | 1.37 | -3.52 | 0.000 | 0.013 |
| <i>TMEM86A</i>  | 60.79  | 2.26  | 0.64 | 3.51  | 0.000 | 0.013 |
| <i>CEP170B</i>  | 227.76 | -1.68 | 0.48 | -3.50 | 0.000 | 0.013 |
| <i>CELSR2</i>   | 302.49 | -2.12 | 0.60 | -3.50 | 0.000 | 0.013 |
| <i>FOLR2</i>    | 53.16  | 2.78  | 0.79 | 3.50  | 0.000 | 0.013 |
| <i>ARHGAP35</i> | 480.42 | -1.31 | 0.38 | -3.49 | 0.000 | 0.014 |
| <i>LRRTM2</i>   | 64.60  | -3.35 | 0.96 | -3.49 | 0.000 | 0.014 |
| <i>MGAT1</i>    | 478.05 | 1.12  | 0.32 | 3.48  | 0.001 | 0.014 |
| <i>DOCK8</i>    | 273.66 | 1.35  | 0.39 | 3.47  | 0.001 | 0.014 |
| <i>LYVE1</i>    | 69.11  | 3.78  | 1.09 | 3.47  | 0.001 | 0.014 |
| <i>AMER3</i>    | 78.23  | -6.42 | 1.86 | -3.46 | 0.001 | 0.015 |
| <i>EPHA5</i>    | 51.29  | -4.79 | 1.39 | -3.45 | 0.001 | 0.015 |
| <i>MTMR7</i>    | 54.54  | -4.13 | 1.20 | -3.46 | 0.001 | 0.015 |
| <i>CYTH4</i>    | 193.36 | 2.05  | 0.59 | 3.45  | 0.001 | 0.015 |
| <i>SLC40A1</i>  | 164.23 | 2.08  | 0.60 | 3.44  | 0.001 | 0.015 |
| <i>XK</i>       | 32.34  | -4.67 | 1.36 | -3.44 | 0.001 | 0.015 |
| <i>SYT16</i>    | 105.97 | -5.73 | 1.67 | -3.43 | 0.001 | 0.015 |
| <i>COL14A1</i>  | 345.95 | 1.81  | 0.53 | 3.43  | 0.001 | 0.016 |
| <i>CTSC</i>     | 146.42 | 1.82  | 0.53 | 3.43  | 0.001 | 0.016 |
| <i>FGF12</i>    | 87.45  | -3.89 | 1.14 | -3.43 | 0.001 | 0.016 |
| <i>OTOA</i>     | 33.86  | 4.26  | 1.24 | 3.42  | 0.001 | 0.016 |

|                 |         |       |      |       |       |       |
|-----------------|---------|-------|------|-------|-------|-------|
| <i>ZNF385B</i>  | 39.95   | -4.67 | 1.36 | -3.42 | 0.001 | 0.016 |
| <i>IGF2</i>     | 413.69  | 3.21  | 0.94 | 3.42  | 0.001 | 0.016 |
| <i>B3GALT2</i>  | 28.82   | -3.99 | 1.17 | -3.41 | 0.001 | 0.017 |
| <i>G6PC3</i>    | 91.87   | 1.97  | 0.58 | 3.41  | 0.001 | 0.017 |
| <i>FGF14</i>    | 84.94   | -6.82 | 2.01 | -3.40 | 0.001 | 0.017 |
| <i>SCN8A</i>    | 274.62  | -2.96 | 0.87 | -3.39 | 0.001 | 0.017 |
| <i>C4orf50</i>  | 140.29  | -3.70 | 1.09 | -3.39 | 0.001 | 0.017 |
| <i>EBF2</i>     | 47.50   | 3.54  | 1.04 | 3.39  | 0.001 | 0.017 |
| <i>KIF3C</i>    | 180.46  | -2.59 | 0.76 | -3.39 | 0.001 | 0.017 |
| <i>SV2B</i>     | 245.72  | -5.04 | 1.49 | -3.39 | 0.001 | 0.017 |
| <i>KIAA1755</i> | 405.57  | 2.24  | 0.66 | 3.38  | 0.001 | 0.017 |
| <i>DOCK3</i>    | 232.32  | -2.74 | 0.81 | -3.38 | 0.001 | 0.018 |
| <i>SLC8A1</i>   | 336.18  | -1.61 | 0.48 | -3.37 | 0.001 | 0.018 |
| <i>DIRAS1</i>   | 72.84   | -3.68 | 1.10 | -3.36 | 0.001 | 0.018 |
| <i>PAK3</i>     | 148.67  | -3.14 | 0.93 | -3.36 | 0.001 | 0.018 |
| <i>GAD1</i>     | 71.79   | -4.08 | 1.22 | -3.35 | 0.001 | 0.019 |
| <i>LY9</i>      | 62.69   | 4.30  | 1.28 | 3.35  | 0.001 | 0.019 |
| <i>GLRA3</i>    | 37.28   | -4.90 | 1.46 | -3.35 | 0.001 | 0.019 |
| <i>GPR17</i>    | 32.65   | -4.93 | 1.47 | -3.35 | 0.001 | 0.019 |
| <i>ITGAD</i>    | 40.58   | 4.26  | 1.27 | 3.35  | 0.001 | 0.019 |
| <i>GPRASP1</i>  | 266.02  | -1.58 | 0.47 | -3.34 | 0.001 | 0.019 |
| <i>PIANP</i>    | 39.28   | -3.46 | 1.03 | -3.34 | 0.001 | 0.019 |
| <i>ARHGEF7</i>  | 408.89  | -1.52 | 0.46 | -3.33 | 0.001 | 0.020 |
| <i>CHRM3</i>    | 115.32  | -6.23 | 1.87 | -3.34 | 0.001 | 0.020 |
| <i>TRHDE</i>    | 46.59   | -4.29 | 1.29 | -3.33 | 0.001 | 0.020 |
| <i>ADAMTS1</i>  | 1369.35 | -2.85 | 0.86 | -3.33 | 0.001 | 0.020 |
| <i>ELMOD1</i>   | 56.22   | -3.60 | 1.08 | -3.33 | 0.001 | 0.020 |
| <i>RNF157</i>   | 129.23  | -2.51 | 0.76 | -3.33 | 0.001 | 0.020 |
| <i>ADGRB1</i>   | 105.83  | -3.06 | 0.92 | -3.33 | 0.001 | 0.020 |
| <i>ERC2</i>     | 156.06  | -5.37 | 1.62 | -3.32 | 0.001 | 0.020 |
| <i>FAXC</i>     | 89.14   | -6.09 | 1.84 | -3.32 | 0.001 | 0.020 |
| <i>GJB6</i>     | 34.67   | -4.54 | 1.37 | -3.32 | 0.001 | 0.020 |
| <i>HLA-DMA</i>  | 89.72   | 2.18  | 0.66 | 3.32  | 0.001 | 0.020 |
| <i>PKP2</i>     | 56.05   | 2.71  | 0.82 | 3.31  | 0.001 | 0.020 |
| <i>CYTIP</i>    | 80.21   | 2.21  | 0.67 | 3.30  | 0.001 | 0.021 |

|                  |        |       |      |       |       |       |
|------------------|--------|-------|------|-------|-------|-------|
| <i>SYP</i>       | 175.24 | -3.12 | 0.95 | -3.30 | 0.001 | 0.021 |
| <i>SEZ6L2</i>    | 91.10  | -3.43 | 1.04 | -3.30 | 0.001 | 0.022 |
| <i>GPRIN1</i>    | 75.71  | -3.91 | 1.19 | -3.28 | 0.001 | 0.022 |
| <i>MAMDC2</i>    | 42.08  | 2.38  | 0.73 | 3.28  | 0.001 | 0.023 |
| <i>CYFIP2</i>    | 343.77 | -1.67 | 0.51 | -3.27 | 0.001 | 0.023 |
| <i>CCR7</i>      | 21.29  | 3.88  | 1.19 | 3.27  | 0.001 | 0.023 |
| <i>KIF21A</i>    | 172.31 | -2.18 | 0.67 | -3.27 | 0.001 | 0.023 |
| <i>PNMAL2</i>    | 129.89 | -2.62 | 0.80 | -3.27 | 0.001 | 0.023 |
| <i>CLSTN1</i>    | 761.86 | -1.80 | 0.55 | -3.26 | 0.001 | 0.023 |
| <i>RPGR</i>      | 225.23 | -1.72 | 0.53 | -3.26 | 0.001 | 0.024 |
| <i>CAMSAP3</i>   | 50.41  | -3.93 | 1.21 | -3.25 | 0.001 | 0.024 |
| <i>HNMT</i>      | 88.53  | 1.74  | 0.54 | 3.25  | 0.001 | 0.024 |
| <i>CA11</i>      | 109.43 | -2.34 | 0.72 | -3.25 | 0.001 | 0.024 |
| <i>INA</i>       | 101.63 | -5.36 | 1.65 | -3.24 | 0.001 | 0.024 |
| <i>PTPRT</i>     | 213.63 | -6.10 | 1.88 | -3.25 | 0.001 | 0.024 |
| <i>TNFRSF11A</i> | 75.55  | 1.87  | 0.58 | 3.24  | 0.001 | 0.024 |
| <i>CLIC6</i>     | 47.62  | 2.88  | 0.89 | 3.23  | 0.001 | 0.025 |
| <i>GPR160</i>    | 24.81  | 3.05  | 0.94 | 3.23  | 0.001 | 0.025 |
| <i>LONRF2</i>    | 216.95 | -2.63 | 0.81 | -3.23 | 0.001 | 0.025 |
| <i>CACNA1I</i>   | 117.42 | -2.97 | 0.92 | -3.22 | 0.001 | 0.026 |
| <i>CDH9</i>      | 32.86  | -4.58 | 1.42 | -3.22 | 0.001 | 0.026 |
| <i>PKIG</i>      | 112.95 | -1.71 | 0.53 | -3.22 | 0.001 | 0.026 |
| <i>CPNE6</i>     | 72.13  | -5.96 | 1.86 | -3.21 | 0.001 | 0.026 |
| <i>IFI30</i>     | 24.63  | 4.14  | 1.30 | 3.20  | 0.001 | 0.027 |
| <i>KLC2</i>      | 138.27 | -1.96 | 0.61 | -3.20 | 0.001 | 0.027 |
| <i>KIAA1211L</i> | 109.44 | -1.73 | 0.54 | -3.19 | 0.001 | 0.028 |
| <i>MTUS2</i>     | 115.40 | -3.25 | 1.02 | -3.19 | 0.001 | 0.028 |
| <i>LAMA4</i>     | 663.35 | 1.69  | 0.53 | 3.19  | 0.001 | 0.028 |
| <i>MADD</i>      | 329.36 | -1.61 | 0.50 | -3.19 | 0.001 | 0.028 |
| <i>SOX5</i>      | 115.39 | -2.40 | 0.75 | -3.19 | 0.001 | 0.028 |
| <i>ACTL6B</i>    | 25.50  | -4.94 | 1.55 | -3.19 | 0.001 | 0.028 |
| <i>COLEC12</i>   | 260.96 | 1.62  | 0.51 | 3.18  | 0.001 | 0.028 |
| <i>FRMD6</i>     | 131.35 | 1.70  | 0.54 | 3.18  | 0.001 | 0.028 |
| <i>SLC26A2</i>   | 103.82 | -2.10 | 0.66 | -3.18 | 0.001 | 0.028 |

|                 |        |       |      |       |       |       |
|-----------------|--------|-------|------|-------|-------|-------|
| <i>ADAM11</i>   | 68.75  | -3.04 | 0.96 | -3.18 | 0.001 | 0.028 |
| <i>INPP5F</i>   | 162.06 | -1.64 | 0.52 | -3.18 | 0.001 | 0.028 |
| <i>MMP16</i>    | 69.40  | -2.22 | 0.70 | -3.18 | 0.001 | 0.028 |
| <i>PCNX4</i>    | 266.94 | 1.12  | 0.35 | 3.18  | 0.001 | 0.028 |
| <i>APBB1</i>    | 168.89 | -1.76 | 0.55 | -3.17 | 0.002 | 0.029 |
| <i>FMO3</i>     | 35.97  | 3.34  | 1.05 | 3.17  | 0.002 | 0.029 |
| <i>EPB41L1</i>  | 385.72 | -1.46 | 0.46 | -3.17 | 0.002 | 0.029 |
| <i>CD53</i>     | 93.97  | 2.02  | 0.64 | 3.16  | 0.002 | 0.029 |
| <i>REPS2</i>    | 124.90 | -2.14 | 0.67 | -3.16 | 0.002 | 0.029 |
| <i>FMO2</i>     | 85.20  | 2.51  | 0.80 | 3.16  | 0.002 | 0.030 |
| <i>DOC2A</i>    | 59.63  | -3.17 | 1.00 | -3.15 | 0.002 | 0.030 |
| <i>PTPRD</i>    | 268.23 | -2.44 | 0.77 | -3.15 | 0.002 | 0.030 |
| <i>MAPK8IP1</i> | 111.31 | -2.11 | 0.67 | -3.15 | 0.002 | 0.030 |
| <i>KCNK12</i>   | 47.60  | -4.57 | 1.45 | -3.15 | 0.002 | 0.030 |
| <i>SSTR1</i>    | 35.66  | -4.90 | 1.56 | -3.15 | 0.002 | 0.031 |
| <i>DLL4</i>     | 78.71  | -2.71 | 0.86 | -3.14 | 0.002 | 0.031 |
| <i>LRRC7</i>    | 154.80 | -3.33 | 1.06 | -3.14 | 0.002 | 0.031 |
| <i>BHMT2</i>    | 84.19  | 2.33  | 0.74 | 3.14  | 0.002 | 0.031 |
| <i>SRRM4</i>    | 112.19 | -3.22 | 1.03 | -3.13 | 0.002 | 0.032 |
| <i>PICK1</i>    | 89.70  | -2.47 | 0.79 | -3.13 | 0.002 | 0.032 |
| <i>SLC25A23</i> | 147.57 | -1.64 | 0.52 | -3.13 | 0.002 | 0.032 |
| <i>FASN</i>     | 269.28 | -1.50 | 0.48 | -3.13 | 0.002 | 0.032 |
| <i>ARHGEF9</i>  | 231.47 | -1.64 | 0.52 | -3.13 | 0.002 | 0.032 |
| <i>ARHGAP25</i> | 148.33 | 1.67  | 0.53 | 3.13  | 0.002 | 0.032 |
| <i>LTBP4</i>    | 272.01 | 1.46  | 0.47 | 3.13  | 0.002 | 0.032 |
| <i>SIX1</i>     | 53.86  | 3.02  | 0.97 | 3.12  | 0.002 | 0.032 |
| <i>STK17A</i>   | 84.54  | 1.91  | 0.61 | 3.12  | 0.002 | 0.032 |
| <i>FAM46A</i>   | 97.63  | 2.24  | 0.72 | 3.12  | 0.002 | 0.032 |
| <i>CD38</i>     | 56.99  | 3.42  | 1.10 | 3.12  | 0.002 | 0.032 |
| <i>PNMAL1</i>   | 102.17 | -2.15 | 0.69 | -3.12 | 0.002 | 0.032 |
| <i>SPIRE2</i>   | 68.12  | -3.61 | 1.16 | -3.11 | 0.002 | 0.033 |
| <i>MPPED1</i>   | 62.31  | -4.15 | 1.34 | -3.10 | 0.002 | 0.034 |
| <i>NRSN1</i>    | 37.52  | -3.50 | 1.13 | -3.10 | 0.002 | 0.034 |
| <i>EMX1</i>     | 41.26  | -4.54 | 1.46 | -3.10 | 0.002 | 0.034 |
| <i>JCHAIN</i>   | 81.52  | 3.72  | 1.20 | 3.10  | 0.002 | 0.034 |

|                 |         |       |      |       |       |       |
|-----------------|---------|-------|------|-------|-------|-------|
| <i>ANKRD30B</i> | 32.69   | -4.65 | 1.50 | -3.10 | 0.002 | 0.034 |
| <i>GABRA1</i>   | 95.40   | -3.15 | 1.02 | -3.09 | 0.002 | 0.035 |
| <i>STMN4</i>    | 85.05   | -3.07 | 0.99 | -3.09 | 0.002 | 0.035 |
| <i>PLTP</i>     | 319.72  | 1.74  | 0.56 | 3.08  | 0.002 | 0.036 |
| <i>TLL7</i>     | 184.53  | -2.68 | 0.87 | -3.08 | 0.002 | 0.036 |
| <i>SLC24A2</i>  | 268.39  | -2.93 | 0.95 | -3.08 | 0.002 | 0.036 |
| <i>MYO5A</i>    | 540.87  | -1.47 | 0.48 | -3.08 | 0.002 | 0.036 |
| <i>WNT5A</i>    | 54.64   | 1.87  | 0.61 | 3.08  | 0.002 | 0.036 |
| <i>KCNB1</i>    | 277.62  | -2.61 | 0.85 | -3.07 | 0.002 | 0.036 |
| <i>DMP1</i>     | 49.92   | 3.84  | 1.25 | 3.07  | 0.002 | 0.036 |
| <i>OLFM3</i>    | 38.56   | -6.67 | 2.17 | -3.07 | 0.002 | 0.036 |
| <i>CADPS</i>    | 204.12  | -2.73 | 0.89 | -3.07 | 0.002 | 0.037 |
| <i>GRIK1</i>    | 51.93   | -4.20 | 1.38 | -3.06 | 0.002 | 0.038 |
| <i>LUC7L3</i>   | 1214.80 | -1.49 | 0.49 | -3.06 | 0.002 | 0.038 |
| <i>ELAVL3</i>   | 152.53  | -2.99 | 0.98 | -3.05 | 0.002 | 0.038 |
| <i>RHBDL3</i>   | 43.97   | -3.42 | 1.12 | -3.05 | 0.002 | 0.038 |
| <i>FBXO44</i>   | 64.56   | -1.98 | 0.65 | -3.05 | 0.002 | 0.039 |
| <i>LRRN2</i>    | 55.13   | -3.81 | 1.25 | -3.04 | 0.002 | 0.039 |
| <i>SPATA18</i>  | 53.98   | 3.12  | 1.03 | 3.04  | 0.002 | 0.040 |
| <i>DSCAM</i>    | 96.55   | -5.03 | 1.66 | -3.03 | 0.002 | 0.040 |
| <i>FUCA2</i>    | 54.94   | 2.44  | 0.81 | 3.03  | 0.002 | 0.040 |
| <i>CERCAM</i>   | 240.91  | -1.83 | 0.60 | -3.03 | 0.002 | 0.040 |
| <i>NELL2</i>    | 88.59   | -2.41 | 0.80 | -3.03 | 0.002 | 0.041 |
| <i>ROS1</i>     | 34.88   | -4.64 | 1.53 | -3.02 | 0.003 | 0.041 |
| <i>ELAVL4</i>   | 78.63   | -3.47 | 1.15 | -3.02 | 0.003 | 0.041 |
| <i>SH3GLB2</i>  | 193.59  | -1.35 | 0.45 | -3.02 | 0.003 | 0.041 |
| <i>SLITRK4</i>  | 49.50   | -3.79 | 1.25 | -3.02 | 0.003 | 0.041 |
| <i>TENM1</i>    | 75.73   | -5.64 | 1.87 | -3.02 | 0.003 | 0.042 |
| <i>CDCA7L</i>   | 50.96   | 2.03  | 0.67 | 3.02  | 0.003 | 0.042 |
| <i>ADGRG6</i>   | 488.49  | 2.00  | 0.66 | 3.01  | 0.003 | 0.042 |
| <i>TMEM145</i>  | 24.48   | -4.27 | 1.42 | -3.00 | 0.003 | 0.043 |
| <i>UNC5A</i>    | 83.55   | -3.78 | 1.26 | -3.00 | 0.003 | 0.043 |
| <i>SRPK2</i>    | 226.68  | -1.36 | 0.45 | -3.00 | 0.003 | 0.043 |
| <i>BRINP3</i>   | 38.18   | -3.87 | 1.30 | -2.99 | 0.003 | 0.044 |
| <i>NIPAL3</i>   | 162.55  | -1.59 | 0.53 | -2.99 | 0.003 | 0.044 |



|                |        |       |      |       |       |       |
|----------------|--------|-------|------|-------|-------|-------|
| <i>KCNN1</i>   | 43.21  | -3.75 | 1.26 | -2.99 | 0.003 | 0.044 |
| <i>COL4A4</i>  | 110.33 | 1.82  | 0.61 | 2.99  | 0.003 | 0.045 |
| <i>NEURL1</i>  | 50.91  | -3.77 | 1.26 | -2.98 | 0.003 | 0.045 |
| <i>UNC79</i>   | 138.95 | -3.13 | 1.05 | -2.99 | 0.003 | 0.045 |
| <i>SVOP</i>    | 76.70  | -3.70 | 1.24 | -2.98 | 0.003 | 0.045 |
| <i>DPF1</i>    | 52.85  | -3.38 | 1.14 | -2.98 | 0.003 | 0.045 |
| <i>ZNF267</i>  | 97.21  | 1.37  | 0.46 | 2.98  | 0.003 | 0.045 |
| <i>MYCBP2</i>  | 753.32 | -1.35 | 0.46 | -2.97 | 0.003 | 0.045 |
| <i>KCNA1</i>   | 64.58  | -5.87 | 1.97 | -2.97 | 0.003 | 0.045 |
| <i>BCAT1</i>   | 237.22 | 2.03  | 0.68 | 2.97  | 0.003 | 0.046 |
| <i>JAKMIP1</i> | 74.64  | -3.15 | 1.06 | -2.97 | 0.003 | 0.046 |
| <i>HK3</i>     | 78.29  | 2.06  | 0.70 | 2.96  | 0.003 | 0.047 |
| <i>PNCK</i>    | 48.15  | -3.17 | 1.07 | -2.96 | 0.003 | 0.047 |
| <i>KCNH5</i>   | 62.57  | -5.94 | 2.01 | -2.96 | 0.003 | 0.047 |
| <i>BMF</i>     | 76.69  | 2.15  | 0.73 | 2.96  | 0.003 | 0.048 |
| <i>FLRT1</i>   | 27.43  | -4.57 | 1.55 | -2.96 | 0.003 | 0.048 |
| <i>MAN2B1</i>  | 137.08 | 1.45  | 0.49 | 2.95  | 0.003 | 0.048 |
| <i>LHCGR</i>   | 34.95  | 2.56  | 0.87 | 2.95  | 0.003 | 0.048 |
| <i>SOWAHC</i>  | 38.02  | 2.98  | 1.01 | 2.95  | 0.003 | 0.048 |
| <i>SLC30A3</i> | 38.42  | -3.78 | 1.28 | -2.95 | 0.003 | 0.048 |
| <i>CTNNA2</i>  | 134.88 | -2.62 | 0.89 | -2.95 | 0.003 | 0.048 |
| <i>LMO4</i>    | 116.01 | -1.66 | 0.56 | -2.95 | 0.003 | 0.048 |
| <i>NRROS</i>   | 34.86  | 2.29  | 0.78 | 2.95  | 0.003 | 0.048 |
| <i>GRB10</i>   | 230.19 | -1.33 | 0.45 | -2.95 | 0.003 | 0.048 |
| <i>KATNB1</i>  | 94.76  | -1.80 | 0.61 | -2.95 | 0.003 | 0.049 |
| <i>WEE1</i>    | 51.71  | 2.41  | 0.82 | 2.94  | 0.003 | 0.049 |
| <i>SPHKAP</i>  | 63.99  | -5.58 | 1.90 | -2.94 | 0.003 | 0.049 |
| <i>PACSINI</i> | 202.10 | -4.91 | 1.67 | -2.94 | 0.003 | 0.049 |
| <i>LRFN5</i>   | 54.00  | -3.85 | 1.31 | -2.94 | 0.003 | 0.049 |
| <i>KBTBD11</i> | 116.45 | -2.01 | 0.68 | -2.93 | 0.003 | 0.050 |
| <i>PSRC1</i>   | 85.92  | -2.01 | 0.68 | -2.93 | 0.003 | 0.050 |
| <i>MAPK3</i>   | 170.25 | -1.64 | 0.56 | -2.93 | 0.003 | 0.050 |
| <i>LTB4R</i>   | 60.99  | 2.24  | 0.77 | 2.93  | 0.003 | 0.050 |

---

**Supplemental Table 7** *The 629 DEGs commonly identified in both the transcriptome of CASH and non-CASH*

|                 | CASH vs. Healthy Non-CA |                       |       |       |         |                            | Non-CASH vs. Healthy Non-CA |                       |       |       |         |                            |
|-----------------|-------------------------|-----------------------|-------|-------|---------|----------------------------|-----------------------------|-----------------------|-------|-------|---------|----------------------------|
|                 | Mean                    | Log2<br>(Fold Change) | LfcSE | Stat  | p-value | p-value<br>(FDR corrected) | Mean                        | Log2<br>(Fold Change) | LfcSE | Stat  | p-value | p-value<br>(FDR corrected) |
| <i>LTBP2</i>    | 717.01                  | 4.88                  | 0.51  | 9.48  | 0.000   | 0.000                      | 717.01                      | 4.53                  | 0.49  | 9.19  | 0.000   | 0.000                      |
| <i>MXRA5</i>    | 453.26                  | 4.73                  | 0.54  | 8.70  | 0.000   | 0.000                      | 453.26                      | 3.25                  | 0.52  | 6.22  | 0.000   | 0.000                      |
| <i>KIF5A</i>    | 885.91                  | -4.98                 | 0.66  | -7.50 | 0.000   | 0.000                      | 885.91                      | -4.87                 | 0.63  | -7.69 | 0.000   | 0.000                      |
| <i>SFRP4</i>    | 301.90                  | 5.96                  | 0.83  | 7.20  | 0.000   | 0.000                      | 301.90                      | 6.66                  | 0.79  | 8.42  | 0.000   | 0.000                      |
| <i>COL3A1</i>   | 3793.67                 | 6.31                  | 0.89  | 7.10  | 0.000   | 0.000                      | 3793.67                     | 5.14                  | 0.85  | 6.04  | 0.000   | 0.000                      |
| <i>CD163</i>    | 688.01                  | 3.94                  | 0.58  | 6.75  | 0.000   | 0.000                      | 688.01                      | 3.41                  | 0.56  | 6.10  | 0.000   | 0.000                      |
| <i>CCDC80</i>   | 668.75                  | 4.72                  | 0.71  | 6.65  | 0.000   | 0.000                      | 668.75                      | 3.68                  | 0.68  | 5.41  | 0.000   | 0.000                      |
| <i>CD4</i>      | 285.50                  | 2.58                  | 0.40  | 6.44  | 0.000   | 0.000                      | 285.50                      | 2.65                  | 0.38  | 6.92  | 0.000   | 0.000                      |
| <i>GRIN1</i>    | 369.05                  | -5.62                 | 0.88  | -6.42 | 0.000   | 0.000                      | 369.05                      | -5.05                 | 0.82  | -6.14 | 0.000   | 0.000                      |
| <i>STMN1</i>    | 277.98                  | -3.18                 | 0.49  | -6.43 | 0.000   | 0.000                      | 277.98                      | -2.66                 | 0.47  | -5.70 | 0.000   | 0.000                      |
| <i>ADAMTS12</i> | 123.66                  | 5.99                  | 0.94  | 6.37  | 0.000   | 0.000                      | 123.66                      | 5.53                  | 0.90  | 6.13  | 0.000   | 0.000                      |
| <i>ITGBL1</i>   | 162.14                  | 5.13                  | 0.81  | 6.34  | 0.000   | 0.000                      | 162.14                      | 5.39                  | 0.77  | 6.97  | 0.000   | 0.000                      |
| <i>KIF5C</i>    | 485.56                  | -3.89                 | 0.61  | -6.33 | 0.000   | 0.000                      | 485.56                      | -3.22                 | 0.58  | -5.53 | 0.000   | 0.000                      |
| <i>COL15A1</i>  | 303.51                  | 3.31                  | 0.53  | 6.20  | 0.000   | 0.000                      | 303.51                      | 2.12                  | 0.51  | 4.14  | 0.000   | 0.002                      |
| <i>CD163L1</i>  | 89.98                   | 3.41                  | 0.56  | 6.07  | 0.000   | 0.000                      | 89.98                       | 3.44                  | 0.54  | 6.43  | 0.000   | 0.000                      |
| <i>TGFBI</i>    | 478.46                  | 3.25                  | 0.54  | 6.06  | 0.000   | 0.000                      | 478.46                      | 2.88                  | 0.51  | 5.60  | 0.000   | 0.000                      |
| <i>COL6A3</i>   | 3836.51                 | 5.16                  | 0.88  | 5.90  | 0.000   | 0.000                      | 3836.51                     | 4.43                  | 0.84  | 5.28  | 0.000   | 0.000                      |
| <i>CAMK2A</i>   | 453.67                  | -5.58                 | 0.96  | -5.79 | 0.000   | 0.000                      | 453.67                      | -6.46                 | 0.92  | -7.04 | 0.000   | 0.000                      |
| <i>NRGN</i>     | 269.05                  | -4.20                 | 0.73  | -5.78 | 0.000   | 0.000                      | 269.05                      | -5.06                 | 0.71  | -7.16 | 0.000   | 0.000                      |

|                 |          |       |      |       |       |       |          |       |      |       |       |       |
|-----------------|----------|-------|------|-------|-------|-------|----------|-------|------|-------|-------|-------|
| <i>NCDN</i>     | 278.37   | -3.09 | 0.54 | -5.76 | 0.000 | 0.000 | 278.37   | -3.10 | 0.51 | -6.06 | 0.000 | 0.000 |
| <i>HLA-DQB2</i> | 39.75    | 6.65  | 1.16 | 5.71  | 0.000 | 0.000 | 39.75    | 5.78  | 1.12 | 5.15  | 0.000 | 0.000 |
| <i>COL1A2</i>   | 6387.34  | 4.95  | 0.87 | 5.70  | 0.000 | 0.000 | 6387.34  | 4.07  | 0.83 | 4.90  | 0.000 | 0.000 |
| <i>BNC2</i>     | 178.44   | 2.93  | 0.52 | 5.66  | 0.000 | 0.000 | 178.44   | 2.77  | 0.50 | 5.59  | 0.000 | 0.000 |
| <i>HLA-DRA</i>  | 577.90   | 3.15  | 0.56 | 5.61  | 0.000 | 0.000 | 577.90   | 2.79  | 0.54 | 5.19  | 0.000 | 0.000 |
| <i>COL1A1</i>   | 13348.85 | 6.59  | 1.18 | 5.59  | 0.000 | 0.000 | 13348.85 | 5.16  | 1.13 | 4.58  | 0.000 | 0.001 |
| <i>ITIH2</i>    | 151.46   | 4.46  | 0.80 | 5.60  | 0.000 | 0.000 | 151.46   | 4.74  | 0.76 | 6.22  | 0.000 | 0.000 |
| <i>EPN3</i>     | 109.27   | 3.70  | 0.67 | 5.56  | 0.000 | 0.000 | 109.27   | 2.56  | 0.64 | 3.99  | 0.000 | 0.003 |
| <i>SYTI</i>     | 442.56   | -4.95 | 0.89 | -5.55 | 0.000 | 0.000 | 442.56   | -5.68 | 0.85 | -6.67 | 0.000 | 0.000 |
| <i>ELOVL7</i>   | 186.39   | -3.17 | 0.57 | -5.54 | 0.000 | 0.000 | 186.39   | -2.09 | 0.54 | -3.89 | 0.000 | 0.004 |
| <i>PAPPA</i>    | 114.39   | 5.25  | 0.95 | 5.53  | 0.000 | 0.000 | 114.39   | 5.05  | 0.91 | 5.55  | 0.000 | 0.000 |
| <i>MAP2</i>     | 877.31   | -3.98 | 0.72 | -5.50 | 0.000 | 0.000 | 877.31   | -2.92 | 0.69 | -4.24 | 0.000 | 0.002 |
| <i>ATRNL1</i>   | 222.12   | -4.47 | 0.82 | -5.47 | 0.000 | 0.000 | 222.12   | -4.10 | 0.77 | -5.33 | 0.000 | 0.000 |
| <i>CKB</i>      | 163.46   | -4.90 | 0.90 | -5.45 | 0.000 | 0.000 | 163.46   | -3.78 | 0.84 | -4.48 | 0.000 | 0.001 |
| <i>CD28</i>     | 62.94    | 5.50  | 1.01 | 5.43  | 0.000 | 0.000 | 62.94    | 5.59  | 0.97 | 5.76  | 0.000 | 0.000 |
| <i>DOCK2</i>    | 310.75   | 1.90  | 0.35 | 5.43  | 0.000 | 0.000 | 310.75   | 1.52  | 0.33 | 4.55  | 0.000 | 0.001 |
| <i>MARCO</i>    | 118.37   | 5.34  | 0.99 | 5.42  | 0.000 | 0.000 | 118.37   | 5.03  | 0.94 | 5.34  | 0.000 | 0.000 |
| <i>SSC5D</i>    | 158.43   | 2.76  | 0.51 | 5.37  | 0.000 | 0.000 | 158.43   | 2.20  | 0.49 | 4.45  | 0.000 | 0.001 |
| <i>CMKLR1</i>   | 232.50   | 3.06  | 0.57 | 5.35  | 0.000 | 0.000 | 232.50   | 1.88  | 0.55 | 3.41  | 0.001 | 0.016 |
| <i>TNFSF15</i>  | 87.19    | 4.60  | 0.86 | 5.34  | 0.000 | 0.000 | 87.19    | 3.23  | 0.83 | 3.91  | 0.000 | 0.004 |
| <i>CAMK2N1</i>  | 229.45   | -2.89 | 0.54 | -5.33 | 0.000 | 0.000 | 229.45   | -2.41 | 0.51 | -4.68 | 0.000 | 0.000 |
| <i>ADAMTSL1</i> | 131.40   | 4.43  | 0.83 | 5.31  | 0.000 | 0.000 | 131.40   | 3.11  | 0.80 | 3.90  | 0.000 | 0.004 |
| <i>SYNE1</i>    | 2402.25  | -1.90 | 0.36 | -5.28 | 0.000 | 0.000 | 2402.25  | -1.18 | 0.34 | -3.44 | 0.001 | 0.015 |
| <i>EXOC6B</i>   | 292.35   | -2.16 | 0.41 | -5.26 | 0.000 | 0.000 | 292.35   | -1.54 | 0.39 | -3.97 | 0.000 | 0.004 |
| <i>MMP2</i>     | 282.45   | 3.73  | 0.71 | 5.26  | 0.000 | 0.000 | 282.45   | 2.66  | 0.68 | 3.91  | 0.000 | 0.004 |

|                 |         |       |      |       |       |       |         |       |      |       |       |       |
|-----------------|---------|-------|------|-------|-------|-------|---------|-------|------|-------|-------|-------|
| <i>SULF1</i>    | 550.82  | 4.02  | 0.76 | 5.25  | 0.000 | 0.000 | 550.82  | 3.15  | 0.73 | 4.30  | 0.000 | 0.001 |
| <i>KIF1B</i>    | 721.84  | -1.93 | 0.37 | -5.22 | 0.000 | 0.000 | 721.84  | -1.74 | 0.35 | -4.95 | 0.000 | 0.000 |
| <i>COL5A1</i>   | 1769.12 | 4.30  | 0.83 | 5.21  | 0.000 | 0.000 | 1769.12 | 3.05  | 0.79 | 3.86  | 0.000 | 0.005 |
| <i>WDFY4</i>    | 362.37  | 2.54  | 0.49 | 5.21  | 0.000 | 0.000 | 362.37  | 2.05  | 0.47 | 4.39  | 0.000 | 0.001 |
| <i>DUSP4</i>    | 66.07   | 3.55  | 0.68 | 5.19  | 0.000 | 0.000 | 66.07   | 2.20  | 0.66 | 3.34  | 0.001 | 0.019 |
| <i>ABCC3</i>    | 180.83  | 3.08  | 0.60 | 5.18  | 0.000 | 0.000 | 180.83  | 2.09  | 0.57 | 3.66  | 0.000 | 0.009 |
| <i>MRC1</i>     | 204.05  | 4.43  | 0.86 | 5.17  | 0.000 | 0.000 | 204.05  | 4.73  | 0.82 | 5.77  | 0.000 | 0.000 |
| <i>ABI3BP</i>   | 562.27  | 4.05  | 0.79 | 5.15  | 0.000 | 0.000 | 562.27  | 4.69  | 0.75 | 6.23  | 0.000 | 0.000 |
| <i>SPON2</i>    | 116.96  | 3.84  | 0.75 | 5.14  | 0.000 | 0.000 | 116.96  | 3.06  | 0.72 | 4.28  | 0.000 | 0.001 |
| <i>CLEC10A</i>  | 59.40   | 4.48  | 0.87 | 5.14  | 0.000 | 0.000 | 59.40   | 3.37  | 0.84 | 4.03  | 0.000 | 0.003 |
| <i>TSPAN18</i>  | 123.64  | 3.17  | 0.62 | 5.13  | 0.000 | 0.000 | 123.64  | 2.80  | 0.59 | 4.72  | 0.000 | 0.000 |
| <i>HLA-DQA1</i> | 117.53  | 3.81  | 0.74 | 5.11  | 0.000 | 0.000 | 117.53  | 3.77  | 0.71 | 5.30  | 0.000 | 0.000 |
| <i>STRA6</i>    | 96.46   | 4.71  | 0.92 | 5.12  | 0.000 | 0.000 | 96.46   | 4.46  | 0.88 | 5.05  | 0.000 | 0.000 |
| <i>PREPL</i>    | 226.28  | -2.80 | 0.55 | -5.11 | 0.000 | 0.000 | 226.28  | -2.20 | 0.52 | -4.25 | 0.000 | 0.001 |
| <i>MPEG1</i>    | 205.42  | 2.92  | 0.57 | 5.10  | 0.000 | 0.000 | 205.42  | 3.70  | 0.54 | 6.80  | 0.000 | 0.000 |
| <i>PSIP1</i>    | 249.40  | -2.06 | 0.41 | -5.08 | 0.000 | 0.000 | 249.40  | -1.86 | 0.39 | -4.82 | 0.000 | 0.000 |
| <i>CPXM2</i>    | 80.23   | 4.18  | 0.83 | 5.04  | 0.000 | 0.000 | 80.23   | 3.96  | 0.79 | 4.99  | 0.000 | 0.000 |
| <i>ZNF483</i>   | 187.78  | -2.65 | 0.52 | -5.04 | 0.000 | 0.000 | 187.78  | -2.40 | 0.50 | -4.82 | 0.000 | 0.000 |
| <i>ENPPI</i>    | 72.80   | 3.53  | 0.70 | 5.03  | 0.000 | 0.000 | 72.80   | 3.09  | 0.67 | 4.62  | 0.000 | 0.000 |
| <i>DMTN</i>     | 161.56  | -2.91 | 0.58 | -5.02 | 0.000 | 0.000 | 161.56  | -2.52 | 0.55 | -4.59 | 0.000 | 0.001 |
| <i>CD84</i>     | 191.69  | 2.40  | 0.48 | 4.98  | 0.000 | 0.000 | 191.69  | 2.88  | 0.46 | 6.28  | 0.000 | 0.000 |
| <i>FNDC1</i>    | 185.51  | 5.21  | 1.05 | 4.98  | 0.000 | 0.000 | 185.51  | 4.33  | 1.00 | 4.32  | 0.000 | 0.001 |
| <i>SYN1</i>     | 165.55  | -4.60 | 0.92 | -4.97 | 0.000 | 0.000 | 165.55  | -5.63 | 0.88 | -6.37 | 0.000 | 0.000 |
| <i>SYT11</i>    | 391.62  | -2.78 | 0.56 | -4.97 | 0.000 | 0.000 | 391.62  | -2.09 | 0.53 | -3.93 | 0.000 | 0.004 |
| <i>LRRC15</i>   | 87.79   | 5.01  | 1.01 | 4.96  | 0.000 | 0.000 | 87.79   | 4.22  | 0.97 | 4.36  | 0.000 | 0.001 |

|                |         |       |      |       |       |       |         |       |      |       |       |       |
|----------------|---------|-------|------|-------|-------|-------|---------|-------|------|-------|-------|-------|
| <i>TSC22D1</i> | 653.05  | -2.23 | 0.45 | -4.95 | 0.000 | 0.000 | 653.05  | -2.18 | 0.43 | -5.06 | 0.000 | 0.000 |
| <i>IGFN1</i>   | 141.01  | 4.42  | 0.89 | 4.95  | 0.000 | 0.000 | 141.01  | 3.24  | 0.86 | 3.79  | 0.000 | 0.006 |
| <i>RCAN2</i>   | 97.41   | -3.27 | 0.66 | -4.93 | 0.000 | 0.000 | 97.41   | -2.95 | 0.62 | -4.74 | 0.000 | 0.000 |
| <i>MAP1A</i>   | 1681.33 | -2.40 | 0.49 | -4.92 | 0.000 | 0.000 | 1681.33 | -2.43 | 0.47 | -5.22 | 0.000 | 0.000 |
| <i>SLC2A9</i>  | 73.56   | 3.63  | 0.74 | 4.91  | 0.000 | 0.000 | 73.56   | 3.04  | 0.71 | 4.29  | 0.000 | 0.001 |
| <i>CHITA</i>   | 417.12  | 2.00  | 0.41 | 4.90  | 0.000 | 0.000 | 417.12  | 1.80  | 0.39 | 4.62  | 0.000 | 0.000 |
| <i>GBP5</i>    | 113.65  | 3.39  | 0.69 | 4.90  | 0.000 | 0.000 | 113.65  | 2.72  | 0.66 | 4.11  | 0.000 | 0.002 |
| <i>STMN3</i>   | 119.75  | -3.10 | 0.63 | -4.91 | 0.000 | 0.000 | 119.75  | -2.72 | 0.60 | -4.57 | 0.000 | 0.001 |
| <i>ANK2</i>    | 886.56  | -2.39 | 0.49 | -4.89 | 0.000 | 0.000 | 886.56  | -2.57 | 0.47 | -5.49 | 0.000 | 0.000 |
| <i>ATP2B2</i>  | 299.46  | -4.46 | 0.91 | -4.88 | 0.000 | 0.000 | 299.46  | -4.37 | 0.87 | -5.04 | 0.000 | 0.000 |
| <i>PLAUR</i>   | 269.15  | 2.55  | 0.52 | 4.86  | 0.000 | 0.000 | 269.15  | 1.79  | 0.50 | 3.55  | 0.000 | 0.012 |
| <i>CARD11</i>  | 130.27  | 3.28  | 0.68 | 4.85  | 0.000 | 0.000 | 130.27  | 2.18  | 0.65 | 3.35  | 0.001 | 0.019 |
| <i>ADAMTS2</i> | 191.27  | 3.57  | 0.74 | 4.83  | 0.000 | 0.000 | 191.27  | 2.96  | 0.71 | 4.19  | 0.000 | 0.002 |
| <i>INHBA</i>   | 191.60  | 4.83  | 1.00 | 4.83  | 0.000 | 0.000 | 191.60  | 4.03  | 0.96 | 4.21  | 0.000 | 0.002 |
| <i>PIK3R5</i>  | 183.24  | 2.74  | 0.57 | 4.83  | 0.000 | 0.000 | 183.24  | 2.18  | 0.54 | 4.01  | 0.000 | 0.003 |
| <i>EPPK1</i>   | 77.09   | 4.20  | 0.87 | 4.82  | 0.000 | 0.000 | 77.09   | 3.46  | 0.84 | 4.15  | 0.000 | 0.002 |
| <i>SDCI</i>    | 51.45   | 4.83  | 1.00 | 4.82  | 0.000 | 0.000 | 51.45   | 3.55  | 0.96 | 3.69  | 0.000 | 0.008 |
| <i>LCK</i>     | 64.19   | 4.78  | 0.99 | 4.81  | 0.000 | 0.000 | 64.19   | 4.05  | 0.95 | 4.26  | 0.000 | 0.001 |
| <i>EFCAB4B</i> | 129.88  | 2.96  | 0.62 | 4.81  | 0.000 | 0.000 | 129.88  | 2.83  | 0.59 | 4.83  | 0.000 | 0.000 |
| <i>ATP8B4</i>  | 140.41  | 2.75  | 0.57 | 4.80  | 0.000 | 0.000 | 140.41  | 1.88  | 0.55 | 3.42  | 0.001 | 0.016 |
| <i>SPARCL1</i> | 2302.80 | -3.04 | 0.63 | -4.80 | 0.000 | 0.000 | 2302.80 | -2.62 | 0.61 | -4.32 | 0.000 | 0.001 |
| <i>ADAMTS5</i> | 65.06   | 4.60  | 0.96 | 4.79  | 0.000 | 0.000 | 65.06   | 3.81  | 0.92 | 4.14  | 0.000 | 0.002 |
| <i>NT5E</i>    | 106.48  | 2.65  | 0.55 | 4.79  | 0.000 | 0.000 | 106.48  | 2.45  | 0.53 | 4.63  | 0.000 | 0.000 |
| <i>NID2</i>    | 133.28  | 2.30  | 0.48 | 4.79  | 0.000 | 0.000 | 133.28  | 1.98  | 0.46 | 4.32  | 0.000 | 0.001 |
| <i>NBEA</i>    | 269.07  | -2.56 | 0.54 | -4.77 | 0.000 | 0.000 | 269.07  | -1.86 | 0.51 | -3.67 | 0.000 | 0.008 |

|                 |        |       |      |       |       |       |        |       |      |       |       |       |
|-----------------|--------|-------|------|-------|-------|-------|--------|-------|------|-------|-------|-------|
| <i>MS4A6A</i>   | 152.30 | 3.04  | 0.64 | 4.74  | 0.000 | 0.000 | 152.30 | 2.71  | 0.61 | 4.41  | 0.000 | 0.001 |
| <i>ARHGAP30</i> | 251.37 | 2.15  | 0.45 | 4.74  | 0.000 | 0.000 | 251.37 | 1.90  | 0.44 | 4.36  | 0.000 | 0.001 |
| <i>IL7R</i>     | 141.16 | 2.21  | 0.47 | 4.74  | 0.000 | 0.000 | 141.16 | 1.71  | 0.45 | 3.83  | 0.000 | 0.005 |
| <i>SIRPB1</i>   | 33.72  | 5.10  | 1.08 | 4.71  | 0.000 | 0.000 | 33.72  | 3.15  | 1.04 | 3.02  | 0.003 | 0.041 |
| <i>PLAU</i>     | 122.97 | 3.09  | 0.66 | 4.70  | 0.000 | 0.000 | 122.97 | 2.21  | 0.63 | 3.49  | 0.000 | 0.014 |
| <i>HLA-DPA1</i> | 426.59 | 2.40  | 0.51 | 4.69  | 0.000 | 0.000 | 426.59 | 2.93  | 0.49 | 5.99  | 0.000 | 0.000 |
| <i>KCNK6</i>    | 181.07 | 3.41  | 0.73 | 4.70  | 0.000 | 0.000 | 181.07 | 2.37  | 0.70 | 3.39  | 0.001 | 0.017 |
| <i>NCKAP1L</i>  | 238.67 | 2.15  | 0.46 | 4.69  | 0.000 | 0.000 | 238.67 | 1.71  | 0.44 | 3.89  | 0.000 | 0.004 |
| <i>ROR2</i>     | 77.03  | 3.53  | 0.75 | 4.70  | 0.000 | 0.000 | 77.03  | 2.59  | 0.72 | 3.59  | 0.000 | 0.010 |
| <i>SULT4A1</i>  | 86.02  | -5.85 | 1.25 | -4.69 | 0.000 | 0.000 | 86.02  | -6.13 | 1.15 | -5.31 | 0.000 | 0.000 |
| <i>GRAP2</i>    | 66.01  | 4.07  | 0.87 | 4.69  | 0.000 | 0.000 | 66.01  | 2.82  | 0.83 | 3.38  | 0.001 | 0.018 |
| <i>CRISPLD1</i> | 43.80  | 3.65  | 0.78 | 4.68  | 0.000 | 0.000 | 43.80  | 3.79  | 0.74 | 5.10  | 0.000 | 0.000 |
| <i>SFRP2</i>    | 50.93  | 4.17  | 0.89 | 4.68  | 0.000 | 0.000 | 50.93  | 3.68  | 0.85 | 4.31  | 0.000 | 0.001 |
| <i>CD6</i>      | 82.42  | 3.85  | 0.82 | 4.67  | 0.000 | 0.000 | 82.42  | 3.09  | 0.79 | 3.92  | 0.000 | 0.004 |
| <i>ISLR</i>     | 219.17 | 3.30  | 0.71 | 4.67  | 0.000 | 0.000 | 219.17 | 2.80  | 0.68 | 4.13  | 0.000 | 0.002 |
| <i>RIMS3</i>    | 173.32 | -3.57 | 0.76 | -4.67 | 0.000 | 0.000 | 173.32 | -3.21 | 0.72 | -4.44 | 0.000 | 0.001 |
| <i>ITGA11</i>   | 389.41 | 3.31  | 0.71 | 4.66  | 0.000 | 0.000 | 389.41 | 2.80  | 0.68 | 4.12  | 0.000 | 0.002 |
| <i>CIS</i>      | 603.67 | 1.76  | 0.38 | 4.63  | 0.000 | 0.000 | 603.67 | 2.20  | 0.36 | 6.06  | 0.000 | 0.000 |
| <i>TLL1</i>     | 78.09  | 2.71  | 0.59 | 4.62  | 0.000 | 0.000 | 78.09  | 1.69  | 0.57 | 2.99  | 0.003 | 0.044 |
| <i>ADAMTSL3</i> | 161.72 | 2.25  | 0.49 | 4.61  | 0.000 | 0.000 | 161.72 | 2.45  | 0.47 | 5.26  | 0.000 | 0.000 |
| <i>IL2RA</i>    | 60.03  | 4.64  | 1.01 | 4.60  | 0.000 | 0.000 | 60.03  | 3.60  | 0.97 | 3.72  | 0.000 | 0.007 |
| <i>SPINK5</i>   | 66.37  | 5.51  | 1.20 | 4.58  | 0.000 | 0.001 | 66.37  | 4.53  | 1.15 | 3.93  | 0.000 | 0.004 |
| <i>HLA-DPB1</i> | 465.98 | 3.13  | 0.68 | 4.58  | 0.000 | 0.001 | 465.98 | 3.04  | 0.65 | 4.65  | 0.000 | 0.000 |
| <i>DIRAS2</i>   | 91.48  | -5.47 | 1.20 | -4.58 | 0.000 | 0.001 | 91.48  | -6.11 | 1.11 | -5.49 | 0.000 | 0.000 |
| <i>LZTS3</i>    | 167.41 | -2.99 | 0.65 | -4.57 | 0.000 | 0.001 | 167.41 | -2.67 | 0.62 | -4.31 | 0.000 | 0.001 |

|                |          |       |      |       |       |       |          |       |      |       |       |       |
|----------------|----------|-------|------|-------|-------|-------|----------|-------|------|-------|-------|-------|
| <i>SLC1A2</i>  | 800.06   | -3.53 | 0.77 | -4.57 | 0.000 | 0.001 | 800.06   | -3.41 | 0.74 | -4.62 | 0.000 | 0.000 |
| <i>VAV3</i>    | 75.98    | 3.31  | 0.72 | 4.57  | 0.000 | 0.001 | 75.98    | 2.99  | 0.69 | 4.32  | 0.000 | 0.001 |
| <i>THBS2</i>   | 791.51   | 3.51  | 0.77 | 4.57  | 0.000 | 0.001 | 791.51   | 2.66  | 0.74 | 3.61  | 0.000 | 0.010 |
| <i>GPNMB</i>   | 472.99   | 3.89  | 0.85 | 4.56  | 0.000 | 0.001 | 472.99   | 4.05  | 0.82 | 4.97  | 0.000 | 0.000 |
| <i>ADAM19</i>  | 197.10   | 3.10  | 0.68 | 4.55  | 0.000 | 0.001 | 197.10   | 2.09  | 0.65 | 3.20  | 0.001 | 0.027 |
| <i>ADAM12</i>  | 167.58   | 3.83  | 0.84 | 4.55  | 0.000 | 0.001 | 167.58   | 2.94  | 0.81 | 3.65  | 0.000 | 0.009 |
| <i>FBLN2</i>   | 315.72   | 2.26  | 0.50 | 4.55  | 0.000 | 0.001 | 315.72   | 1.59  | 0.48 | 3.33  | 0.001 | 0.020 |
| <i>PTPN7</i>   | 81.60    | 3.35  | 0.74 | 4.55  | 0.000 | 0.001 | 81.60    | 2.53  | 0.71 | 3.58  | 0.000 | 0.011 |
| <i>RAB6B</i>   | 179.02   | -3.02 | 0.67 | -4.53 | 0.000 | 0.001 | 179.02   | -3.02 | 0.63 | -4.77 | 0.000 | 0.000 |
| <i>SCARA5</i>  | 47.57    | 4.49  | 0.99 | 4.53  | 0.000 | 0.001 | 47.57    | 3.89  | 0.95 | 4.09  | 0.000 | 0.002 |
| <i>TCHHL1</i>  | 84.58    | 5.90  | 1.30 | 4.54  | 0.000 | 0.001 | 84.58    | 4.71  | 1.25 | 3.78  | 0.000 | 0.006 |
| <i>ITGB2</i>   | 438.34   | 2.15  | 0.47 | 4.53  | 0.000 | 0.001 | 438.34   | 1.80  | 0.45 | 3.95  | 0.000 | 0.004 |
| <i>HMCN1</i>   | 196.90   | 3.01  | 0.67 | 4.52  | 0.000 | 0.001 | 196.90   | 2.86  | 0.64 | 4.50  | 0.000 | 0.001 |
| <i>STXBP1</i>  | 503.20   | -2.47 | 0.55 | -4.51 | 0.000 | 0.001 | 503.20   | -2.50 | 0.52 | -4.79 | 0.000 | 0.000 |
| <i>PCDH9</i>   | 596.86   | -2.85 | 0.63 | -4.51 | 0.000 | 0.001 | 596.86   | -3.18 | 0.61 | -5.26 | 0.000 | 0.000 |
| <i>AGTPBP1</i> | 126.80   | -2.53 | 0.56 | -4.50 | 0.000 | 0.001 | 126.80   | -1.91 | 0.53 | -3.62 | 0.000 | 0.010 |
| <i>MASPI</i>   | 139.47   | 4.35  | 0.97 | 4.50  | 0.000 | 0.001 | 139.47   | 4.23  | 0.93 | 4.57  | 0.000 | 0.001 |
| <i>IRX3</i>    | 43.46    | 4.57  | 1.02 | 4.50  | 0.000 | 0.001 | 43.46    | 4.21  | 0.98 | 4.31  | 0.000 | 0.001 |
| <i>KCNN4</i>   | 32.72    | 4.03  | 0.90 | 4.49  | 0.000 | 0.001 | 32.72    | 2.91  | 0.86 | 3.37  | 0.001 | 0.018 |
| <i>TNFSF8</i>  | 59.18    | 3.56  | 0.79 | 4.48  | 0.000 | 0.001 | 59.18    | 3.74  | 0.76 | 4.95  | 0.000 | 0.000 |
| <i>FNI</i>     | 14212.72 | 2.84  | 0.63 | 4.47  | 0.000 | 0.001 | 14212.72 | 1.96  | 0.61 | 3.23  | 0.001 | 0.025 |
| <i>FCGR2B</i>  | 71.64    | 3.28  | 0.73 | 4.47  | 0.000 | 0.001 | 71.64    | 3.06  | 0.70 | 4.37  | 0.000 | 0.001 |
| <i>NFASC</i>   | 797.35   | -1.81 | 0.41 | -4.47 | 0.000 | 0.001 | 797.35   | -1.71 | 0.39 | -4.41 | 0.000 | 0.001 |
| <i>ITPR1</i>   | 511.93   | -2.15 | 0.48 | -4.47 | 0.000 | 0.001 | 511.93   | -1.73 | 0.46 | -3.77 | 0.000 | 0.006 |
| <i>STC2</i>    | 65.77    | 5.07  | 1.14 | 4.46  | 0.000 | 0.001 | 65.77    | 4.92  | 1.09 | 4.52  | 0.000 | 0.001 |

|                 |         |       |      |       |       |       |         |       |      |       |       |       |
|-----------------|---------|-------|------|-------|-------|-------|---------|-------|------|-------|-------|-------|
| <i>CCR5</i>     | 72.87   | 2.50  | 0.56 | 4.46  | 0.000 | 0.001 | 72.87   | 2.21  | 0.53 | 4.14  | 0.000 | 0.002 |
| <i>ARFGEF3</i>  | 345.69  | -1.78 | 0.40 | -4.45 | 0.000 | 0.001 | 345.69  | -1.61 | 0.38 | -4.24 | 0.000 | 0.002 |
| <i>KIAA0513</i> | 288.06  | -2.06 | 0.46 | -4.45 | 0.000 | 0.001 | 288.06  | -2.13 | 0.44 | -4.83 | 0.000 | 0.000 |
| <i>FAP</i>      | 69.82   | 3.70  | 0.83 | 4.45  | 0.000 | 0.001 | 69.82   | 3.41  | 0.80 | 4.28  | 0.000 | 0.001 |
| <i>CLEC11A</i>  | 94.31   | 3.17  | 0.71 | 4.45  | 0.000 | 0.001 | 94.31   | 2.14  | 0.69 | 3.11  | 0.002 | 0.033 |
| <i>DENND1C</i>  | 81.07   | 3.20  | 0.72 | 4.44  | 0.000 | 0.001 | 81.07   | 2.57  | 0.69 | 3.72  | 0.000 | 0.007 |
| <i>CHN1</i>     | 206.06  | -3.38 | 0.77 | -4.42 | 0.000 | 0.001 | 206.06  | -2.73 | 0.73 | -3.76 | 0.000 | 0.006 |
| <i>SDR42E1</i>  | 62.56   | 4.84  | 1.10 | 4.42  | 0.000 | 0.001 | 62.56   | 5.01  | 1.05 | 4.75  | 0.000 | 0.000 |
| <i>STX1B</i>    | 170.81  | -3.55 | 0.80 | -4.42 | 0.000 | 0.001 | 170.81  | -3.63 | 0.77 | -4.73 | 0.000 | 0.000 |
| <i>ABCA2</i>    | 729.96  | -2.61 | 0.59 | -4.41 | 0.000 | 0.001 | 729.96  | -2.18 | 0.57 | -3.85 | 0.000 | 0.005 |
| <i>CD36</i>     | 60.69   | 4.30  | 0.98 | 4.41  | 0.000 | 0.001 | 60.69   | 3.36  | 0.93 | 3.60  | 0.000 | 0.010 |
| <i>FGD2</i>     | 207.09  | 2.33  | 0.53 | 4.41  | 0.000 | 0.001 | 207.09  | 2.06  | 0.51 | 4.08  | 0.000 | 0.003 |
| <i>TMOD2</i>    | 358.07  | -2.49 | 0.57 | -4.40 | 0.000 | 0.001 | 358.07  | -2.16 | 0.54 | -4.01 | 0.000 | 0.003 |
| <i>BIN1</i>     | 380.72  | -2.14 | 0.49 | -4.40 | 0.000 | 0.001 | 380.72  | -1.83 | 0.46 | -3.94 | 0.000 | 0.004 |
| <i>PCOLCE</i>   | 122.21  | 2.50  | 0.57 | 4.39  | 0.000 | 0.001 | 122.21  | 1.94  | 0.55 | 3.55  | 0.000 | 0.012 |
| <i>NNMT</i>     | 132.44  | 2.84  | 0.65 | 4.39  | 0.000 | 0.001 | 132.44  | 2.58  | 0.62 | 4.15  | 0.000 | 0.002 |
| <i>CTGF</i>     | 1099.48 | 3.08  | 0.70 | 4.38  | 0.000 | 0.001 | 1099.48 | 3.11  | 0.67 | 4.63  | 0.000 | 0.000 |
| <i>IBSP</i>     | 38.83   | 6.02  | 1.38 | 4.37  | 0.000 | 0.001 | 38.83   | 5.37  | 1.32 | 4.07  | 0.000 | 0.003 |
| <i>CES1</i>     | 45.89   | 2.95  | 0.68 | 4.37  | 0.000 | 0.001 | 45.89   | 2.21  | 0.65 | 3.41  | 0.001 | 0.016 |
| <i>IL15</i>     | 52.30   | 3.48  | 0.80 | 4.36  | 0.000 | 0.001 | 52.30   | 2.45  | 0.77 | 3.19  | 0.001 | 0.028 |
| <i>EFEMP1</i>   | 1068.87 | 2.86  | 0.66 | 4.35  | 0.000 | 0.001 | 1068.87 | 2.73  | 0.63 | 4.33  | 0.000 | 0.001 |
| <i>MYCBPAP</i>  | 122.37  | 2.41  | 0.56 | 4.34  | 0.000 | 0.001 | 122.37  | 2.32  | 0.53 | 4.39  | 0.000 | 0.001 |
| <i>COL6A2</i>   | 1972.90 | 2.98  | 0.69 | 4.34  | 0.000 | 0.001 | 1972.90 | 2.54  | 0.66 | 3.86  | 0.000 | 0.005 |
| <i>GALNT5</i>   | 35.59   | 4.86  | 1.12 | 4.34  | 0.000 | 0.001 | 35.59   | 3.76  | 1.08 | 3.49  | 0.000 | 0.014 |
| <i>PHYHIP</i>   | 179.60  | -4.65 | 1.07 | -4.33 | 0.000 | 0.001 | 179.60  | -5.37 | 1.02 | -5.24 | 0.000 | 0.000 |



|                |         |       |      |       |       |       |         |       |      |       |       |       |
|----------------|---------|-------|------|-------|-------|-------|---------|-------|------|-------|-------|-------|
| <i>PKD1L1</i>  | 103.76  | 3.04  | 0.70 | 4.33  | 0.000 | 0.001 | 103.76  | 2.56  | 0.67 | 3.80  | 0.000 | 0.006 |
| <i>SELP</i>    | 155.27  | 3.80  | 0.88 | 4.32  | 0.000 | 0.001 | 155.27  | 4.28  | 0.84 | 5.11  | 0.000 | 0.000 |
| <i>OSBPL1A</i> | 193.50  | -1.98 | 0.46 | -4.32 | 0.000 | 0.001 | 193.50  | -1.52 | 0.43 | -3.51 | 0.000 | 0.013 |
| <i>AMICA1</i>  | 162.46  | 3.28  | 0.76 | 4.31  | 0.000 | 0.001 | 162.46  | 2.47  | 0.73 | 3.40  | 0.001 | 0.017 |
| <i>LUM</i>     | 183.71  | 3.94  | 0.91 | 4.31  | 0.000 | 0.001 | 183.71  | 3.89  | 0.87 | 4.45  | 0.000 | 0.001 |
| <i>NAPB</i>    | 151.79  | -3.26 | 0.76 | -4.31 | 0.000 | 0.001 | 151.79  | -3.20 | 0.72 | -4.45 | 0.000 | 0.001 |
| <i>OLFML3</i>  | 165.70  | 2.31  | 0.54 | 4.30  | 0.000 | 0.001 | 165.70  | 2.39  | 0.51 | 4.65  | 0.000 | 0.000 |
| <i>CD33</i>    | 86.01   | 3.15  | 0.73 | 4.30  | 0.000 | 0.001 | 86.01   | 3.71  | 0.70 | 5.31  | 0.000 | 0.000 |
| <i>FBN2</i>    | 81.53   | 3.57  | 0.83 | 4.29  | 0.000 | 0.001 | 81.53   | 3.11  | 0.79 | 3.92  | 0.000 | 0.004 |
| <i>ALPK2</i>   | 84.52   | 4.77  | 1.11 | 4.28  | 0.000 | 0.001 | 84.52   | 3.42  | 1.07 | 3.20  | 0.001 | 0.027 |
| <i>BSN</i>     | 458.07  | -3.65 | 0.85 | -4.28 | 0.000 | 0.001 | 458.07  | -4.32 | 0.82 | -5.30 | 0.000 | 0.000 |
| <i>ANTXR1</i>  | 576.72  | 2.06  | 0.48 | 4.26  | 0.000 | 0.001 | 576.72  | 1.36  | 0.46 | 2.94  | 0.003 | 0.049 |
| <i>RDH10</i>   | 203.08  | 2.63  | 0.62 | 4.26  | 0.000 | 0.001 | 203.08  | 2.70  | 0.59 | 4.57  | 0.000 | 0.001 |
| <i>ANO9</i>    | 58.63   | 4.34  | 1.02 | 4.25  | 0.000 | 0.001 | 58.63   | 2.97  | 0.98 | 3.02  | 0.003 | 0.041 |
| <i>CD209</i>   | 50.82   | 4.13  | 0.97 | 4.25  | 0.000 | 0.001 | 50.82   | 4.29  | 0.93 | 4.61  | 0.000 | 0.000 |
| <i>EPAS1</i>   | 1968.34 | -2.14 | 0.51 | -4.24 | 0.000 | 0.001 | 1968.34 | -1.70 | 0.48 | -3.53 | 0.000 | 0.012 |
| <i>SLAMF7</i>  | 59.17   | 3.16  | 0.75 | 4.24  | 0.000 | 0.001 | 59.17   | 2.55  | 0.72 | 3.56  | 0.000 | 0.011 |
| <i>UCHL1</i>   | 174.78  | -3.44 | 0.81 | -4.23 | 0.000 | 0.001 | 174.78  | -3.04 | 0.77 | -3.94 | 0.000 | 0.004 |
| <i>GAS7</i>    | 489.65  | -1.80 | 0.43 | -4.23 | 0.000 | 0.002 | 489.65  | -1.71 | 0.41 | -4.21 | 0.000 | 0.002 |
| <i>SEL1L3</i>  | 187.19  | 1.89  | 0.45 | 4.23  | 0.000 | 0.002 | 187.19  | 2.28  | 0.42 | 5.36  | 0.000 | 0.000 |
| <i>CLEC5A</i>  | 83.67   | 4.66  | 1.10 | 4.22  | 0.000 | 0.002 | 83.67   | 4.56  | 1.06 | 4.32  | 0.000 | 0.001 |
| <i>CLDN15</i>  | 55.66   | 3.17  | 0.75 | 4.21  | 0.000 | 0.002 | 55.66   | 2.42  | 0.73 | 3.33  | 0.001 | 0.020 |
| <i>CYP2S1</i>  | 51.86   | 4.92  | 1.17 | 4.21  | 0.000 | 0.002 | 51.86   | 3.43  | 1.12 | 3.06  | 0.002 | 0.038 |
| <i>SIGLEC7</i> | 31.45   | 4.85  | 1.15 | 4.21  | 0.000 | 0.002 | 31.45   | 4.54  | 1.10 | 4.11  | 0.000 | 0.002 |
| <i>CPXMI</i>   | 56.29   | 4.58  | 1.09 | 4.20  | 0.000 | 0.002 | 56.29   | 3.59  | 1.05 | 3.43  | 0.001 | 0.015 |

|                 |        |       |      |       |       |       |        |       |      |       |       |       |
|-----------------|--------|-------|------|-------|-------|-------|--------|-------|------|-------|-------|-------|
| <i>SBSN</i>     | 79.60  | 5.77  | 1.37 | 4.20  | 0.000 | 0.002 | 79.60  | 5.00  | 1.32 | 3.80  | 0.000 | 0.006 |
| <i>TREMI</i>    | 51.90  | 5.09  | 1.21 | 4.20  | 0.000 | 0.002 | 51.90  | 4.13  | 1.16 | 3.55  | 0.000 | 0.012 |
| <i>PPP3CA</i>   | 274.17 | -2.35 | 0.56 | -4.19 | 0.000 | 0.002 | 274.17 | -2.10 | 0.53 | -3.94 | 0.000 | 0.004 |
| <i>OLFM1</i>    | 238.78 | -3.12 | 0.74 | -4.19 | 0.000 | 0.002 | 238.78 | -3.29 | 0.71 | -4.63 | 0.000 | 0.000 |
| <i>LOXL4</i>    | 44.24  | 5.84  | 1.40 | 4.18  | 0.000 | 0.002 | 44.24  | 5.36  | 1.35 | 3.98  | 0.000 | 0.003 |
| <i>SEPT3</i>    | 216.38 | -3.06 | 0.73 | -4.18 | 0.000 | 0.002 | 216.38 | -2.91 | 0.70 | -4.18 | 0.000 | 0.002 |
| <i>IQGAP2</i>   | 190.44 | 2.53  | 0.61 | 4.18  | 0.000 | 0.002 | 190.44 | 2.49  | 0.58 | 4.29  | 0.000 | 0.001 |
| <i>LOXL1</i>    | 97.71  | 3.59  | 0.86 | 4.17  | 0.000 | 0.002 | 97.71  | 3.01  | 0.82 | 3.65  | 0.000 | 0.009 |
| <i>CPLX2</i>    | 274.55 | -6.75 | 1.62 | -4.16 | 0.000 | 0.002 | 274.55 | -7.05 | 1.53 | -4.61 | 0.000 | 0.000 |
| <i>SLC16A1</i>  | 158.67 | -2.38 | 0.57 | -4.16 | 0.000 | 0.002 | 158.67 | -3.01 | 0.55 | -5.50 | 0.000 | 0.000 |
| <i>CALY</i>     | 39.42  | -6.14 | 1.48 | -4.16 | 0.000 | 0.002 | 39.42  | -6.02 | 1.37 | -4.40 | 0.000 | 0.001 |
| <i>FBXL16</i>   | 220.58 | -4.42 | 1.06 | -4.16 | 0.000 | 0.002 | 220.58 | -4.33 | 1.01 | -4.28 | 0.000 | 0.001 |
| <i>SLC12A2</i>  | 247.14 | -2.02 | 0.49 | -4.16 | 0.000 | 0.002 | 247.14 | -2.00 | 0.46 | -4.32 | 0.000 | 0.001 |
| <i>RAI14</i>    | 364.69 | 2.10  | 0.51 | 4.15  | 0.000 | 0.002 | 364.69 | 2.14  | 0.48 | 4.43  | 0.000 | 0.001 |
| <i>SERPINE1</i> | 479.68 | 3.31  | 0.80 | 4.15  | 0.000 | 0.002 | 479.68 | 2.74  | 0.76 | 3.59  | 0.000 | 0.010 |
| <i>LAMC3</i>    | 276.20 | 2.13  | 0.51 | 4.15  | 0.000 | 0.002 | 276.20 | 2.37  | 0.49 | 4.82  | 0.000 | 0.000 |
| <i>TFCP2L1</i>  | 51.88  | 3.81  | 0.92 | 4.14  | 0.000 | 0.002 | 51.88  | 3.38  | 0.88 | 3.85  | 0.000 | 0.005 |
| <i>HK2</i>      | 88.29  | 2.62  | 0.63 | 4.14  | 0.000 | 0.002 | 88.29  | 2.22  | 0.61 | 3.67  | 0.000 | 0.008 |
| <i>ZNF469</i>   | 292.78 | 2.57  | 0.62 | 4.14  | 0.000 | 0.002 | 292.78 | 1.88  | 0.59 | 3.17  | 0.002 | 0.029 |
| <i>FPR3</i>     | 60.48  | 4.30  | 1.04 | 4.14  | 0.000 | 0.002 | 60.48  | 4.83  | 0.99 | 4.86  | 0.000 | 0.000 |
| <i>ANKS1B</i>   | 168.96 | -4.28 | 1.04 | -4.13 | 0.000 | 0.002 | 168.96 | -4.33 | 0.97 | -4.45 | 0.000 | 0.001 |
| <i>EPS8L1</i>   | 79.99  | 4.98  | 1.20 | 4.13  | 0.000 | 0.002 | 79.99  | 3.40  | 1.16 | 2.94  | 0.003 | 0.049 |
| <i>SLC1A3</i>   | 567.50 | -1.83 | 0.44 | -4.13 | 0.000 | 0.002 | 567.50 | -1.35 | 0.42 | -3.19 | 0.001 | 0.028 |
| <i>PLEKHA4</i>  | 250.71 | 2.37  | 0.57 | 4.13  | 0.000 | 0.002 | 250.71 | 1.90  | 0.55 | 3.46  | 0.001 | 0.015 |
| <i>SH3GL3</i>   | 49.85  | -3.92 | 0.95 | -4.13 | 0.000 | 0.002 | 49.85  | -3.82 | 0.88 | -4.36 | 0.000 | 0.001 |

|                |        |       |      |       |       |       |        |       |      |       |       |       |
|----------------|--------|-------|------|-------|-------|-------|--------|-------|------|-------|-------|-------|
| <i>CELSR1</i>  | 154.18 | 4.47  | 1.08 | 4.12  | 0.000 | 0.002 | 154.18 | 3.87  | 1.04 | 3.73  | 0.000 | 0.007 |
| <i>FOXMI</i>   | 51.57  | 3.40  | 0.82 | 4.12  | 0.000 | 0.002 | 51.57  | 2.57  | 0.79 | 3.26  | 0.001 | 0.024 |
| <i>PRKAR1B</i> | 173.40 | -3.00 | 0.73 | -4.12 | 0.000 | 0.002 | 173.40 | -3.53 | 0.70 | -5.05 | 0.000 | 0.000 |
| <i>IKZF1</i>   | 167.85 | 2.03  | 0.49 | 4.11  | 0.000 | 0.002 | 167.85 | 1.98  | 0.47 | 4.18  | 0.000 | 0.002 |
| <i>MMP14</i>   | 470.31 | 2.72  | 0.66 | 4.11  | 0.000 | 0.002 | 470.31 | 1.97  | 0.63 | 3.11  | 0.002 | 0.033 |
| <i>ARNT2</i>   | 351.90 | -2.28 | 0.55 | -4.11 | 0.000 | 0.002 | 351.90 | -1.84 | 0.53 | -3.49 | 0.000 | 0.013 |
| <i>MDFI</i>    | 59.56  | 2.75  | 0.67 | 4.11  | 0.000 | 0.002 | 59.56  | 1.94  | 0.64 | 3.01  | 0.003 | 0.042 |
| <i>MGAT3</i>   | 109.88 | -2.16 | 0.53 | -4.10 | 0.000 | 0.002 | 109.88 | -1.75 | 0.49 | -3.53 | 0.000 | 0.012 |
| <i>TFAP2A</i>  | 70.37  | 4.36  | 1.07 | 4.09  | 0.000 | 0.002 | 70.37  | 4.47  | 1.02 | 4.38  | 0.000 | 0.001 |
| <i>YWHAH</i>   | 461.50 | -2.54 | 0.62 | -4.09 | 0.000 | 0.002 | 461.50 | -2.03 | 0.59 | -3.43 | 0.001 | 0.016 |
| <i>NFAMI</i>   | 109.57 | 2.91  | 0.71 | 4.09  | 0.000 | 0.002 | 109.57 | 2.04  | 0.68 | 2.98  | 0.003 | 0.045 |
| <i>MAN1A2</i>  | 481.04 | -2.06 | 0.50 | -4.08 | 0.000 | 0.002 | 481.04 | -1.64 | 0.48 | -3.41 | 0.001 | 0.017 |
| <i>RCN1</i>    | 76.37  | 2.11  | 0.52 | 4.08  | 0.000 | 0.002 | 76.37  | 2.63  | 0.49 | 5.37  | 0.000 | 0.000 |
| <i>PTK2</i>    | 562.88 | -1.64 | 0.40 | -4.08 | 0.000 | 0.002 | 562.88 | -1.49 | 0.38 | -3.89 | 0.000 | 0.004 |
| <i>NABPI</i>   | 299.48 | 2.23  | 0.55 | 4.08  | 0.000 | 0.002 | 299.48 | 2.05  | 0.52 | 3.92  | 0.000 | 0.004 |
| <i>PLCB4</i>   | 190.39 | -2.51 | 0.62 | -4.06 | 0.000 | 0.002 | 190.39 | -1.99 | 0.58 | -3.41 | 0.001 | 0.017 |
| <i>KCNC2</i>   | 63.71  | -5.17 | 1.27 | -4.06 | 0.000 | 0.002 | 63.71  | -6.31 | 1.20 | -5.26 | 0.000 | 0.000 |
| <i>TIMP1</i>   | 716.95 | 2.16  | 0.53 | 4.06  | 0.000 | 0.002 | 716.95 | 1.65  | 0.51 | 3.24  | 0.001 | 0.024 |
| <i>GPX8</i>    | 39.34  | 3.40  | 0.84 | 4.06  | 0.000 | 0.002 | 39.34  | 2.80  | 0.80 | 3.49  | 0.000 | 0.014 |
| <i>CD274</i>   | 46.09  | 4.18  | 1.03 | 4.05  | 0.000 | 0.002 | 46.09  | 3.06  | 0.99 | 3.09  | 0.002 | 0.035 |
| <i>ANTXR2</i>  | 198.33 | 2.13  | 0.53 | 4.04  | 0.000 | 0.003 | 198.33 | 1.81  | 0.50 | 3.59  | 0.000 | 0.010 |
| <i>ATCAY</i>   | 137.43 | -4.50 | 1.11 | -4.04 | 0.000 | 0.003 | 137.43 | -6.44 | 1.08 | -5.97 | 0.000 | 0.000 |
| <i>RAB3A</i>   | 78.12  | -3.63 | 0.90 | -4.03 | 0.000 | 0.003 | 78.12  | -3.18 | 0.85 | -3.75 | 0.000 | 0.007 |
| <i>DAB2</i>    | 405.24 | 2.21  | 0.55 | 4.02  | 0.000 | 0.003 | 405.24 | 2.66  | 0.53 | 5.06  | 0.000 | 0.000 |
| <i>TPRG1</i>   | 77.02  | 3.59  | 0.90 | 4.00  | 0.000 | 0.003 | 77.02  | 4.19  | 0.86 | 4.90  | 0.000 | 0.000 |

|                |         |       |      |       |       |       |         |       |      |       |       |       |
|----------------|---------|-------|------|-------|-------|-------|---------|-------|------|-------|-------|-------|
| <i>ZAP70</i>   | 59.64   | 2.83  | 0.71 | 3.99  | 0.000 | 0.003 | 59.64   | 2.35  | 0.68 | 3.48  | 0.001 | 0.014 |
| <i>FAM117A</i> | 88.90   | 2.96  | 0.74 | 3.99  | 0.000 | 0.003 | 88.90   | 2.31  | 0.71 | 3.26  | 0.001 | 0.024 |
| <i>PRR36</i>   | 56.14   | -6.22 | 1.56 | -3.98 | 0.000 | 0.003 | 56.14   | -7.46 | 1.48 | -5.03 | 0.000 | 0.000 |
| <i>STX1A</i>   | 89.57   | -3.50 | 0.88 | -3.98 | 0.000 | 0.003 | 89.57   | -4.06 | 0.84 | -4.86 | 0.000 | 0.000 |
| <i>OSR1</i>    | 48.15   | 3.62  | 0.91 | 3.98  | 0.000 | 0.003 | 48.15   | 3.00  | 0.87 | 3.45  | 0.001 | 0.015 |
| <i>NECAB1</i>  | 101.00  | -4.09 | 1.03 | -3.98 | 0.000 | 0.003 | 101.00  | -4.37 | 0.97 | -4.51 | 0.000 | 0.001 |
| <i>PSD3</i>    | 407.91  | -2.01 | 0.51 | -3.96 | 0.000 | 0.003 | 407.91  | -1.59 | 0.48 | -3.28 | 0.001 | 0.022 |
| <i>FCRL3</i>   | 53.02   | 4.31  | 1.09 | 3.95  | 0.000 | 0.004 | 53.02   | 4.46  | 1.04 | 4.27  | 0.000 | 0.001 |
| <i>WISP1</i>   | 41.25   | 4.12  | 1.04 | 3.95  | 0.000 | 0.004 | 41.25   | 3.90  | 1.00 | 3.91  | 0.000 | 0.004 |
| <i>F2R</i>     | 98.31   | 3.54  | 0.90 | 3.94  | 0.000 | 0.004 | 98.31   | 3.68  | 0.86 | 4.28  | 0.000 | 0.001 |
| <i>KLHL6</i>   | 127.99  | 2.41  | 0.61 | 3.94  | 0.000 | 0.004 | 127.99  | 1.83  | 0.59 | 3.12  | 0.002 | 0.032 |
| <i>CD52</i>    | 56.22   | 3.43  | 0.87 | 3.94  | 0.000 | 0.004 | 56.22   | 2.72  | 0.84 | 3.24  | 0.001 | 0.025 |
| <i>CD5</i>     | 43.62   | 4.21  | 1.07 | 3.93  | 0.000 | 0.004 | 43.62   | 5.01  | 1.02 | 4.91  | 0.000 | 0.000 |
| <i>LOX</i>     | 63.35   | 3.64  | 0.92 | 3.93  | 0.000 | 0.004 | 63.35   | 2.85  | 0.89 | 3.21  | 0.001 | 0.026 |
| <i>MKI67</i>   | 246.61  | 2.95  | 0.75 | 3.93  | 0.000 | 0.004 | 246.61  | 2.28  | 0.72 | 3.18  | 0.001 | 0.028 |
| <i>BICC1</i>   | 97.31   | 2.20  | 0.56 | 3.93  | 0.000 | 0.004 | 97.31   | 2.18  | 0.53 | 4.07  | 0.000 | 0.003 |
| <i>TREML2</i>  | 41.26   | 4.19  | 1.07 | 3.93  | 0.000 | 0.004 | 41.26   | 4.21  | 1.02 | 4.14  | 0.000 | 0.002 |
| <i>HMOX1</i>   | 308.83  | 2.75  | 0.70 | 3.92  | 0.000 | 0.004 | 308.83  | 2.82  | 0.67 | 4.19  | 0.000 | 0.002 |
| <i>SNCB</i>    | 89.61   | -4.22 | 1.08 | -3.91 | 0.000 | 0.004 | 89.61   | -4.23 | 1.02 | -4.15 | 0.000 | 0.002 |
| <i>CALM1</i>   | 1131.82 | -2.40 | 0.61 | -3.91 | 0.000 | 0.004 | 1131.82 | -2.09 | 0.59 | -3.55 | 0.000 | 0.012 |
| <i>FHL2</i>    | 206.23  | 2.28  | 0.58 | 3.91  | 0.000 | 0.004 | 206.23  | 2.88  | 0.56 | 5.19  | 0.000 | 0.000 |
| <i>SAMD3</i>   | 43.77   | 4.49  | 1.15 | 3.91  | 0.000 | 0.004 | 43.77   | 4.16  | 1.10 | 3.78  | 0.000 | 0.006 |
| <i>COLEC11</i> | 35.13   | 4.20  | 1.07 | 3.91  | 0.000 | 0.004 | 35.13   | 3.48  | 1.03 | 3.38  | 0.001 | 0.018 |
| <i>IRF8</i>    | 135.16  | 3.19  | 0.82 | 3.91  | 0.000 | 0.004 | 135.16  | 2.56  | 0.78 | 3.27  | 0.001 | 0.023 |
| <i>SLC37A2</i> | 84.83   | 2.76  | 0.71 | 3.91  | 0.000 | 0.004 | 84.83   | 2.15  | 0.68 | 3.17  | 0.002 | 0.029 |

|                |         |       |      |       |       |       |         |       |      |       |       |       |
|----------------|---------|-------|------|-------|-------|-------|---------|-------|------|-------|-------|-------|
| <i>MYTIL</i>   | 217.51  | -8.00 | 2.05 | -3.90 | 0.000 | 0.004 | 217.51  | -8.56 | 1.93 | -4.44 | 0.000 | 0.001 |
| <i>IGFBP2</i>  | 221.24  | 2.03  | 0.52 | 3.90  | 0.000 | 0.004 | 221.24  | 2.24  | 0.50 | 4.50  | 0.000 | 0.001 |
| <i>COL8A1</i>  | 307.26  | 2.57  | 0.66 | 3.89  | 0.000 | 0.004 | 307.26  | 2.39  | 0.63 | 3.79  | 0.000 | 0.006 |
| <i>PDLIM4</i>  | 74.64   | 2.40  | 0.62 | 3.89  | 0.000 | 0.004 | 74.64   | 2.12  | 0.59 | 3.60  | 0.000 | 0.010 |
| <i>EXOC3L2</i> | 40.17   | 5.03  | 1.29 | 3.89  | 0.000 | 0.004 | 40.17   | 4.58  | 1.24 | 3.69  | 0.000 | 0.008 |
| <i>TFEC</i>    | 68.86   | 2.80  | 0.72 | 3.88  | 0.000 | 0.004 | 68.86   | 2.92  | 0.69 | 4.24  | 0.000 | 0.002 |
| <i>MAPRE2</i>  | 266.16  | -1.84 | 0.47 | -3.88 | 0.000 | 0.004 | 266.16  | -1.42 | 0.45 | -3.15 | 0.002 | 0.030 |
| <i>CR1</i>     | 70.33   | 2.47  | 0.64 | 3.88  | 0.000 | 0.004 | 70.33   | 2.09  | 0.61 | 3.44  | 0.001 | 0.015 |
| <i>DLGAP1</i>  | 204.53  | -3.69 | 0.95 | -3.88 | 0.000 | 0.004 | 204.53  | -3.99 | 0.90 | -4.41 | 0.000 | 0.001 |
| <i>DNMI</i>    | 367.44  | -2.66 | 0.69 | -3.88 | 0.000 | 0.004 | 367.44  | -3.29 | 0.66 | -5.00 | 0.000 | 0.000 |
| <i>DST</i>     | 3361.41 | -1.59 | 0.41 | -3.88 | 0.000 | 0.004 | 3361.41 | -1.20 | 0.39 | -3.07 | 0.002 | 0.036 |
| <i>FBLN1</i>   | 395.04  | 2.13  | 0.55 | 3.87  | 0.000 | 0.004 | 395.04  | 1.82  | 0.53 | 3.45  | 0.001 | 0.015 |
| <i>AKT3</i>    | 422.18  | -2.10 | 0.54 | -3.87 | 0.000 | 0.004 | 422.18  | -1.75 | 0.52 | -3.39 | 0.001 | 0.017 |
| <i>DLGAP3</i>  | 76.36   | -5.25 | 1.36 | -3.86 | 0.000 | 0.005 | 76.36   | -5.78 | 1.27 | -4.53 | 0.000 | 0.001 |
| <i>RTN3</i>    | 296.10  | -2.09 | 0.54 | -3.86 | 0.000 | 0.005 | 296.10  | -1.84 | 0.52 | -3.57 | 0.000 | 0.011 |
| <i>C5AR1</i>   | 70.01   | 3.31  | 0.86 | 3.85  | 0.000 | 0.005 | 70.01   | 3.90  | 0.82 | 4.76  | 0.000 | 0.000 |
| <i>ASPM</i>    | 47.40   | 3.35  | 0.87 | 3.84  | 0.000 | 0.005 | 47.40   | 3.23  | 0.83 | 3.89  | 0.000 | 0.004 |
| <i>SRPX2</i>   | 161.39  | 2.47  | 0.64 | 3.84  | 0.000 | 0.005 | 161.39  | 1.89  | 0.62 | 3.08  | 0.002 | 0.036 |
| <i>STEAP3</i>  | 102.71  | 2.55  | 0.66 | 3.84  | 0.000 | 0.005 | 102.71  | 2.34  | 0.63 | 3.69  | 0.000 | 0.008 |
| <i>CD96</i>    | 47.44   | 3.79  | 0.99 | 3.83  | 0.000 | 0.005 | 47.44   | 3.37  | 0.95 | 3.56  | 0.000 | 0.011 |
| <i>SAMD11</i>  | 66.10   | 3.63  | 0.95 | 3.83  | 0.000 | 0.005 | 66.10   | 2.87  | 0.91 | 3.16  | 0.002 | 0.029 |
| <i>C3orf36</i> | 35.01   | 4.59  | 1.20 | 3.82  | 0.000 | 0.005 | 35.01   | 3.42  | 1.15 | 2.96  | 0.003 | 0.047 |
| <i>CELF3</i>   | 52.30   | -5.86 | 1.53 | -3.82 | 0.000 | 0.005 | 52.30   | -6.32 | 1.42 | -4.44 | 0.000 | 0.001 |
| <i>TPO</i>     | 111.18  | 3.29  | 0.86 | 3.82  | 0.000 | 0.005 | 111.18  | 3.59  | 0.82 | 4.37  | 0.000 | 0.001 |
| <i>TSPYL4</i>  | 145.52  | -1.87 | 0.49 | -3.82 | 0.000 | 0.005 | 145.52  | -2.20 | 0.47 | -4.67 | 0.000 | 0.000 |

|                 |        |       |      |       |       |       |        |       |      |       |       |       |
|-----------------|--------|-------|------|-------|-------|-------|--------|-------|------|-------|-------|-------|
| <i>CCR2</i>     | 42.15  | 4.51  | 1.18 | 3.82  | 0.000 | 0.005 | 42.15  | 4.48  | 1.13 | 3.96  | 0.000 | 0.004 |
| <i>PROCA1</i>   | 65.44  | 2.92  | 0.76 | 3.82  | 0.000 | 0.005 | 65.44  | 2.86  | 0.73 | 3.91  | 0.000 | 0.004 |
| <i>ADCY1</i>    | 240.83 | -2.82 | 0.74 | -3.81 | 0.000 | 0.005 | 240.83 | -2.97 | 0.70 | -4.22 | 0.000 | 0.002 |
| <i>ADGRL1</i>   | 240.64 | -1.95 | 0.51 | -3.81 | 0.000 | 0.005 | 240.64 | -1.61 | 0.49 | -3.31 | 0.001 | 0.021 |
| <i>KIF3A</i>    | 158.97 | -2.45 | 0.64 | -3.80 | 0.000 | 0.005 | 158.97 | -1.98 | 0.61 | -3.24 | 0.001 | 0.024 |
| <i>RUNX1</i>    | 321.30 | 1.84  | 0.49 | 3.79  | 0.000 | 0.005 | 321.30 | 1.78  | 0.46 | 3.82  | 0.000 | 0.005 |
| <i>C16orf54</i> | 38.49  | 4.06  | 1.07 | 3.79  | 0.000 | 0.006 | 38.49  | 3.15  | 1.03 | 3.07  | 0.002 | 0.036 |
| <i>SCN2A</i>    | 257.46 | -3.50 | 0.92 | -3.79 | 0.000 | 0.006 | 257.46 | -3.80 | 0.88 | -4.32 | 0.000 | 0.001 |
| <i>CASP8</i>    | 92.89  | 2.67  | 0.71 | 3.79  | 0.000 | 0.006 | 92.89  | 2.63  | 0.67 | 3.91  | 0.000 | 0.004 |
| <i>CALM3</i>    | 781.77 | -2.06 | 0.54 | -3.79 | 0.000 | 0.006 | 781.77 | -1.95 | 0.52 | -3.75 | 0.000 | 0.007 |
| <i>GYPC</i>     | 175.22 | 2.46  | 0.65 | 3.78  | 0.000 | 0.006 | 175.22 | 1.94  | 0.62 | 3.12  | 0.002 | 0.032 |
| <i>SH2D2A</i>   | 37.63  | 3.15  | 0.83 | 3.78  | 0.000 | 0.006 | 37.63  | 2.89  | 0.79 | 3.64  | 0.000 | 0.009 |
| <i>SERPINI1</i> | 72.96  | -4.52 | 1.20 | -3.78 | 0.000 | 0.006 | 72.96  | -4.55 | 1.11 | -4.12 | 0.000 | 0.002 |
| <i>NUGGC</i>    | 38.99  | 3.71  | 0.98 | 3.77  | 0.000 | 0.006 | 38.99  | 2.77  | 0.94 | 2.94  | 0.003 | 0.049 |
| <i>NCSI</i>     | 163.71 | -2.44 | 0.65 | -3.77 | 0.000 | 0.006 | 163.71 | -3.55 | 0.63 | -5.65 | 0.000 | 0.000 |
| <i>PI4KA</i>    | 424.09 | -1.82 | 0.48 | -3.77 | 0.000 | 0.006 | 424.09 | -1.74 | 0.46 | -3.78 | 0.000 | 0.006 |
| <i>PPP1R16B</i> | 238.88 | -1.68 | 0.45 | -3.77 | 0.000 | 0.006 | 238.88 | -2.17 | 0.43 | -5.07 | 0.000 | 0.000 |
| <i>IKZF3</i>    | 118.30 | 2.75  | 0.73 | 3.76  | 0.000 | 0.006 | 118.30 | 2.87  | 0.70 | 4.11  | 0.000 | 0.002 |
| <i>ATP2B1</i>   | 258.73 | -2.41 | 0.64 | -3.76 | 0.000 | 0.006 | 258.73 | -1.91 | 0.61 | -3.13 | 0.002 | 0.032 |
| <i>INMT</i>     | 87.88  | 3.39  | 0.90 | 3.76  | 0.000 | 0.006 | 87.88  | 3.39  | 0.86 | 3.94  | 0.000 | 0.004 |
| <i>MAP7D2</i>   | 67.57  | -4.69 | 1.25 | -3.75 | 0.000 | 0.006 | 67.57  | -6.22 | 1.21 | -5.16 | 0.000 | 0.000 |
| <i>ATP8A1</i>   | 222.91 | -2.10 | 0.56 | -3.75 | 0.000 | 0.006 | 222.91 | -2.02 | 0.53 | -3.78 | 0.000 | 0.006 |
| <i>WBSCR17</i>  | 62.69  | -4.95 | 1.32 | -3.75 | 0.000 | 0.006 | 62.69  | -5.75 | 1.23 | -4.66 | 0.000 | 0.000 |
| <i>CACNA1B</i>  | 141.08 | -3.66 | 0.98 | -3.75 | 0.000 | 0.006 | 141.08 | -3.48 | 0.92 | -3.79 | 0.000 | 0.006 |
| <i>OLFML2B</i>  | 225.28 | 2.05  | 0.55 | 3.75  | 0.000 | 0.006 | 225.28 | 2.38  | 0.52 | 4.56  | 0.000 | 0.001 |

|                |        |       |      |       |       |       |        |       |      |       |       |       |
|----------------|--------|-------|------|-------|-------|-------|--------|-------|------|-------|-------|-------|
| <i>R3HDM1</i>  | 283.70 | -2.20 | 0.59 | -3.74 | 0.000 | 0.006 | 283.70 | -2.38 | 0.56 | -4.22 | 0.000 | 0.002 |
| <i>SYT4</i>    | 61.24  | -5.42 | 1.45 | -3.73 | 0.000 | 0.006 | 61.24  | -6.32 | 1.36 | -4.65 | 0.000 | 0.000 |
| <i>CHD5</i>    | 288.59 | -3.73 | 1.00 | -3.73 | 0.000 | 0.006 | 288.59 | -3.27 | 0.95 | -3.43 | 0.001 | 0.016 |
| <i>KRT18</i>   | 53.15  | 3.35  | 0.90 | 3.73  | 0.000 | 0.006 | 53.15  | 2.86  | 0.86 | 3.32  | 0.001 | 0.020 |
| <i>FHAD1</i>   | 199.17 | 2.49  | 0.67 | 3.73  | 0.000 | 0.006 | 199.17 | 2.24  | 0.64 | 3.51  | 0.000 | 0.013 |
| <i>DAPP1</i>   | 57.15  | 3.95  | 1.06 | 3.72  | 0.000 | 0.007 | 57.15  | 4.87  | 1.01 | 4.81  | 0.000 | 0.000 |
| <i>RTN1</i>    | 252.14 | -2.27 | 0.61 | -3.72 | 0.000 | 0.007 | 252.14 | -1.93 | 0.58 | -3.31 | 0.001 | 0.021 |
| <i>CHRNA10</i> | 35.28  | 4.27  | 1.15 | 3.72  | 0.000 | 0.007 | 35.28  | 3.28  | 1.10 | 2.98  | 0.003 | 0.045 |
| <i>SLC2A10</i> | 60.57  | 2.48  | 0.67 | 3.71  | 0.000 | 0.007 | 60.57  | 2.28  | 0.64 | 3.57  | 0.000 | 0.011 |
| <i>NDRG4</i>   | 251.52 | -2.67 | 0.72 | -3.71 | 0.000 | 0.007 | 251.52 | -2.59 | 0.69 | -3.77 | 0.000 | 0.006 |
| <i>SPAG17</i>  | 69.65  | 4.31  | 1.16 | 3.71  | 0.000 | 0.007 | 69.65  | 4.52  | 1.11 | 4.07  | 0.000 | 0.003 |
| <i>RARRES2</i> | 135.50 | 3.19  | 0.86 | 3.71  | 0.000 | 0.007 | 135.50 | 2.59  | 0.83 | 3.13  | 0.002 | 0.032 |
| <i>KIF1A</i>   | 940.98 | -3.15 | 0.85 | -3.70 | 0.000 | 0.007 | 940.98 | -3.00 | 0.81 | -3.69 | 0.000 | 0.008 |
| <i>PNMA2</i>   | 242.33 | -2.90 | 0.78 | -3.70 | 0.000 | 0.007 | 242.33 | -3.15 | 0.75 | -4.21 | 0.000 | 0.002 |
| <i>IGF1</i>    | 83.62  | 3.11  | 0.84 | 3.70  | 0.000 | 0.007 | 83.62  | 2.44  | 0.81 | 3.03  | 0.002 | 0.041 |
| <i>TRPV4</i>   | 50.02  | 3.91  | 1.06 | 3.70  | 0.000 | 0.007 | 50.02  | 4.23  | 1.01 | 4.19  | 0.000 | 0.002 |
| <i>NDRG2</i>   | 355.86 | -1.97 | 0.53 | -3.69 | 0.000 | 0.007 | 355.86 | -1.63 | 0.51 | -3.20 | 0.001 | 0.027 |
| <i>CLASP2</i>  | 347.29 | -2.01 | 0.54 | -3.69 | 0.000 | 0.007 | 347.29 | -1.67 | 0.52 | -3.23 | 0.001 | 0.025 |
| <i>DLG2</i>    | 285.90 | -3.13 | 0.85 | -3.69 | 0.000 | 0.007 | 285.90 | -3.22 | 0.81 | -3.99 | 0.000 | 0.003 |
| <i>WNT4</i>    | 68.80  | 2.81  | 0.76 | 3.69  | 0.000 | 0.007 | 68.80  | 3.56  | 0.72 | 4.92  | 0.000 | 0.000 |
| <i>CD8A</i>    | 50.32  | 2.93  | 0.80 | 3.68  | 0.000 | 0.007 | 50.32  | 2.49  | 0.76 | 3.28  | 0.001 | 0.022 |
| <i>SEPT4</i>   | 408.90 | -1.77 | 0.48 | -3.68 | 0.000 | 0.007 | 408.90 | -1.39 | 0.46 | -3.04 | 0.002 | 0.040 |
| <i>SLC15A3</i> | 153.49 | 2.42  | 0.66 | 3.68  | 0.000 | 0.007 | 153.49 | 1.92  | 0.63 | 3.05  | 0.002 | 0.039 |
| <i>USP54</i>   | 317.46 | -2.45 | 0.67 | -3.68 | 0.000 | 0.007 | 317.46 | -2.03 | 0.63 | -3.20 | 0.001 | 0.027 |
| <i>FAM20A</i>  | 134.96 | 2.06  | 0.56 | 3.67  | 0.000 | 0.007 | 134.96 | 1.90  | 0.54 | 3.55  | 0.000 | 0.012 |

|                |        |       |      |       |       |       |        |       |      |       |       |       |
|----------------|--------|-------|------|-------|-------|-------|--------|-------|------|-------|-------|-------|
| <i>FLT1</i>    | 697.55 | -2.10 | 0.57 | -3.67 | 0.000 | 0.007 | 697.55 | -2.11 | 0.55 | -3.87 | 0.000 | 0.005 |
| <i>DNAJC6</i>  | 199.18 | -2.66 | 0.72 | -3.67 | 0.000 | 0.007 | 199.18 | -2.71 | 0.69 | -3.94 | 0.000 | 0.004 |
| <i>TNC</i>     | 591.86 | 3.24  | 0.88 | 3.66  | 0.000 | 0.008 | 591.86 | 3.74  | 0.85 | 4.42  | 0.000 | 0.001 |
| <i>NR1H3</i>   | 84.35  | 2.41  | 0.66 | 3.66  | 0.000 | 0.008 | 84.35  | 2.32  | 0.63 | 3.69  | 0.000 | 0.008 |
| <i>PLEKHG3</i> | 363.09 | -1.37 | 0.37 | -3.66 | 0.000 | 0.008 | 363.09 | -1.34 | 0.36 | -3.76 | 0.000 | 0.007 |
| <i>JPH4</i>    | 121.85 | -2.98 | 0.82 | -3.65 | 0.000 | 0.008 | 121.85 | -3.63 | 0.78 | -4.65 | 0.000 | 0.000 |
| <i>COL12A1</i> | 488.93 | 2.79  | 0.77 | 3.64  | 0.000 | 0.008 | 488.93 | 2.46  | 0.73 | 3.36  | 0.001 | 0.019 |
| <i>NRARP</i>   | 56.43  | -2.77 | 0.76 | -3.64 | 0.000 | 0.008 | 56.43  | -2.57 | 0.72 | -3.58 | 0.000 | 0.011 |
| <i>BRSK1</i>   | 128.54 | -2.44 | 0.67 | -3.64 | 0.000 | 0.008 | 128.54 | -3.24 | 0.65 | -5.01 | 0.000 | 0.000 |
| <i>SYT7</i>    | 140.45 | -3.38 | 0.93 | -3.64 | 0.000 | 0.008 | 140.45 | -4.18 | 0.89 | -4.73 | 0.000 | 0.000 |
| <i>CRNN</i>    | 55.02  | 5.24  | 1.44 | 3.63  | 0.000 | 0.008 | 55.02  | 4.15  | 1.38 | 3.00  | 0.003 | 0.043 |
| <i>ZBTB7C</i>  | 131.18 | 1.96  | 0.54 | 3.63  | 0.000 | 0.008 | 131.18 | 1.64  | 0.51 | 3.18  | 0.001 | 0.028 |
| <i>ALDH3B1</i> | 80.53  | 2.51  | 0.69 | 3.63  | 0.000 | 0.008 | 80.53  | 2.36  | 0.66 | 3.58  | 0.000 | 0.011 |
| <i>NRP1</i>    | 780.55 | 1.82  | 0.50 | 3.63  | 0.000 | 0.009 | 780.55 | 1.92  | 0.48 | 4.00  | 0.000 | 0.003 |
| <i>GATA6</i>   | 52.29  | 3.77  | 1.04 | 3.62  | 0.000 | 0.009 | 52.29  | 5.18  | 0.99 | 5.24  | 0.000 | 0.000 |
| <i>NFIX</i>    | 389.75 | -1.80 | 0.50 | -3.62 | 0.000 | 0.009 | 389.75 | -1.80 | 0.48 | -3.78 | 0.000 | 0.006 |
| <i>RAP1GAP</i> | 156.20 | -3.48 | 0.96 | -3.62 | 0.000 | 0.009 | 156.20 | -4.02 | 0.92 | -4.39 | 0.000 | 0.001 |
| <i>NEFM</i>    | 307.21 | -3.07 | 0.85 | -3.62 | 0.000 | 0.009 | 307.21 | -3.34 | 0.81 | -4.11 | 0.000 | 0.002 |
| <i>IL2RB</i>   | 62.90  | 2.48  | 0.69 | 3.61  | 0.000 | 0.009 | 62.90  | 2.30  | 0.66 | 3.51  | 0.000 | 0.013 |
| <i>STXBP2</i>  | 54.39  | 2.61  | 0.72 | 3.60  | 0.000 | 0.009 | 54.39  | 2.13  | 0.70 | 3.06  | 0.002 | 0.038 |
| <i>TRIM2</i>   | 287.80 | -2.06 | 0.57 | -3.60 | 0.000 | 0.009 | 287.80 | -2.27 | 0.55 | -4.16 | 0.000 | 0.002 |
| <i>SIK3</i>    | 380.37 | -1.32 | 0.37 | -3.60 | 0.000 | 0.009 | 380.37 | -1.09 | 0.35 | -3.13 | 0.002 | 0.032 |
| <i>CXCL12</i>  | 230.51 | 1.82  | 0.51 | 3.59  | 0.000 | 0.009 | 230.51 | 2.06  | 0.48 | 4.26  | 0.000 | 0.001 |
| <i>SPHK1</i>   | 75.36  | 3.29  | 0.92 | 3.59  | 0.000 | 0.009 | 75.36  | 2.64  | 0.88 | 3.01  | 0.003 | 0.042 |
| <i>RIMS2</i>   | 241.06 | -5.25 | 1.46 | -3.59 | 0.000 | 0.009 | 241.06 | -5.55 | 1.38 | -4.01 | 0.000 | 0.003 |



|                 |         |       |      |       |       |       |         |       |      |       |       |       |
|-----------------|---------|-------|------|-------|-------|-------|---------|-------|------|-------|-------|-------|
| <i>HGF</i>      | 88.13   | 2.43  | 0.68 | 3.59  | 0.000 | 0.009 | 88.13   | 2.44  | 0.65 | 3.77  | 0.000 | 0.006 |
| <i>IGFBP5</i>   | 4469.35 | 1.86  | 0.52 | 3.59  | 0.000 | 0.009 | 4469.35 | 1.98  | 0.49 | 3.99  | 0.000 | 0.003 |
| <i>CPVL</i>     | 99.33   | 2.29  | 0.64 | 3.58  | 0.000 | 0.010 | 99.33   | 2.40  | 0.61 | 3.94  | 0.000 | 0.004 |
| <i>ENC1</i>     | 200.47  | -3.33 | 0.93 | -3.58 | 0.000 | 0.010 | 200.47  | -3.25 | 0.89 | -3.68 | 0.000 | 0.008 |
| <i>PDZD4</i>    | 187.68  | -2.47 | 0.69 | -3.58 | 0.000 | 0.010 | 187.68  | -2.72 | 0.66 | -4.12 | 0.000 | 0.002 |
| <i>RAPGEF2</i>  | 511.48  | -1.72 | 0.48 | -3.58 | 0.000 | 0.010 | 511.48  | -1.66 | 0.46 | -3.61 | 0.000 | 0.010 |
| <i>EN1</i>      | 38.91   | 4.67  | 1.31 | 3.58  | 0.000 | 0.010 | 38.91   | 3.81  | 1.25 | 3.04  | 0.002 | 0.040 |
| <i>ATP1B1</i>   | 209.86  | -2.40 | 0.67 | -3.57 | 0.000 | 0.010 | 209.86  | -2.07 | 0.64 | -3.24 | 0.001 | 0.025 |
| <i>DPEP2</i>    | 80.52   | 2.87  | 0.80 | 3.57  | 0.000 | 0.010 | 80.52   | 2.96  | 0.77 | 3.86  | 0.000 | 0.005 |
| <i>MSR1</i>     | 215.32  | 2.59  | 0.73 | 3.57  | 0.000 | 0.010 | 215.32  | 3.45  | 0.69 | 4.98  | 0.000 | 0.000 |
| <i>SHC3</i>     | 208.65  | -2.95 | 0.83 | -3.57 | 0.000 | 0.010 | 208.65  | -2.89 | 0.78 | -3.68 | 0.000 | 0.008 |
| <i>CCP110</i>   | 150.01  | -2.16 | 0.60 | -3.57 | 0.000 | 0.010 | 150.01  | -1.75 | 0.57 | -3.08 | 0.002 | 0.036 |
| <i>LTF</i>      | 138.73  | 3.59  | 1.01 | 3.57  | 0.000 | 0.010 | 138.73  | 3.03  | 0.96 | 3.14  | 0.002 | 0.031 |
| <i>PTPN6</i>    | 161.88  | 1.82  | 0.51 | 3.57  | 0.000 | 0.010 | 161.88  | 1.64  | 0.49 | 3.34  | 0.001 | 0.019 |
| <i>RBP5</i>     | 21.24   | 4.45  | 1.25 | 3.57  | 0.000 | 0.010 | 21.24   | 4.29  | 1.19 | 3.59  | 0.000 | 0.010 |
| <i>TRAF3IP3</i> | 108.25  | 2.23  | 0.63 | 3.56  | 0.000 | 0.010 | 108.25  | 2.81  | 0.60 | 4.73  | 0.000 | 0.000 |
| <i>A2ML1</i>    | 59.31   | 4.13  | 1.16 | 3.56  | 0.000 | 0.010 | 59.31   | 3.84  | 1.11 | 3.46  | 0.001 | 0.015 |
| <i>CABP1</i>    | 118.51  | -6.33 | 1.78 | -3.55 | 0.000 | 0.010 | 118.51  | -6.72 | 1.66 | -4.06 | 0.000 | 0.003 |
| <i>MTURN</i>    | 823.38  | -2.68 | 0.75 | -3.55 | 0.000 | 0.010 | 823.38  | -2.12 | 0.72 | -2.95 | 0.003 | 0.048 |
| <i>TBXAS1</i>   | 117.56  | 1.98  | 0.56 | 3.56  | 0.000 | 0.010 | 117.56  | 1.70  | 0.53 | 3.19  | 0.001 | 0.028 |
| <i>PRKCB</i>    | 376.83  | -2.08 | 0.59 | -3.55 | 0.000 | 0.010 | 376.83  | -2.65 | 0.56 | -4.71 | 0.000 | 0.000 |
| <i>MLPH</i>     | 90.72   | 2.19  | 0.62 | 3.55  | 0.000 | 0.010 | 90.72   | 2.54  | 0.59 | 4.34  | 0.000 | 0.001 |
| <i>ESPL1</i>    | 57.23   | 3.62  | 1.02 | 3.55  | 0.000 | 0.010 | 57.23   | 3.42  | 0.97 | 3.51  | 0.000 | 0.013 |
| <i>RIMS4</i>    | 59.23   | -5.13 | 1.45 | -3.54 | 0.000 | 0.011 | 59.23   | -6.11 | 1.36 | -4.51 | 0.000 | 0.001 |
| <i>HSH2D</i>    | 42.84   | 3.74  | 1.06 | 3.54  | 0.000 | 0.011 | 42.84   | 3.87  | 1.01 | 3.84  | 0.000 | 0.005 |

|                  |        |       |      |       |       |       |        |       |      |       |       |       |
|------------------|--------|-------|------|-------|-------|-------|--------|-------|------|-------|-------|-------|
| <i>EPHA4</i>     | 175.95 | -2.23 | 0.63 | -3.53 | 0.000 | 0.011 | 175.95 | -1.76 | 0.60 | -2.94 | 0.003 | 0.049 |
| <i>RIMS1</i>     | 240.98 | -2.81 | 0.80 | -3.53 | 0.000 | 0.011 | 240.98 | -2.69 | 0.76 | -3.54 | 0.000 | 0.012 |
| <i>PTAFR</i>     | 84.74  | 2.43  | 0.69 | 3.53  | 0.000 | 0.011 | 84.74  | 2.20  | 0.66 | 3.33  | 0.001 | 0.020 |
| <i>TMEM154</i>   | 87.48  | 2.37  | 0.67 | 3.52  | 0.000 | 0.011 | 87.48  | 2.11  | 0.64 | 3.28  | 0.001 | 0.022 |
| <i>CAMKV</i>     | 104.82 | -7.27 | 2.07 | -3.52 | 0.000 | 0.011 | 104.82 | -8.16 | 1.95 | -4.18 | 0.000 | 0.002 |
| <i>ENO2</i>      | 256.59 | -2.15 | 0.61 | -3.52 | 0.000 | 0.011 | 256.59 | -2.34 | 0.58 | -4.00 | 0.000 | 0.003 |
| <i>CD86</i>      | 65.58  | 2.19  | 0.62 | 3.51  | 0.000 | 0.011 | 65.58  | 2.63  | 0.59 | 4.45  | 0.000 | 0.001 |
| <i>CDH23</i>     | 367.61 | 1.84  | 0.52 | 3.51  | 0.000 | 0.011 | 367.61 | 1.64  | 0.50 | 3.26  | 0.001 | 0.023 |
| <i>CHI3L1</i>    | 261.24 | 2.91  | 0.83 | 3.51  | 0.000 | 0.011 | 261.24 | 2.33  | 0.80 | 2.93  | 0.003 | 0.050 |
| <i>MRC2</i>      | 397.90 | 2.21  | 0.63 | 3.51  | 0.000 | 0.011 | 397.90 | 1.87  | 0.60 | 3.10  | 0.002 | 0.034 |
| <i>DOK2</i>      | 49.51  | 4.17  | 1.19 | 3.51  | 0.000 | 0.011 | 49.51  | 3.79  | 1.14 | 3.33  | 0.001 | 0.020 |
| <i>JPH3</i>      | 111.60 | -7.42 | 2.12 | -3.50 | 0.000 | 0.012 | 111.60 | -8.27 | 2.00 | -4.13 | 0.000 | 0.002 |
| <i>MR1</i>       | 96.60  | 2.00  | 0.57 | 3.50  | 0.000 | 0.012 | 96.60  | 2.09  | 0.54 | 3.84  | 0.000 | 0.005 |
| <i>CIT</i>       | 389.70 | -1.95 | 0.56 | -3.49 | 0.000 | 0.012 | 389.70 | -2.40 | 0.53 | -4.50 | 0.000 | 0.001 |
| <i>PCED1B</i>    | 44.31  | 2.73  | 0.78 | 3.49  | 0.000 | 0.012 | 44.31  | 2.57  | 0.75 | 3.44  | 0.001 | 0.015 |
| <i>UNC13C</i>    | 131.11 | -4.13 | 1.19 | -3.48 | 0.000 | 0.012 | 131.11 | -4.30 | 1.12 | -3.84 | 0.000 | 0.005 |
| <i>PSORS1C1</i>  | 64.47  | 3.19  | 0.92 | 3.48  | 0.000 | 0.012 | 64.47  | 2.89  | 0.87 | 3.31  | 0.001 | 0.021 |
| <i>RBM47</i>     | 135.70 | 2.11  | 0.61 | 3.48  | 0.001 | 0.013 | 135.70 | 2.25  | 0.58 | 3.89  | 0.000 | 0.004 |
| <i>CDKN2B</i>    | 53.77  | 2.44  | 0.70 | 3.47  | 0.001 | 0.013 | 53.77  | 2.71  | 0.67 | 4.07  | 0.000 | 0.003 |
| <i>KIAA0226L</i> | 57.83  | 3.02  | 0.87 | 3.47  | 0.001 | 0.013 | 57.83  | 2.67  | 0.83 | 3.21  | 0.001 | 0.026 |
| <i>CX3CL1</i>    | 468.97 | -2.82 | 0.81 | -3.47 | 0.001 | 0.013 | 468.97 | -3.59 | 0.78 | -4.58 | 0.000 | 0.001 |
| <i>ITM2C</i>     | 285.90 | -2.29 | 0.66 | -3.47 | 0.001 | 0.013 | 285.90 | -2.19 | 0.63 | -3.47 | 0.001 | 0.014 |
| <i>APC</i>       | 462.60 | -1.52 | 0.44 | -3.47 | 0.001 | 0.013 | 462.60 | -1.36 | 0.42 | -3.25 | 0.001 | 0.024 |
| <i>ALDOC</i>     | 127.43 | -2.30 | 0.66 | -3.46 | 0.001 | 0.013 | 127.43 | -1.97 | 0.63 | -3.13 | 0.002 | 0.032 |
| <i>NRP2</i>      | 437.83 | 1.77  | 0.51 | 3.46  | 0.001 | 0.013 | 437.83 | 1.79  | 0.49 | 3.67  | 0.000 | 0.008 |

|                   |        |       |      |       |       |       |        |       |      |       |       |       |
|-------------------|--------|-------|------|-------|-------|-------|--------|-------|------|-------|-------|-------|
| <i>ADGRB3</i>     | 166.46 | -3.32 | 0.96 | -3.46 | 0.001 | 0.013 | 166.46 | -2.67 | 0.91 | -2.95 | 0.003 | 0.048 |
| <i>IL10RA</i>     | 273.46 | 1.68  | 0.49 | 3.46  | 0.001 | 0.013 | 273.46 | 1.95  | 0.47 | 4.20  | 0.000 | 0.002 |
| <i>NLGN1</i>      | 61.32  | -5.00 | 1.45 | -3.46 | 0.001 | 0.013 | 61.32  | -5.70 | 1.34 | -4.25 | 0.000 | 0.001 |
| <i>LSP1</i>       | 289.68 | 2.64  | 0.76 | 3.45  | 0.001 | 0.014 | 289.68 | 2.21  | 0.73 | 3.02  | 0.002 | 0.041 |
| <i>SLC22A18</i>   | 62.60  | 2.52  | 0.73 | 3.45  | 0.001 | 0.014 | 62.60  | 2.24  | 0.70 | 3.20  | 0.001 | 0.027 |
| <i>FCRL5</i>      | 87.74  | 4.46  | 1.29 | 3.44  | 0.001 | 0.014 | 87.74  | 5.32  | 1.24 | 4.30  | 0.000 | 0.001 |
| <i>RCCI</i>       | 51.49  | 2.33  | 0.68 | 3.44  | 0.001 | 0.014 | 51.49  | 2.12  | 0.65 | 3.29  | 0.001 | 0.022 |
| <i>RNF125</i>     | 39.23  | 2.72  | 0.79 | 3.44  | 0.001 | 0.014 | 39.23  | 2.24  | 0.76 | 2.96  | 0.003 | 0.047 |
| <i>ZDHHC22</i>    | 53.34  | -4.31 | 1.26 | -3.43 | 0.001 | 0.014 | 53.34  | -4.69 | 1.17 | -3.99 | 0.000 | 0.003 |
| <i>OXR1</i>       | 223.75 | -2.36 | 0.69 | -3.43 | 0.001 | 0.014 | 223.75 | -2.16 | 0.65 | -3.30 | 0.001 | 0.021 |
| <i>GRIK2</i>      | 59.00  | -5.19 | 1.52 | -3.42 | 0.001 | 0.014 | 59.00  | -4.93 | 1.40 | -3.53 | 0.000 | 0.012 |
| <i>MMP19</i>      | 155.05 | 4.12  | 1.21 | 3.42  | 0.001 | 0.015 | 155.05 | 4.64  | 1.15 | 4.03  | 0.000 | 0.003 |
| <i>ADSSL1</i>     | 59.13  | 3.06  | 0.90 | 3.42  | 0.001 | 0.015 | 59.13  | 2.65  | 0.85 | 3.10  | 0.002 | 0.034 |
| <i>ELN</i>        | 336.00 | 1.97  | 0.58 | 3.41  | 0.001 | 0.015 | 336.00 | 2.22  | 0.55 | 4.02  | 0.000 | 0.003 |
| <i>CPLX1</i>      | 65.55  | -2.73 | 0.80 | -3.41 | 0.001 | 0.015 | 65.55  | -3.14 | 0.77 | -4.09 | 0.000 | 0.002 |
| <i>AL354822.1</i> | 30.54  | 4.65  | 1.37 | 3.40  | 0.001 | 0.015 | 30.54  | 4.72  | 1.31 | 3.61  | 0.000 | 0.010 |
| <i>CAMK1D</i>     | 225.59 | -1.86 | 0.55 | -3.40 | 0.001 | 0.015 | 225.59 | -1.56 | 0.52 | -3.01 | 0.003 | 0.042 |
| <i>LINGO1</i>     | 89.22  | -2.45 | 0.72 | -3.40 | 0.001 | 0.015 | 89.22  | -2.72 | 0.68 | -3.97 | 0.000 | 0.004 |
| <i>PLBD1</i>      | 75.02  | 2.76  | 0.81 | 3.40  | 0.001 | 0.015 | 75.02  | 2.98  | 0.77 | 3.86  | 0.000 | 0.005 |
| <i>PTK7</i>       | 148.78 | 2.35  | 0.69 | 3.40  | 0.001 | 0.015 | 148.78 | 1.98  | 0.66 | 3.00  | 0.003 | 0.044 |
| <i>RFLNB</i>      | 50.75  | 2.62  | 0.77 | 3.39  | 0.001 | 0.015 | 50.75  | 2.66  | 0.73 | 3.62  | 0.000 | 0.010 |
| <i>LCP2</i>       | 278.06 | 1.45  | 0.43 | 3.39  | 0.001 | 0.016 | 278.06 | 1.29  | 0.41 | 3.14  | 0.002 | 0.031 |
| <i>SYNGR1</i>     | 176.87 | -2.73 | 0.81 | -3.39 | 0.001 | 0.016 | 176.87 | -2.82 | 0.77 | -3.66 | 0.000 | 0.008 |
| <i>SPECCI</i>     | 451.15 | -1.38 | 0.41 | -3.38 | 0.001 | 0.016 | 451.15 | -1.34 | 0.39 | -3.43 | 0.001 | 0.015 |
| <i>HPGDS</i>      | 37.44  | 4.23  | 1.25 | 3.37  | 0.001 | 0.016 | 37.44  | 5.51  | 1.19 | 4.61  | 0.000 | 0.000 |

|                    |        |       |      |       |       |       |        |       |      |       |       |       |
|--------------------|--------|-------|------|-------|-------|-------|--------|-------|------|-------|-------|-------|
| <i>RP3-329A5.4</i> | 111.70 | 2.48  | 0.74 | 3.37  | 0.001 | 0.016 | 111.70 | 2.62  | 0.70 | 3.72  | 0.000 | 0.007 |
| <i>HJURP</i>       | 44.77  | 4.00  | 1.19 | 3.37  | 0.001 | 0.016 | 44.77  | 4.05  | 1.13 | 3.58  | 0.000 | 0.011 |
| <i>KCNT1</i>       | 163.81 | -3.40 | 1.01 | -3.37 | 0.001 | 0.016 | 163.81 | -3.46 | 0.96 | -3.62 | 0.000 | 0.010 |
| <i>MUC3A</i>       | 506.41 | 4.44  | 1.32 | 3.36  | 0.001 | 0.017 | 506.41 | 3.83  | 1.26 | 3.03  | 0.002 | 0.040 |
| <i>ST8SIA3</i>     | 117.33 | -6.98 | 2.08 | -3.36 | 0.001 | 0.017 | 117.33 | -7.80 | 1.96 | -3.98 | 0.000 | 0.003 |
| <i>SELL</i>        | 62.95  | 2.33  | 0.69 | 3.35  | 0.001 | 0.017 | 62.95  | 2.42  | 0.66 | 3.67  | 0.000 | 0.008 |
| <i>MTUS1</i>       | 498.39 | -2.20 | 0.66 | -3.35 | 0.001 | 0.017 | 498.39 | -1.93 | 0.63 | -3.08 | 0.002 | 0.036 |
| <i>BOC</i>         | 186.03 | 1.56  | 0.47 | 3.35  | 0.001 | 0.017 | 186.03 | 1.96  | 0.44 | 4.43  | 0.000 | 0.001 |
| <i>TBR1</i>        | 79.52  | -4.16 | 1.24 | -3.35 | 0.001 | 0.017 | 79.52  | -4.79 | 1.16 | -4.11 | 0.000 | 0.002 |
| <i>RBFOX3</i>      | 118.24 | -6.83 | 2.04 | -3.35 | 0.001 | 0.018 | 118.24 | -7.66 | 1.92 | -3.98 | 0.000 | 0.003 |
| <i>TRAM2</i>       | 214.81 | 1.65  | 0.49 | 3.34  | 0.001 | 0.018 | 214.81 | 1.57  | 0.47 | 3.32  | 0.001 | 0.020 |
| <i>GABRA5</i>      | 60.12  | -4.96 | 1.49 | -3.34 | 0.001 | 0.018 | 60.12  | -5.47 | 1.38 | -3.97 | 0.000 | 0.004 |
| <i>SV2A</i>        | 169.65 | -2.42 | 0.72 | -3.34 | 0.001 | 0.018 | 169.65 | -2.94 | 0.69 | -4.23 | 0.000 | 0.002 |
| <i>LANCLI</i>      | 141.65 | -1.83 | 0.55 | -3.33 | 0.001 | 0.018 | 141.65 | -1.54 | 0.52 | -2.98 | 0.003 | 0.045 |
| <i>ITGAM</i>       | 162.96 | 1.53  | 0.46 | 3.33  | 0.001 | 0.018 | 162.96 | 1.71  | 0.44 | 3.89  | 0.000 | 0.004 |
| <i>RAB7B</i>       | 42.62  | 2.85  | 0.86 | 3.33  | 0.001 | 0.018 | 42.62  | 3.05  | 0.81 | 3.74  | 0.000 | 0.007 |
| <i>F5</i>          | 102.06 | 3.03  | 0.91 | 3.33  | 0.001 | 0.018 | 102.06 | 3.34  | 0.87 | 3.85  | 0.000 | 0.005 |
| <i>BRCA2</i>       | 70.79  | 2.34  | 0.70 | 3.32  | 0.001 | 0.018 | 70.79  | 2.17  | 0.67 | 3.24  | 0.001 | 0.025 |
| <i>SNX8</i>        | 107.91 | 1.53  | 0.46 | 3.32  | 0.001 | 0.019 | 107.91 | 1.38  | 0.44 | 3.15  | 0.002 | 0.030 |
| <i>NXPH4</i>       | 27.09  | 3.60  | 1.09 | 3.32  | 0.001 | 0.019 | 27.09  | 3.18  | 1.04 | 3.06  | 0.002 | 0.037 |
| <i>RILPL2</i>      | 136.52 | 1.90  | 0.57 | 3.32  | 0.001 | 0.019 | 136.52 | 1.76  | 0.55 | 3.23  | 0.001 | 0.025 |
| <i>ABCA4</i>       | 87.09  | 3.00  | 0.91 | 3.32  | 0.001 | 0.019 | 87.09  | 2.61  | 0.87 | 3.01  | 0.003 | 0.042 |
| <i>CISH</i>        | 86.62  | 2.63  | 0.79 | 3.32  | 0.001 | 0.019 | 86.62  | 2.33  | 0.76 | 3.07  | 0.002 | 0.036 |
| <i>PPFIA2</i>      | 157.60 | -2.20 | 0.66 | -3.32 | 0.001 | 0.019 | 157.60 | -2.78 | 0.63 | -4.38 | 0.000 | 0.001 |
| <i>CCAR1</i>       | 254.21 | -1.51 | 0.46 | -3.31 | 0.001 | 0.019 | 254.21 | -1.36 | 0.43 | -3.13 | 0.002 | 0.032 |

|                 |        |       |      |       |       |       |        |       |      |       |       |       |
|-----------------|--------|-------|------|-------|-------|-------|--------|-------|------|-------|-------|-------|
| <i>UVSSA</i>    | 237.77 | 1.43  | 0.43 | 3.31  | 0.001 | 0.019 | 237.77 | 1.36  | 0.41 | 3.29  | 0.001 | 0.022 |
| <i>MAST3</i>    | 323.03 | -1.80 | 0.54 | -3.31 | 0.001 | 0.019 | 323.03 | -2.31 | 0.52 | -4.41 | 0.000 | 0.001 |
| <i>TMPRSS13</i> | 52.98  | 4.97  | 1.51 | 3.30  | 0.001 | 0.019 | 52.98  | 4.40  | 1.44 | 3.05  | 0.002 | 0.039 |
| <i>ESR1</i>     | 62.70  | 4.05  | 1.23 | 3.30  | 0.001 | 0.020 | 62.70  | 4.68  | 1.17 | 3.99  | 0.000 | 0.003 |
| <i>EYA2</i>     | 61.81  | 2.93  | 0.89 | 3.29  | 0.001 | 0.020 | 61.81  | 2.54  | 0.85 | 2.99  | 0.003 | 0.044 |
| <i>KCNJ5</i>    | 107.02 | 2.46  | 0.75 | 3.29  | 0.001 | 0.020 | 107.02 | 2.39  | 0.71 | 3.34  | 0.001 | 0.019 |
| <i>SCUBE1</i>   | 177.75 | 1.99  | 0.61 | 3.28  | 0.001 | 0.020 | 177.75 | 2.11  | 0.58 | 3.65  | 0.000 | 0.009 |
| <i>GNAO1</i>    | 387.83 | -2.36 | 0.72 | -3.28 | 0.001 | 0.021 | 387.83 | -2.71 | 0.69 | -3.93 | 0.000 | 0.004 |
| <i>JAG2</i>     | 104.83 | -2.43 | 0.74 | -3.28 | 0.001 | 0.021 | 104.83 | -2.09 | 0.70 | -2.99 | 0.003 | 0.044 |
| <i>LMTK2</i>    | 268.23 | -1.52 | 0.46 | -3.27 | 0.001 | 0.021 | 268.23 | -2.03 | 0.44 | -4.58 | 0.000 | 0.001 |
| <i>PDZD2</i>    | 453.54 | -1.52 | 0.46 | -3.27 | 0.001 | 0.021 | 453.54 | -1.49 | 0.44 | -3.36 | 0.001 | 0.018 |
| <i>PTPN22</i>   | 30.54  | 2.92  | 0.89 | 3.27  | 0.001 | 0.021 | 30.54  | 2.50  | 0.85 | 2.93  | 0.003 | 0.050 |
| <i>RASSF5</i>   | 125.66 | 2.05  | 0.63 | 3.27  | 0.001 | 0.021 | 125.66 | 1.79  | 0.60 | 2.98  | 0.003 | 0.045 |
| <i>SLA2</i>     | 23.05  | 3.26  | 1.00 | 3.27  | 0.001 | 0.021 | 23.05  | 2.97  | 0.95 | 3.13  | 0.002 | 0.032 |
| <i>LILRB4</i>   | 104.10 | 1.85  | 0.57 | 3.26  | 0.001 | 0.021 | 104.10 | 1.76  | 0.54 | 3.24  | 0.001 | 0.024 |
| <i>CLIP3</i>    | 235.68 | -1.57 | 0.48 | -3.26 | 0.001 | 0.021 | 235.68 | -1.67 | 0.46 | -3.63 | 0.000 | 0.009 |
| <i>ADAM23</i>   | 89.27  | -2.80 | 0.86 | -3.25 | 0.001 | 0.022 | 89.27  | -2.91 | 0.81 | -3.57 | 0.000 | 0.011 |
| <i>ARHGAP32</i> | 330.94 | -1.78 | 0.55 | -3.25 | 0.001 | 0.022 | 330.94 | -1.85 | 0.52 | -3.54 | 0.000 | 0.012 |
| <i>RIN3</i>     | 240.27 | 1.67  | 0.51 | 3.25  | 0.001 | 0.022 | 240.27 | 1.49  | 0.49 | 3.03  | 0.002 | 0.040 |
| <i>CAP2</i>     | 53.98  | -3.03 | 0.93 | -3.25 | 0.001 | 0.022 | 53.98  | -2.83 | 0.87 | -3.23 | 0.001 | 0.025 |
| <i>ITK</i>      | 61.12  | 2.76  | 0.85 | 3.25  | 0.001 | 0.022 | 61.12  | 2.79  | 0.81 | 3.46  | 0.001 | 0.015 |
| <i>CDH18</i>    | 49.38  | -4.82 | 1.49 | -3.24 | 0.001 | 0.023 | 49.38  | -5.41 | 1.39 | -3.90 | 0.000 | 0.004 |
| <i>DNM3</i>     | 246.11 | -1.73 | 0.53 | -3.24 | 0.001 | 0.023 | 246.11 | -1.76 | 0.51 | -3.45 | 0.001 | 0.015 |
| <i>TNFSF14</i>  | 57.90  | 3.56  | 1.10 | 3.23  | 0.001 | 0.023 | 57.90  | 3.09  | 1.05 | 2.94  | 0.003 | 0.049 |
| <i>KCNC1</i>    | 156.51 | -6.87 | 2.12 | -3.23 | 0.001 | 0.023 | 156.51 | -7.87 | 2.00 | -3.93 | 0.000 | 0.004 |

|                |        |       |      |       |       |       |        |       |      |       |       |       |
|----------------|--------|-------|------|-------|-------|-------|--------|-------|------|-------|-------|-------|
| <i>AK5</i>     | 164.34 | -2.65 | 0.82 | -3.23 | 0.001 | 0.023 | 164.34 | -3.04 | 0.78 | -3.87 | 0.000 | 0.005 |
| <i>ANK3</i>    | 563.83 | -1.79 | 0.56 | -3.23 | 0.001 | 0.023 | 563.83 | -1.96 | 0.53 | -3.69 | 0.000 | 0.008 |
| <i>MGAT5B</i>  | 102.79 | -3.54 | 1.10 | -3.23 | 0.001 | 0.023 | 102.79 | -4.20 | 1.04 | -4.02 | 0.000 | 0.003 |
| <i>ANXA2</i>   | 380.83 | 1.73  | 0.54 | 3.23  | 0.001 | 0.023 | 380.83 | 1.61  | 0.51 | 3.13  | 0.002 | 0.032 |
| <i>ZBP1</i>    | 47.11  | 3.46  | 1.07 | 3.23  | 0.001 | 0.023 | 47.11  | 3.87  | 1.02 | 3.79  | 0.000 | 0.006 |
| <i>SIGLEC1</i> | 183.46 | 3.55  | 1.10 | 3.22  | 0.001 | 0.023 | 183.46 | 3.69  | 1.05 | 3.50  | 0.000 | 0.013 |
| <i>PPP2R2C</i> | 175.15 | -2.90 | 0.90 | -3.22 | 0.001 | 0.024 | 175.15 | -2.85 | 0.86 | -3.33 | 0.001 | 0.020 |
| <i>TPPP</i>    | 496.62 | -2.35 | 0.73 | -3.21 | 0.001 | 0.024 | 496.62 | -3.00 | 0.70 | -4.28 | 0.000 | 0.001 |
| <i>RBFOX2</i>  | 383.02 | -1.48 | 0.46 | -3.21 | 0.001 | 0.024 | 383.02 | -1.43 | 0.44 | -3.26 | 0.001 | 0.023 |
| <i>CLMP</i>    | 53.06  | 2.46  | 0.76 | 3.21  | 0.001 | 0.024 | 53.06  | 2.38  | 0.73 | 3.27  | 0.001 | 0.023 |
| <i>B3GNT7</i>  | 47.65  | 2.49  | 0.78 | 3.21  | 0.001 | 0.024 | 47.65  | 2.50  | 0.74 | 3.38  | 0.001 | 0.017 |
| <i>NOX4</i>    | 32.50  | 3.36  | 1.05 | 3.21  | 0.001 | 0.024 | 32.50  | 3.18  | 1.00 | 3.18  | 0.001 | 0.028 |
| <i>CYBB</i>    | 202.78 | 1.85  | 0.58 | 3.21  | 0.001 | 0.024 | 202.78 | 2.06  | 0.55 | 3.75  | 0.000 | 0.007 |
| <i>SRP14</i>   | 252.84 | -1.97 | 0.62 | -3.21 | 0.001 | 0.024 | 252.84 | -1.82 | 0.59 | -3.10 | 0.002 | 0.034 |
| <i>TACSTD2</i> | 30.05  | 3.54  | 1.10 | 3.21  | 0.001 | 0.024 | 30.05  | 3.16  | 1.05 | 3.00  | 0.003 | 0.043 |
| <i>CD99L2</i>  | 212.03 | -1.66 | 0.52 | -3.21 | 0.001 | 0.024 | 212.03 | -1.69 | 0.49 | -3.41 | 0.001 | 0.016 |
| <i>SPACA6</i>  | 186.76 | 1.93  | 0.60 | 3.20  | 0.001 | 0.024 | 186.76 | 1.72  | 0.58 | 2.98  | 0.003 | 0.045 |
| <i>CTSW</i>    | 21.85  | 2.84  | 0.89 | 3.20  | 0.001 | 0.025 | 21.85  | 2.77  | 0.84 | 3.28  | 0.001 | 0.022 |
| <i>SH3GL2</i>  | 83.34  | -3.92 | 1.23 | -3.19 | 0.001 | 0.025 | 83.34  | -3.47 | 1.15 | -3.01 | 0.003 | 0.042 |
| <i>SLAMF8</i>  | 47.60  | 3.15  | 0.99 | 3.19  | 0.001 | 0.025 | 47.60  | 3.58  | 0.94 | 3.81  | 0.000 | 0.006 |
| <i>SYTL3</i>   | 64.33  | 2.50  | 0.78 | 3.19  | 0.001 | 0.025 | 64.33  | 2.23  | 0.75 | 2.97  | 0.003 | 0.046 |
| <i>YWHAG</i>   | 648.28 | -2.03 | 0.64 | -3.18 | 0.001 | 0.026 | 648.28 | -2.11 | 0.61 | -3.45 | 0.001 | 0.015 |
| <i>ITGAX</i>   | 314.68 | 1.87  | 0.59 | 3.18  | 0.001 | 0.026 | 314.68 | 2.11  | 0.56 | 3.77  | 0.000 | 0.006 |
| <i>RASAL3</i>  | 145.40 | 2.33  | 0.73 | 3.18  | 0.001 | 0.026 | 145.40 | 2.30  | 0.70 | 3.27  | 0.001 | 0.023 |
| <i>CA10</i>    | 57.00  | -4.58 | 1.45 | -3.17 | 0.002 | 0.026 | 57.00  | -5.11 | 1.34 | -3.81 | 0.000 | 0.006 |

|                |        |       |      |       |       |       |        |       |      |       |       |       |
|----------------|--------|-------|------|-------|-------|-------|--------|-------|------|-------|-------|-------|
| <i>CORIN</i>   | 48.87  | 4.37  | 1.38 | 3.16  | 0.002 | 0.027 | 48.87  | 4.17  | 1.32 | 3.15  | 0.002 | 0.030 |
| <i>KCNH3</i>   | 71.76  | -3.54 | 1.12 | -3.16 | 0.002 | 0.027 | 71.76  | -4.42 | 1.06 | -4.15 | 0.000 | 0.002 |
| <i>KIRREL3</i> | 78.74  | -4.07 | 1.29 | -3.16 | 0.002 | 0.027 | 78.74  | -4.32 | 1.20 | -3.60 | 0.000 | 0.010 |
| <i>SLC6A17</i> | 135.49 | -3.12 | 0.99 | -3.16 | 0.002 | 0.027 | 135.49 | -3.57 | 0.94 | -3.80 | 0.000 | 0.006 |
| <i>P4HA3</i>   | 38.73  | 4.09  | 1.29 | 3.16  | 0.002 | 0.027 | 38.73  | 3.70  | 1.24 | 2.98  | 0.003 | 0.045 |
| <i>UNC80</i>   | 278.55 | -3.12 | 0.99 | -3.15 | 0.002 | 0.027 | 278.55 | -3.11 | 0.94 | -3.30 | 0.001 | 0.021 |
| <i>VSNL1</i>   | 312.25 | -4.93 | 1.56 | -3.15 | 0.002 | 0.027 | 312.25 | -5.57 | 1.50 | -3.72 | 0.000 | 0.007 |
| <i>FI3A1</i>   | 391.24 | 1.89  | 0.60 | 3.15  | 0.002 | 0.028 | 391.24 | 2.61  | 0.57 | 4.57  | 0.000 | 0.001 |
| <i>TARSL2</i>  | 93.28  | -1.61 | 0.51 | -3.15 | 0.002 | 0.028 | 93.28  | -2.19 | 0.49 | -4.50 | 0.000 | 0.001 |
| <i>CD247</i>   | 47.40  | 3.07  | 0.98 | 3.15  | 0.002 | 0.028 | 47.40  | 2.90  | 0.93 | 3.11  | 0.002 | 0.033 |
| <i>PTP4A3</i>  | 148.69 | -2.34 | 0.74 | -3.15 | 0.002 | 0.028 | 148.69 | -2.36 | 0.71 | -3.32 | 0.001 | 0.020 |
| <i>CASPI</i>   | 65.78  | 1.91  | 0.61 | 3.15  | 0.002 | 0.028 | 65.78  | 1.74  | 0.58 | 2.99  | 0.003 | 0.044 |
| <i>CLVS2</i>   | 60.83  | -4.62 | 1.47 | -3.15 | 0.002 | 0.028 | 60.83  | -5.08 | 1.36 | -3.73 | 0.000 | 0.007 |
| <i>CAMK2B</i>  | 120.38 | -2.70 | 0.86 | -3.14 | 0.002 | 0.028 | 120.38 | -3.53 | 0.82 | -4.29 | 0.000 | 0.001 |
| <i>GABRA4</i>  | 88.24  | -5.49 | 1.75 | -3.14 | 0.002 | 0.028 | 88.24  | -6.43 | 1.63 | -3.93 | 0.000 | 0.004 |
| <i>ATL1</i>    | 63.43  | -2.76 | 0.88 | -3.13 | 0.002 | 0.028 | 63.43  | -2.73 | 0.82 | -3.32 | 0.001 | 0.020 |
| <i>LSAMP</i>   | 189.91 | -1.74 | 0.55 | -3.13 | 0.002 | 0.028 | 189.91 | -1.78 | 0.53 | -3.38 | 0.001 | 0.018 |
| <i>SLIT1</i>   | 101.08 | -3.65 | 1.16 | -3.13 | 0.002 | 0.028 | 101.08 | -4.21 | 1.10 | -3.83 | 0.000 | 0.005 |
| <i>TRIM9</i>   | 172.28 | -2.46 | 0.79 | -3.13 | 0.002 | 0.028 | 172.28 | -2.53 | 0.75 | -3.39 | 0.001 | 0.017 |
| <i>TULP4</i>   | 400.74 | -1.33 | 0.42 | -3.13 | 0.002 | 0.028 | 400.74 | -1.35 | 0.41 | -3.32 | 0.001 | 0.020 |
| <i>IRF4</i>    | 71.24  | 3.21  | 1.03 | 3.13  | 0.002 | 0.029 | 71.24  | 3.15  | 0.98 | 3.21  | 0.001 | 0.027 |
| <i>NDNF</i>    | 82.05  | 3.25  | 1.04 | 3.12  | 0.002 | 0.029 | 82.05  | 3.45  | 0.99 | 3.48  | 0.001 | 0.014 |
| <i>ZER1</i>    | 145.46 | -1.45 | 0.46 | -3.12 | 0.002 | 0.029 | 145.46 | -1.36 | 0.44 | -3.08 | 0.002 | 0.036 |
| <i>FZD1</i>    | 120.67 | 1.86  | 0.60 | 3.11  | 0.002 | 0.030 | 120.67 | 1.68  | 0.57 | 2.94  | 0.003 | 0.049 |
| <i>NPTXR</i>   | 109.70 | -3.26 | 1.05 | -3.10 | 0.002 | 0.031 | 109.70 | -3.98 | 1.01 | -3.94 | 0.000 | 0.004 |

|                      |        |       |      |       |       |       |        |       |      |       |       |       |
|----------------------|--------|-------|------|-------|-------|-------|--------|-------|------|-------|-------|-------|
| <i>PRRX1</i>         | 189.29 | 1.46  | 0.47 | 3.10  | 0.002 | 0.031 | 189.29 | 1.52  | 0.45 | 3.39  | 0.001 | 0.017 |
| <i>AGAPI</i>         | 403.71 | -1.23 | 0.40 | -3.10 | 0.002 | 0.031 | 403.71 | -1.25 | 0.38 | -3.29 | 0.001 | 0.022 |
| <i>PRRC2A</i>        | 736.79 | -1.21 | 0.39 | -3.10 | 0.002 | 0.031 | 736.79 | -1.17 | 0.37 | -3.13 | 0.002 | 0.032 |
| <i>STEAP4</i>        | 171.83 | 2.30  | 0.74 | 3.10  | 0.002 | 0.031 | 171.83 | 2.77  | 0.71 | 3.91  | 0.000 | 0.004 |
| <i>KIFC2</i>         | 109.00 | -2.18 | 0.70 | -3.09 | 0.002 | 0.031 | 109.00 | -1.96 | 0.67 | -2.94 | 0.003 | 0.049 |
| <i>ATP2B3</i>        | 116.88 | -3.60 | 1.17 | -3.09 | 0.002 | 0.031 | 116.88 | -4.72 | 1.10 | -4.28 | 0.000 | 0.001 |
| <i>SYN2</i>          | 136.38 | -3.62 | 1.17 | -3.09 | 0.002 | 0.031 | 136.38 | -3.76 | 1.11 | -3.40 | 0.001 | 0.017 |
| <i>LILRB5</i>        | 80.40  | 3.40  | 1.10 | 3.08  | 0.002 | 0.032 | 80.40  | 3.34  | 1.05 | 3.18  | 0.001 | 0.028 |
| <i>PEG3</i>          | 322.55 | -1.75 | 0.57 | -3.08 | 0.002 | 0.032 | 322.55 | -1.89 | 0.54 | -3.49 | 0.000 | 0.013 |
| <i>COL22A1</i>       | 100.15 | 3.16  | 1.03 | 3.08  | 0.002 | 0.032 | 100.15 | 3.16  | 0.98 | 3.22  | 0.001 | 0.025 |
| <i>CAMSAP2</i>       | 343.57 | -1.41 | 0.46 | -3.08 | 0.002 | 0.032 | 343.57 | -1.36 | 0.44 | -3.11 | 0.002 | 0.033 |
| <i>GABRB2</i>        | 129.88 | -5.41 | 1.76 | -3.08 | 0.002 | 0.032 | 129.88 | -6.31 | 1.65 | -3.82 | 0.000 | 0.006 |
| <i>NCKAPI</i>        | 463.33 | -1.37 | 0.45 | -3.08 | 0.002 | 0.032 | 463.33 | -1.25 | 0.43 | -2.93 | 0.003 | 0.050 |
| <i>FAIM2</i>         | 233.98 | -2.83 | 0.92 | -3.08 | 0.002 | 0.032 | 233.98 | -2.98 | 0.88 | -3.39 | 0.001 | 0.017 |
| <i>GDII</i>          | 376.70 | -1.50 | 0.49 | -3.07 | 0.002 | 0.033 | 376.70 | -1.59 | 0.47 | -3.40 | 0.001 | 0.017 |
| <i>FXVD7</i>         | 39.77  | -4.45 | 1.45 | -3.07 | 0.002 | 0.033 | 39.77  | -5.50 | 1.36 | -4.03 | 0.000 | 0.003 |
| <i>GALNT10</i>       | 219.13 | 1.14  | 0.37 | 3.07  | 0.002 | 0.033 | 219.13 | 1.21  | 0.36 | 3.41  | 0.001 | 0.016 |
| <i>CLNK</i>          | 36.69  | 4.24  | 1.38 | 3.06  | 0.002 | 0.033 | 36.69  | 4.87  | 1.32 | 3.69  | 0.000 | 0.008 |
| <i>PCDH7</i>         | 144.70 | -2.43 | 0.79 | -3.06 | 0.002 | 0.033 | 144.70 | -2.42 | 0.75 | -3.23 | 0.001 | 0.025 |
| <i>CNTNAP2</i>       | 187.59 | -3.32 | 1.09 | -3.06 | 0.002 | 0.034 | 187.59 | -3.56 | 1.03 | -3.46 | 0.001 | 0.015 |
| <i>RP11-500G10.1</i> | 52.65  | 2.66  | 0.87 | 3.05  | 0.002 | 0.034 | 52.65  | 2.81  | 0.83 | 3.40  | 0.001 | 0.017 |
| <i>BTBD8</i>         | 127.24 | -2.17 | 0.71 | -3.05 | 0.002 | 0.034 | 127.24 | -2.77 | 0.68 | -4.09 | 0.000 | 0.002 |
| <i>JAKMIP3</i>       | 140.16 | -1.85 | 0.61 | -3.05 | 0.002 | 0.035 | 140.16 | -2.44 | 0.58 | -4.22 | 0.000 | 0.002 |
| <i>RBP1</i>          | 65.87  | 2.30  | 0.75 | 3.05  | 0.002 | 0.035 | 65.87  | 2.62  | 0.71 | 3.67  | 0.000 | 0.008 |
| <i>HTRA3</i>         | 64.12  | 2.38  | 0.78 | 3.05  | 0.002 | 0.035 | 64.12  | 2.36  | 0.75 | 3.16  | 0.002 | 0.029 |



|                 |        |       |      |       |       |       |        |       |      |       |       |       |
|-----------------|--------|-------|------|-------|-------|-------|--------|-------|------|-------|-------|-------|
| <i>CAMTA1</i>   | 204.58 | -1.79 | 0.59 | -3.04 | 0.002 | 0.035 | 204.58 | -1.82 | 0.56 | -3.24 | 0.001 | 0.025 |
| <i>CYB561A3</i> | 89.10  | 1.74  | 0.57 | 3.04  | 0.002 | 0.035 | 89.10  | 1.71  | 0.55 | 3.12  | 0.002 | 0.032 |
| <i>USP11</i>    | 321.02 | -1.56 | 0.51 | -3.04 | 0.002 | 0.035 | 321.02 | -1.96 | 0.49 | -3.99 | 0.000 | 0.003 |
| <i>NOL4</i>     | 55.32  | -4.00 | 1.32 | -3.04 | 0.002 | 0.036 | 55.32  | -4.78 | 1.23 | -3.90 | 0.000 | 0.004 |
| <i>CACNA2D3</i> | 89.36  | -2.99 | 0.99 | -3.03 | 0.002 | 0.037 | 89.36  | -3.23 | 0.93 | -3.47 | 0.001 | 0.014 |
| <i>CTSZ</i>     | 409.42 | 1.69  | 0.56 | 3.02  | 0.003 | 0.037 | 409.42 | 1.58  | 0.53 | 2.96  | 0.003 | 0.047 |
| <i>PHF24</i>    | 134.38 | -3.53 | 1.17 | -3.02 | 0.003 | 0.037 | 134.38 | -3.61 | 1.11 | -3.26 | 0.001 | 0.023 |
| <i>HS6ST3</i>   | 88.43  | -5.47 | 1.81 | -3.02 | 0.003 | 0.037 | 88.43  | -5.68 | 1.68 | -3.37 | 0.001 | 0.018 |
| <i>DPP4</i>     | 53.10  | 2.29  | 0.76 | 3.01  | 0.003 | 0.037 | 53.10  | 2.30  | 0.72 | 3.18  | 0.001 | 0.028 |
| <i>COX6C</i>    | 149.48 | -1.98 | 0.66 | -3.01 | 0.003 | 0.038 | 149.48 | -1.91 | 0.63 | -3.05 | 0.002 | 0.039 |
| <i>GDPD5</i>    | 110.30 | 1.66  | 0.55 | 3.00  | 0.003 | 0.039 | 110.30 | 1.68  | 0.53 | 3.19  | 0.001 | 0.028 |
| <i>PAX5</i>     | 69.84  | 3.55  | 1.18 | 3.00  | 0.003 | 0.039 | 69.84  | 4.15  | 1.12 | 3.69  | 0.000 | 0.008 |
| <i>DDN</i>      | 108.88 | -3.34 | 1.11 | -3.00 | 0.003 | 0.039 | 108.88 | -3.42 | 1.06 | -3.23 | 0.001 | 0.025 |
| <i>CNTNAP5</i>  | 73.21  | -5.71 | 1.91 | -3.00 | 0.003 | 0.039 | 73.21  | -6.44 | 1.79 | -3.60 | 0.000 | 0.010 |
| <i>SYK</i>      | 140.90 | 1.65  | 0.55 | 2.99  | 0.003 | 0.039 | 140.90 | 1.88  | 0.53 | 3.56  | 0.000 | 0.011 |
| <i>CCL3</i>     | 42.01  | 2.69  | 0.90 | 2.99  | 0.003 | 0.040 | 42.01  | 3.36  | 0.85 | 3.93  | 0.000 | 0.004 |
| <i>THEMIS2</i>  | 250.57 | 1.55  | 0.52 | 2.99  | 0.003 | 0.040 | 250.57 | 1.74  | 0.50 | 3.51  | 0.000 | 0.013 |
| <i>MT3</i>      | 69.00  | -3.39 | 1.13 | -2.99 | 0.003 | 0.040 | 69.00  | -3.80 | 1.08 | -3.51 | 0.000 | 0.013 |
| <i>NGEF</i>     | 132.99 | -2.41 | 0.81 | -2.99 | 0.003 | 0.040 | 132.99 | -2.65 | 0.77 | -3.45 | 0.001 | 0.015 |
| <i>CACNG3</i>   | 55.81  | -6.65 | 2.23 | -2.99 | 0.003 | 0.040 | 55.81  | -7.02 | 2.10 | -3.34 | 0.001 | 0.020 |
| <i>SNPH</i>     | 97.80  | -2.79 | 0.94 | -2.98 | 0.003 | 0.040 | 97.80  | -3.07 | 0.89 | -3.44 | 0.001 | 0.015 |
| <i>CIR</i>      | 424.79 | 1.40  | 0.47 | 2.98  | 0.003 | 0.040 | 424.79 | 1.36  | 0.45 | 3.03  | 0.002 | 0.040 |
| <i>C2</i>       | 28.70  | 2.57  | 0.86 | 2.97  | 0.003 | 0.041 | 28.70  | 2.61  | 0.82 | 3.19  | 0.001 | 0.028 |
| <i>HELLS</i>    | 64.84  | 1.97  | 0.66 | 2.97  | 0.003 | 0.041 | 64.84  | 2.21  | 0.63 | 3.51  | 0.000 | 0.013 |
| <i>TOGARAM2</i> | 146.72 | 2.60  | 0.87 | 2.97  | 0.003 | 0.041 | 146.72 | 3.10  | 0.83 | 3.72  | 0.000 | 0.007 |

|                 |         |       |      |       |       |       |         |       |      |       |       |       |
|-----------------|---------|-------|------|-------|-------|-------|---------|-------|------|-------|-------|-------|
| <i>SBFI</i>     | 335.35  | -1.27 | 0.43 | -2.97 | 0.003 | 0.041 | 335.35  | -1.42 | 0.41 | -3.45 | 0.001 | 0.015 |
| <i>GABBR1</i>   | 280.41  | -1.57 | 0.53 | -2.97 | 0.003 | 0.041 | 280.41  | -1.51 | 0.50 | -3.00 | 0.003 | 0.043 |
| <i>CLN3</i>     | 62.76   | 2.52  | 0.85 | 2.97  | 0.003 | 0.042 | 62.76   | 2.45  | 0.81 | 3.02  | 0.003 | 0.041 |
| <i>IL16</i>     | 181.35  | 1.67  | 0.56 | 2.96  | 0.003 | 0.042 | 181.35  | 1.77  | 0.54 | 3.29  | 0.001 | 0.022 |
| <i>CD74</i>     | 3455.18 | 1.75  | 0.59 | 2.96  | 0.003 | 0.043 | 3455.18 | 1.79  | 0.56 | 3.17  | 0.002 | 0.029 |
| <i>OGDHL</i>    | 52.93   | -4.43 | 1.50 | -2.95 | 0.003 | 0.043 | 52.93   | -5.24 | 1.40 | -3.75 | 0.000 | 0.007 |
| <i>SARDH</i>    | 43.28   | 3.16  | 1.07 | 2.95  | 0.003 | 0.043 | 43.28   | 3.86  | 1.02 | 3.78  | 0.000 | 0.006 |
| <i>OPCML</i>    | 89.38   | -3.56 | 1.21 | -2.95 | 0.003 | 0.044 | 89.38   | -4.31 | 1.14 | -3.77 | 0.000 | 0.006 |
| <i>NMNAT2</i>   | 213.54  | -2.55 | 0.87 | -2.95 | 0.003 | 0.044 | 213.54  | -3.53 | 0.83 | -4.26 | 0.000 | 0.001 |
| <i>PSD</i>      | 109.19  | -3.23 | 1.10 | -2.95 | 0.003 | 0.044 | 109.19  | -3.68 | 1.05 | -3.50 | 0.000 | 0.013 |
| <i>DCN</i>      | 581.94  | 1.72  | 0.59 | 2.94  | 0.003 | 0.044 | 581.94  | 1.94  | 0.56 | 3.46  | 0.001 | 0.015 |
| <i>ARHGAP15</i> | 70.88   | 2.11  | 0.72 | 2.94  | 0.003 | 0.044 | 70.88   | 2.38  | 0.68 | 3.48  | 0.000 | 0.014 |
| <i>MAPK8IP2</i> | 134.53  | -2.70 | 0.92 | -2.94 | 0.003 | 0.045 | 134.53  | -2.84 | 0.88 | -3.24 | 0.001 | 0.025 |
| <i>PCDHB7</i>   | 39.79   | 2.64  | 0.90 | 2.94  | 0.003 | 0.045 | 39.79   | 2.80  | 0.85 | 3.29  | 0.001 | 0.022 |
| <i>ADGRG3</i>   | 38.28   | 3.45  | 1.18 | 2.93  | 0.003 | 0.046 | 38.28   | 3.45  | 1.13 | 3.07  | 0.002 | 0.037 |
| <i>CD44</i>     | 546.81  | 1.63  | 0.56 | 2.92  | 0.003 | 0.046 | 546.81  | 1.68  | 0.53 | 3.15  | 0.002 | 0.030 |
| <i>GABRD</i>    | 41.62   | -3.86 | 1.32 | -2.92 | 0.003 | 0.046 | 41.62   | -4.30 | 1.23 | -3.48 | 0.000 | 0.014 |
| <i>SLC12A5</i>  | 176.26  | -2.97 | 1.02 | -2.92 | 0.003 | 0.046 | 176.26  | -3.24 | 0.97 | -3.34 | 0.001 | 0.020 |
| <i>SLC16A10</i> | 55.62   | 3.15  | 1.08 | 2.92  | 0.004 | 0.046 | 55.62   | 3.07  | 1.03 | 2.98  | 0.003 | 0.045 |
| <i>CEMIP</i>    | 777.16  | 1.68  | 0.57 | 2.92  | 0.004 | 0.046 | 777.16  | 1.65  | 0.55 | 2.99  | 0.003 | 0.044 |
| <i>AGAP2</i>    | 280.83  | -1.96 | 0.67 | -2.92 | 0.004 | 0.046 | 280.83  | -2.71 | 0.65 | -4.19 | 0.000 | 0.002 |
| <i>ADAMTS9</i>  | 815.07  | -2.37 | 0.81 | -2.91 | 0.004 | 0.047 | 815.07  | -2.65 | 0.78 | -3.41 | 0.001 | 0.017 |
| <i>UBA2</i>     | 177.33  | -1.52 | 0.52 | -2.91 | 0.004 | 0.047 | 177.33  | -1.49 | 0.50 | -2.98 | 0.003 | 0.045 |
| <i>SLC38A11</i> | 71.17   | -3.41 | 1.17 | -2.90 | 0.004 | 0.048 | 71.17   | -3.94 | 1.11 | -3.55 | 0.000 | 0.012 |
| <i>PCDH8</i>    | 34.49   | -4.31 | 1.48 | -2.90 | 0.004 | 0.048 | 34.49   | -4.59 | 1.37 | -3.34 | 0.001 | 0.020 |

|                |        |       |      |       |       |       |        |       |      |       |       |       |
|----------------|--------|-------|------|-------|-------|-------|--------|-------|------|-------|-------|-------|
| <i>ZNF165</i>  | 33.08  | 3.50  | 1.21 | 2.90  | 0.004 | 0.048 | 33.08  | 5.02  | 1.14 | 4.39  | 0.000 | 0.001 |
| <i>JPH1</i>    | 37.08  | -4.45 | 1.54 | -2.89 | 0.004 | 0.049 | 37.08  | -4.68 | 1.42 | -3.28 | 0.001 | 0.022 |
| <i>PCDH10</i>  | 103.25 | -2.59 | 0.90 | -2.89 | 0.004 | 0.049 | 103.25 | -3.20 | 0.85 | -3.75 | 0.000 | 0.007 |
| <i>SLC6A15</i> | 46.25  | -4.01 | 1.39 | -2.89 | 0.004 | 0.049 | 46.25  | -4.89 | 1.29 | -3.79 | 0.000 | 0.006 |
| <i>STXBP5</i>  | 137.98 | -1.48 | 0.51 | -2.89 | 0.004 | 0.049 | 137.98 | -1.46 | 0.49 | -3.00 | 0.003 | 0.043 |
| <i>SYT13</i>   | 66.00  | -3.62 | 1.25 | -2.89 | 0.004 | 0.049 | 66.00  | -4.22 | 1.18 | -3.57 | 0.000 | 0.011 |
| <i>DENND2D</i> | 80.27  | 2.19  | 0.76 | 2.89  | 0.004 | 0.049 | 80.27  | 2.44  | 0.72 | 3.37  | 0.001 | 0.018 |
| <i>SHANK1</i>  | 142.44 | -2.61 | 0.91 | -2.88 | 0.004 | 0.049 | 142.44 | -2.66 | 0.86 | -3.08 | 0.002 | 0.036 |
| <i>HTR2A</i>   | 27.34  | -3.77 | 1.31 | -2.88 | 0.004 | 0.049 | 27.34  | -4.57 | 1.23 | -3.72 | 0.000 | 0.007 |
| <i>HIF0</i>    | 208.37 | -1.52 | 0.53 | -2.88 | 0.004 | 0.050 | 208.37 | -1.51 | 0.51 | -2.98 | 0.003 | 0.045 |

---

**Supplemental Table 8** *Baseline features of CA patients and non-CA subjects used for plasma miRNA studies*

|                  | Age | Sex | Phenotype                  | CASH/NON-Cash |
|------------------|-----|-----|----------------------------|---------------|
| <b>Sample 1</b>  | 58  | F   | Sporadic/Solitary          | CASH          |
| <b>Sample 2</b>  | 36  | M   | Sporadic/Solitary          | CASH          |
| <b>Sample 3</b>  | 18  | F   | Familial/Multifocal (CCM3) | CASH          |
| <b>Sample 4</b>  | 4   | M   | Familial/Multifocal (CCM1) | CASH          |
| <b>Sample 5</b>  | 59  | F   | Familial/Multifocal (CCM1) | CASH          |
| <b>Sample 6</b>  | 61  | F   | Sporadic/Solitary          | Non-CASH      |
| <b>Sample 7</b>  | 7   | F   | Familial/Multifocal (CCM1) | Non-CASH      |
| <b>Sample 8</b>  | 23  | F   | Familial/Multifocal (CCM3) | Non-CASH      |
| <b>Sample 9</b>  | 10  | M   | Familial/Multifocal (CCM3) | Non-CASH      |
| <b>Sample 10</b> | 19  | M   | Healthy non-CA             | N.A           |
| <b>Sample 11</b> | 27  | F   | Healthy non-CA             | N.A           |
| <b>Sample 12</b> | 30  | F   | Healthy non-CA             | N.A           |

N.A.= Not Applicable

**Supplemental Table 9** Putative mRNA targets of the 13 plasma miRNAs differently expressed in CASH patients (compared to non-CASH) found within the 629 DEGs common between CASH and non-CASH transcriptome

| Genes          | CASH vs. Healthy non-CA |         |                         | Non-CASH vs. Healthy non-CA |         |                         | mRNA target region |
|----------------|-------------------------|---------|-------------------------|-----------------------------|---------|-------------------------|--------------------|
|                | Log2 (Fold Change)      | p-value | p-value (FDR corrected) | Log2 (Fold Change)          | p-value | p-value (FDR corrected) |                    |
| <i>CIT</i>     | -1.95                   | 0.000   | 0.012                   | -2.40                       | 0.000   | 0.001                   | 3'UTR              |
| <i>PTK7</i>    | 2.35                    | 0.001   | 0.015                   | 1.98                        | 0.003   | 0.044                   | 3'UTR              |
| <i>NRP2</i>    | 1.77                    | 0.001   | 0.013                   | 1.79                        | 0.000   | 0.008                   | 3'UTR              |
| <i>ZBTB7C</i>  | 1.96                    | 0.000   | 0.008                   | 1.64                        | 0.001   | 0.028                   | 3'UTR              |
| <i>DUSP4</i>   | 3.55                    | 0.000   | 0.000                   | 2.20                        | 0.001   | 0.019                   | 3'UTR              |
| <i>IL10RA*</i> | 1.68                    | 0.001   | 0.013                   | 1.95                        | 0.000   | 0.002                   | 3'UTR              |
| <i>TSPYL4</i>  | -1.87                   | 0.000   | 0.005                   | -2.20                       | 0.000   | 0.000                   | 3'UTR              |
| <i>PDZD4</i>   | -2.47                   | 0.000   | 0.010                   | -2.72                       | 0.000   | 0.002                   | 3'UTR              |
| <i>TPPP</i>    | -2.35                   | 0.001   | 0.024                   | -3.00                       | 0.000   | 0.001                   | 3'UTR              |
| <i>RASSF5</i>  | 2.05                    | 0.001   | 0.021                   | 1.79                        | 0.003   | 0.045                   | 3'UTR              |
| <i>SBF1</i>    | -1.27                   | 0.003   | 0.041                   | -1.42                       | 0.001   | 0.015                   | 3'UTR              |
| <i>ITPR1</i>   | -2.15                   | 0.000   | 0.001                   | -1.73                       | 0.000   | 0.006                   | 3'UTR              |
| <i>KIF1B</i>   | -1.93                   | 0.000   | 0.000                   | -1.74                       | 0.000   | 0.000                   | 3'UTR              |
| <i>RBFOX2</i>  | -1.48                   | 0.001   | 0.024                   | -1.43                       | 0.001   | 0.023                   | 3'UTR              |
| <i>KIF5C</i>   | -3.89                   | 0.000   | 0.000                   | -3.22                       | 0.000   | 0.000                   | 3'UTR              |
| <i>TLL1</i>    | 2.71                    | 0.000   | 0.000                   | 1.69                        | 0.003   | 0.044                   | 3'UTR              |
| <i>MMP14</i>   | 470.31                  | 2.72    | 0.66                    | 4.11                        | 0.00    | 0.00                    | 5'UTR              |
| <i>KCNN4</i>   | 32.72                   | 4.03    | 0.90                    | 4.49                        | 0.00    | 0.00                    | 5'UTR              |
| <i>ITPR1</i>   | 511.93                  | (2.15)  | 0.48                    | (4.47)                      | 0.00    | 0.00                    | 5'UTR              |
| <i>SEL1L3</i>  | 187.19                  | 1.89    | 0.45                    | 4.23                        | 0.000   | 0.002                   | CDS                |
| <i>LTBP2</i>   | 717.01                  | 4.88    | 0.51                    | 9.48                        | 0.000   | 0.000                   | CDS                |
| <i>ZBTB7C</i>  | 131.18                  | 1.96    | 0.54                    | 3.63                        | 0.000   | 0.008                   | CDS                |
| <i>ADAMTS2</i> | 191.27                  | 3.57    | 0.74                    | 4.83                        | 0.000   | 0.000                   | CDS                |
| <i>BNC2</i>    | 178.44                  | 2.93    | 0.52                    | 5.66                        | 0.000   | 0.000                   | CDS                |
| <i>PRRC2A</i>  | 736.79                  | -1.21   | 0.39                    | -3.10                       | 0.002   | 0.031                   | CDS                |
| <i>EPAS1</i>   | 1968.34                 | -2.14   | 0.51                    | -4.24                       | 0.000   | 0.001                   | CDS                |
| <i>STEAP3</i>  | 102.71                  | 2.55    | 0.66                    | 3.84                        | 0.000   | 0.005                   | CDS                |
| <i>NUGGC</i>   | 38.99                   | 3.71    | 0.98                    | 3.77                        | 0.000   | 0.006                   | CDS                |

|                     |        |       |      |       |       |       |     |
|---------------------|--------|-------|------|-------|-------|-------|-----|
| <i>NRPI</i>         | 780.55 | 1.82  | 0.50 | 3.63  | 0.000 | 0.009 | CDS |
| <i>NOLA</i>         | 55.32  | -4.00 | 1.32 | -3.04 | 0.002 | 0.036 | CDS |
| <i>CRI</i>          | 70.33  | 2.47  | 0.64 | 3.88  | 0.000 | 0.004 | CDS |
| <i>GATA6</i>        | 52.29  | 3.77  | 1.04 | 3.62  | 0.000 | 0.009 | CDS |
| <i>PTPN22</i>       | 30.54  | 2.92  | 0.89 | 3.27  | 0.001 | 0.021 | CDS |
| <i>SLC12A2</i>      | 247.14 | -2.02 | 0.49 | -4.16 | 0.000 | 0.002 | CDS |
| <i>ATP8A1</i>       | 222.91 | -2.10 | 0.56 | -3.75 | 0.000 | 0.006 | CDS |
| <i>ITPR1</i>        | 511.93 | -2.15 | 0.48 | -4.47 | 0.000 | 0.001 | CDS |
| <i>ARHGAP</i><br>32 | 330.94 | -1.78 | 0.55 | -3.25 | 0.001 | 0.022 | CDS |
| <i>MTUS1</i>        | 498.39 | -2.20 | 0.66 | -3.35 | 0.001 | 0.017 | CDS |

\*IL-10 is differently expressed in the plasma of CASH patients and is a molecule in the diagnostic biomarker

**Supplemental Table 10** Putative targets of the 13 plasma miRNAs differently expressed in CASH patients (compared to non-CASH) found within the 398 DEGs identified only CASH transcriptome

| Gene            | Mean    | Log2<br>(Fold Change) | LfcSE | Stat  | p-value | p-value<br>(FDR corrected) | mRNA target<br>region |
|-----------------|---------|-----------------------|-------|-------|---------|----------------------------|-----------------------|
| <i>DNM1L</i>    | 156.01  | -1.42                 | 0.47  | -3.05 | 0.002   | 0.035                      | 3'UTR                 |
| <i>MED29</i>    | 111.67  | -1.53                 | 0.49  | -3.11 | 0.002   | 0.030                      | 3'UTR                 |
| <i>ZDHHC24</i>  | 76.37   | 1.96                  | 0.56  | 3.50  | 0.000   | 0.012                      | 3'UTR                 |
| <i>DENND5B</i>  | 120.01  | -1.60                 | 0.53  | -3.00 | 0.003   | 0.039                      | 3'UTR                 |
| <i>SLCO2A1</i>  | 225.13  | 3.19                  | 0.87  | 3.64  | 0.000   | 0.008                      | 3'UTR                 |
| <i>ORAI2</i>    | 169.28  | 1.95                  | 0.63  | 3.09  | 0.002   | 0.031                      | 3'UTR                 |
| <i>MOAPI</i>    | 92.36   | -2.07                 | 0.70  | -2.94 | 0.003   | 0.045                      | 3'UTR                 |
| <i>LAX1</i>     | 51.17   | 4.32                  | 1.15  | 3.75  | 0.000   | 0.006                      | 3'UTR                 |
| <i>ELF4</i>     | 77.42   | 1.85                  | 0.63  | 2.94  | 0.003   | 0.044                      | 3'UTR                 |
| <i>CHST11</i>   | 167.62  | 1.33                  | 0.45  | 2.93  | 0.003   | 0.045                      | 3'UTR                 |
| <i>BTBD3</i>    | 119.45  | -1.80                 | 0.62  | -2.91 | 0.004   | 0.047                      | 3'UTR                 |
| <i>SHOC2</i>    | 142.25  | -2.06                 | 0.66  | -3.13 | 0.002   | 0.029                      | 3'UTR                 |
| <i>CCDC88A</i>  | 565.82  | -1.28                 | 0.44  | -2.93 | 0.003   | 0.045                      | 3'UTR                 |
| <i>AKAP11</i>   | 414.17  | -2.39                 | 0.64  | -3.71 | 0.000   | 0.007                      | 3'UTR                 |
| <i>FBN1</i>     | 763.24  | 2.00                  | 0.63  | 3.16  | 0.002   | 0.027                      | 5'UTR                 |
| <i>LOXHD1</i>   | 165.90  | 5.53                  | 1.92  | 2.88  | 0.004   | 0.049                      | 5'UTR                 |
| <i>FBN1</i>     | 763.24  | 2.00                  | 0.63  | 3.16  | 0.002   | 0.027                      | CDS                   |
| <i>HIPK2</i>    | 1319.57 | -1.66                 | 0.53  | -3.13 | 0.002   | 0.029                      | CDS                   |
| <i>KIAA1109</i> | 869.68  | -1.75                 | 0.56  | -3.14 | 0.002   | 0.028                      | CDS                   |
| <i>MED29</i>    | 111.67  | -1.53                 | 0.49  | -3.11 | 0.002   | 0.030                      | CDS                   |
| <i>CCDC88A</i>  | 565.82  | -1.28                 | 0.44  | -2.93 | 0.003   | 0.045                      | CDS                   |
| <i>AKAP11</i>   | 414.17  | -2.39                 | 0.64  | -3.71 | 0.000   | 0.007                      | CDS                   |
| <i>UTP15</i>    | 101.02  | 2.85                  | 0.86  | 3.33  | 0.001   | 0.018                      | CDS                   |
| <i>MDN1</i>     | 580.32  | -1.14                 | 0.37  | -3.07 | 0.002   | 0.033                      | CDS                   |
| <i>ELF4</i>     | 77.42   | 1.85                  | 0.63  | 2.94  | 0.003   | 0.044                      | CDS                   |
| <i>ABCC1</i>    | 277.47  | 2.11                  | 0.49  | 4.30  | 0.000   | 0.001                      | CDS                   |
| <i>SLCO2A1</i>  | 225.13  | 3.19                  | 0.87  | 3.64  | 0.000   | 0.008                      | CDS                   |
| <i>ARHGAP21</i> | 526.03  | -1.82                 | 0.52  | -3.53 | 0.000   | 0.011                      | CDS                   |
| <i>DNAAF5</i>   | 88.07   | 1.99                  | 0.62  | 3.23  | 0.001   | 0.023                      | CDS                   |
| <i>LOXHD1</i>   | 165.90  | 5.53                  | 1.92  | 2.88  | 0.004   | 0.049                      | CDS                   |

|             |        |       |      |       |       |       |     |
|-------------|--------|-------|------|-------|-------|-------|-----|
| <i>MKL2</i> | 732.03 | -1.86 | 0.64 | -2.90 | 0.004 | 0.048 | CDS |
| <i>CNP</i>  | 475.35 | -2.04 | 0.68 | -3.02 | 0.003 | 0.037 | CDS |

---
